# Supplementary material for: The correlation among occupational stress, coping style and depressive symptoms in 2,083 Chinese manufacturing workers
Source: Research Square preprint supplement (doi:10.21203/rs.3.rs-4341843/v1), 2024-05-14
Supplement: Supplementary file 1 [file ffb93bf2ce079e069ad73fc0.xlsx]

## Sheet: Sheet1
Number	Age	Gender	Highest education	Marital status	Personal monthly income	Job position	On duty seniority	Average weekly working hours	Shift work	B1	B2	B3	B4	B5	B6	B7	B8	B9	B10	B11	B12	B13	B14	B15	B16	B17	C1	C2	C3	C4	C5	C6	C7	C8	C9	C10	C11	C12	C13	C14	C15	C16	C17	C18	C19	C20	D1	D2	D3
1	34	1	3	1	4	2	2	1	1	5	5	5	5	5	2	2	1	3	1	5	1	1	3	1	3	3	3	2	3	2	3	3	3	3	3	3	3	2	1	4	3	2	1	3	1	3	1	1	1
2	36	2	1	2	2	1	4	4	1	3	3	3	3	4	3	4	3	4	3	3	2	3	2	3	2	2	4	4	2	4	4	5	4	4	4	4	4	4	4	4	4	5	4	5	5	4	2	2	1
3	47	2	1	3	1	1	4	3	1	5	5	5	5	5	2	2	2	5	1	2	5	2	5	2	1	1	5	1	5	1	5	5	5	5	5	1	4	5	2	4	5	4	2	4	5	4	0	0	0
4	45	2	1	3	2	1	3	3	1	2	4	3	5	5	4	2	2	1	1	1	1	1	1	2	2	2	3	2	3	1	1	1	3	3	2	4	4	2	2	3	3	1	1	4	2	2	0	0	0
5	51	1	3	2	4	2	4	2	1	1	1	3	3	1	3	2	3	3	1	3	3	3	3	2	3	3	3	3	2	3	3	3	3	3	2	5	3	3	2	3	3	3	3	3	3	3	1	1	1
6	25	2	1	1	2	2	2	4	1	2	3	4	3	3	3	4	4	4	3	4	4	4	3	4	4	4	2	2	2	2	2	2	2	2	2	2	2	2	2	2	2	2	2	2	2	2	2	2	2
7	41	2	1	2	2	1	1	1	1	4	3	4	4	3	4	4	4	3	4	3	4	4	3	4	4	3	4	2	3	2	5	4	2	3	4	2	4	2	2	4	3	2	2	2	3	2	2	1	2
8	30	2	3	1	3	2	2	1	1	3	3	2	3	3	3	3	3	2	1	2	3	3	3	3	3	3	3	2	2	2	3	2	2	2	3	2	2	3	3	2	3	2	3	3	2	3	1	1	1
9	40	2	1	2	2	2	4	4	1	4	5	4	4	3	3	3	3	4	1	4	4	4	4	5	3	3	4	1	1	1	4	1	1	1	1	1	4	1	1	4	3	1	1	3	1	1	1	1	1
10	22	2	3	1	2	2	1	2	1	4	4	4	4	4	2	4	2	2	2	3	3	2	3	2	3	3	4	2	2	2	4	3	3	3	4	2	4	2	2	3	3	2	2	3	2	3	1	1	1
11	39	2	3	2	2	2	3	4	1	4	4	4	4	4	4	4	4	3	1	3	3	2	2	3	2	2	3	2	3	2	3	2	2	2	4	3	3	2	2	3	3	2	2	3	3	3	0	1	1
12	28	2	1	2	1	1	2	4	2	4	4	4	4	4	4	4	4	4	4	4	4	4	4	4	4	4	5	5	1	1	5	1	3	2	4	2	4	5	5	4	4	1	5	4	5	2	2	2	2
13	39	2	1	3	2	2	3	1	1	4	4	4	4	4	2	2	2	2	2	2	2	2	2	2	4	4	4	2	4	2	4	4	4	4	4	2	2	4	2	4	4	4	4	4	4	4	1	2	2
14	40	2	1	2	1	2	3	1	1	4	4	4	4	4	2	4	4	2	1	2	2	2	2	2	2	2	2	2	2	2	2	2	2	2	2	2	2	2	2	2	2	2	2	2	2	2	0	0	0
15	49	2	1	2	1	2	2	4	1	3	4	2	4	4	2	2	4	4	1	3	2	2	3	3	3	3	4	3	3	1	3	3	3	3	4	3	3	3	3	4	3	4	3	3	3	3	0	0	0
16	45	2	2	2	2	2	4	4	1	4	5	5	4	5	2	2	2	2	1	3	3	2	3	3	3	3	4	2	5	2	5	2	1	4	5	1	4	1	2	4	5	1	2	4	4	4	1	1	0
17	42	2	2	2	1	2	4	3	1	3	3	3	3	3	3	2	2	2	1	2	2	2	2	2	3	3	3	3	3	2	3	2	2	2	3	2	3	2	2	3	3	2	2	3	3	3	1	1	1
18	46	2	1	2	1	2	4	4	1	3	3	3	3	5	2	2	2	1	1	3	2	2	2	3	2	2	5	2	4	2	5	2	2	4	5	2	5	2	2	4	4	2	2	4	2	5	0	0	0
19	27	2	1	1	2	2	3	4	1	4	4	4	4	2	2	2	2	2	2	2	2	2	2	3	2	2	4	2	3	1	1	2	1	4	4	1	4	3	2	3	4	2	3	2	3	3	1	1	1
20	32	2	1	2	2	2	2	4	1	4	4	4	4	4	3	2	2	2	2	2	3	2	3	4	2	2	4	2	4	2	4	2	2	2	3	2	2	3	3	3	3	3	3	3	3	3	1	1	1
21	45	2	1	2	2	2	2	4	1	4	4	4	4	4	2	2	3	3	1	2	2	2	3	4	2	2	5	2	1	2	4	4	1	4	4	2	4	2	1	4	4	2	2	4	2	2	0	0	1
22	39	1	3	2	4	2	3	2	1	4	5	4	4	5	2	2	2	2	1	2	2	2	2	2	2	2	3	2	3	2	3	2	2	2	4	2	3	2	2	4	4	2	2	3	3	3	1	1	0
23	35	2	2	2	2	2	4	2	1	4	4	4	4	4	4	4	4	2	1	2	2	2	2	2	2	2	4	1	4	1	4	1	4	4	4	1	4	1	4	4	4	1	2	4	4	2	0	0	0
24	34	2	1	2	1	2	4	4	1	3	3	3	3	4	2	2	2	4	2	4	2	2	2	4	2	2	4	4	4	1	4	4	2	2	3	4	4	1	3	4	4	4	1	2	1	4	0	0	0
25	48	1	3	2	3	2	4	2	1	5	5	4	4	4	3	2	2	2	1	2	3	2	2	1	2	2	4	2	4	4	4	2	2	4	4	4	4	4	2	2	2	2	2	2	2	2	1	1	1
26	38	1	3	2	3	2	3	2	1	4	4	4	4	4	3	3	3	2	2	2	3	2	3	2	2	2	3	3	3	3	3	3	3	2	3	3	3	3	3	3	3	2	3	3	3	3	1	1	1
27	25	2	1	2	1	2	1	4	1	5	5	5	4	5	2	2	2	2	1	4	2	1	2	4	1	1	5	2	4	1	5	1	1	5	5	1	4	1	1	5	5	1	1	5	1	5	0	1	0
28	28	2	3	2	1	2	1	2	1	3	3	3	3	3	3	3	3	3	3	3	2	2	2	2	3	3	3	3	3	3	3	3	3	3	3	3	3	3	3	3	3	3	3	3	3	3	1	1	1
29	25	2	1	2	2	2	1	4	1	3	3	3	3	3	3	3	3	3	1	3	3	2	5	3	2	2	3	3	3	3	3	3	3	3	3	4	4	2	3	3	3	3	3	3	4	4	2	1	1
30	48	1	1	1	1	2	4	4	1	5	4	4	5	5	5	4	4	4	1	4	5	4	4	4	3	3	4	1	4	1	4	1	1	4	4	2	4	1	1	3	3	1	1	3	1	4	0	0	0
31	31	1	1	2	1	2	4	5	1	3	4	1	4	3	4	4	5	4	5	5	5	4	4	5	1	2	4	4	4	4	5	4	4	4	4	4	4	3	4	3	4	4	5	4	4	4	3	2	3
32	42	2	2	2	2	2	4	1	1	4	4	4	4	4	2	3	3	3	1	2	3	2	3	2	3	3	4	2	4	2	4	3	2	3	4	2	4	2	2	4	4	2	2	3	2	3	1	0	1
33	45	2	2	2	2	2	4	2	1	4	5	5	4	5	1	2	3	2	1	3	2	3	3	1	2	2	3	2	4	2	4	2	4	4	4	2	4	2	2	3	4	3	2	4	2	4	0	1	1
34	45	2	1	1	1	2	4	4	1	3	3	3	3	4	2	2	2	2	1	2	2	2	4	4	2	2	3	2	2	1	3	2	2	2	1	1	1	1	1	1	1	1	1	1	1	1	0	0	0
35	47	2	2	2	1	2	3	4	1	4	4	4	4	4	2	2	2	2	1	2	2	2	4	4	2	2	4	1	4	1	4	1	1	1	4	2	2	1	1	4	4	1	1	4	1	4	0	0	0
36	29	2	1	3	2	1	2	4	1	2	4	3	4	4	2	2	2	3	2	2	2	2	2	2	2	2	4	2	2	2	5	2	2	2	2	2	4	2	1	5	5	5	1	5	5	5	1	1	1
37	34	2	1	2	1	2	4	4	1	4	5	4	4	5	2	2	2	3	1	3	3	3	3	3	3	3	4	4	4	4	4	4	4	4	4	4	4	4	4	4	4	4	4	4	4	4	1	1	1
38	34	2	3	2	2	2	4	2	1	4	4	4	4	4	1	3	2	2	1	3	3	2	2	2	5	3	4	1	3	2	4	2	2	4	4	2	4	2	2	2	4	2	2	3	2	4	0	0	0
39	43	1	1	2	1	2	2	4	1	5	5	5	5	5	5	4	4	4	1	4	4	2	4	5	3	3	4	1	4	1	4	3	1	2	4	1	4	1	1	3	4	1	1	3	1	4	0	0	0
40	35	2	3	2	2	2	3	2	1	4	4	4	4	4	2	4	4	2	4	2	2	2	2	2	2	2	2	2	2	2	4	4	2	2	2	4	4	2	4	2	4	2	2	2	2	2	1	1	1
41	37	2	1	2	1	2	4	4	1	4	4	4	4	4	2	2	2	2	2	2	2	2	4	4	2	2	4	2	2	2	3	4	2	2	4	2	2	2	2	2	2	2	2	2	2	2	0	0	0
42	47	2	2	2	1	2	4	2	1	4	4	4	4	4	3	3	3	3	1	3	4	2	2	1	3	3	4	2	4	2	4	2	2	4	4	4	4	2	2	4	4	3	2	4	2	4	1	1	0
43	47	1	2	1	2	2	4	4	1	4	5	4	4	4	2	2	2	2	1	3	3	2	3	3	2	3	3	2	3	2	3	3	2	4	3	2	2	2	2	3	4	2	2	4	4	3	1	0	2
44	49	2	2	2	1	2	4	1	1	4	4	4	4	4	4	4	4	4	4	4	4	2	4	4	2	2	4	4	4	4	4	4	4	4	4	4	4	4	4	4	4	4	4	4	4	4	0	0	0
45	41	2	2	2	2	2	4	2	1	5	4	4	4	5	2	2	2	2	2	2	2	2	3	2	3	3	4	2	2	1	4	1	1	1	1	1	1	1	1	3	3	1	1	1	1	1	0	0	0
46	46	2	1	2	1	2	2	1	1	4	4	2	4	5	1	1	1	1	1	1	3	1	3	3	1	1	3	2	4	1	4	4	3	3	3	3	4	2	3	3	3	3	3	3	3	3	1	1	1
47	45	2	1	2	1	2	2	4	1	4	4	5	4	5	5	2	1	5	1	3	4	3	3	4	2	2	4	1	4	1	4	1	1	1	5	2	4	2	1	4	4	1	1	4	1	4	0	1	1
48	41	2	1	2	1	2	4	4	1	4	4	4	4	4	2	2	2	2	1	2	2	2	4	4	2	4	5	1	5	2	5	4	1	4	4	4	4	4	1	4	4	2	2	4	1	4	0	0	0
49	37	2	1	2	2	1	3	4	1	4	4	4	4	4	2	2	2	2	1	2	2	2	3	4	2	2	4	2	4	2	4	2	2	2	4	2	4	2	2	2	4	2	2	4	2	4	1	0	1
50	37	2	3	2	2	2	3	1	1	4	4	4	4	4	2	2	3	2	1	1	1	1	2	1	4	4	4	3	3	2	2	3	3	3	3	3	3	3	3	3	3	3	3	3	3	3	0	0	0
51	42	2	1	2	1	1	2	5	1	4	4	4	4	4	2	2	2	2	1	2	5	1	4	4	2	2	2	2	2	1	4	1	2	3	2	1	4	2	1	2	2	2	2	2	2	2	1	1	1
52	29	2	1	1	2	1	1	4	1	4	4	4	4	4	2	2	2	2	2	2	2	2	2	2	2	2	2	2	4	2	4	2	4	2	4	4	4	2	4	4	4	4	2	2	4	4	1	1	1
53	31	2	1	3	2	2	2	5	1	4	4	4	4	4	5	5	3	4	3	4	4	3	3	3	5	5	3	2	2	2	3	3	2	2	2	2	2	2	2	2	2	2	2	3	3	3	1	1	1
54	43	2	1	2	1	2	4	5	1	4	4	4	4	4	2	2	2	3	1	2	2	2	3	3	2	2	4	2	2	2	4	4	2	4	4	2	4	2	4	2	4	4	2	2	2	4	1	1	1
55	45	2	1	2	2	1	2	4	1	3	4	3	3	3	3	3	3	3	1	3	2	1	3	3	2	2	5	1	5	1	5	1	1	5	5	1	5	1	1	5	5	5	5	5	5	5	1	1	0
56	33	2	1	2	1	1	3	5	1	4	4	4	4	4	2	2	2	2	1	2	5	1	4	4	2	2	5	1	1	1	5	2	2	2	4	2	4	2	2	2	4	4	2	2	2	2	1	1	1
57	43	2	1	2	2	1	3	4	2	4	4	4	4	4	4	2	4	2	2	2	4	4	3	4	2	2	4	2	4	2	4	3	2	4	4	2	4	2	2	4	4	2	2	4	1	4	1	1	1
58	36	1	2	1	2	2	1	5	2	5	5	4	4	4	2	2	1	2	1	2	2	2	2	3	3	3	4	2	2	2	3	2	2	2	3	2	3	2	2	2	3	2	2	2	2	3	0	0	0
59	30	2	1	2	2	1	3	4	1	3	4	3	3	4	3	4	4	4	4	4	4	4	4	4	4	4	2	2	2	2	2	2	2	2	2	2	2	2	2	2	2	2	2	2	2	2	1	1	0
60	48	2	1	2	1	2	4	4	1	5	5	5	5	5	2	2	2	2	1	2	4	3	2	4	4	3	3	2	3	2	4	2	3	2	3	3	3	2	2	2	3	4	2	4	3	3	0	1	1
61	46	2	3	2	2	2	3	2	1	4	4	4	4	4	3	4	4	2	1	2	1	1	1	1	3	3	3	1	2	1	5	3	1	5	5	2	3	2	1	3	5	2	1	5	1	5	0	1	1
62	48	2	1	2	1	1	3	5	1	4	4	4	4	4	2	2	2	2	2	2	4	2	2	4	2	2	3	3	3	2	4	2	2	2	4	2	2	2	2	4	4	2	2	4	2	4	0	0	0
63	49	2	1	2	2	1	4	4	1	3	3	3	3	4	2	1	2	2	1	2	2	4	4	4	1	1	5	3	3	3	3	3	3	3	3	3	3	3	3	3	3	3	3	3	3	3	1	1	1
64	41	2	1	2	2	1	2	4	1	4	4	4	4	4	2	2	2	2	2	2	1	2	2	2	2	2	4	2	4	2	4	2	2	4	4	2	4	2	2	4	4	2	2	4	2	4	1	1	1
65	40	2	1	2	1	1	3	2	1	3	4	3	3	3	3	2	3	2	1	2	3	3	3	3	2	2	4	2	4	2	4	4	4	2	2	2	4	2	4	4	4	2	2	4	4	4	1	1	1
66	45	2	1	2	1	1	4	4	1	3	4	2	4	3	4	4	3	3	2	4	2	2	2	4	5	2	1	1	1	1	1	1	1	1	1	1	5	1	1	5	5	5	5	5	5	5	0	1	2
67	33	1	1	1	1	1	1	4	2	4	5	4	5	5	4	2	4	2	3	2	4	4	3	4	4	4	1	2	2	3	2	2	3	3	3	2	3	2	3	3	2	3	3	3	3	2	1	2	1
68	36	2	1	2	1	1	2	5	1	4	4	4	4	4	2	2	2	2	1	2	5	5	4	4	2	2	5	1	1	1	5	1	2	2	4	2	4	2	2	2	4	2	2	2	2	2	1	1	1
69	35	2	1	2	1	1	3	4	2	3	4	3	3	4	3	3	3	3	1	3	3	2	3	3	2	2	4	2	3	2	4	2	2	4	4	2	4	2	2	4	4	2	2	4	2	3	0	0	1
70	45	2	1	2	2	1	4	1	1	4	4	4	4	4	4	2	2	2	1	2	2	2	2	3	3	3	4	2	4	2	4	2	2	4	3	4	4	3	4	4	3	4	1	1	1	1	1	0	0
71	40	2	2	2	2	2	2	5	1	4	4	4	4	4	2	4	2	2	1	2	2	2	2	4	2	4	4	2	3	2	4	1	1	1	4	1	4	1	1	4	4	1	1	4	1	3	0	1	0
72	36	1	3	2	3	2	2	1	1	5	5	5	5	5	5	1	1	1	1	1	1	1	1	1	1	1	5	1	1	1	5	1	1	3	5	1	5	5	1	5	5	1	1	3	1	1	0	0	0
73	32	2	1	3	1	2	4	4	1	4	4	4	4	3	2	2	2	3	1	2	2	2	3	3	2	3	4	3	4	2	4	4	3	4	4	2	3	3	2	3	3	2	2	4	4	4	0	0	0
74	45	2	1	2	1	1	1	4	1	3	4	3	4	4	2	3	3	3	1	3	3	3	3	4	2	2	3	1	2	2	5	3	3	3	4	3	3	2	2	4	4	2	2	4	3	3	1	1	1
75	25	2	1	1	1	2	2	4	1	4	4	4	4	3	2	2	2	2	2	3	2	2	2	4	2	4	5	2	1	1	3	1	1	1	3	1	3	1	1	3	3	1	1	1	1	1	0	0	1
76	45	2	1	2	2	2	4	4	1	4	4	1	4	4	3	2	2	2	1	2	2	3	3	3	2	2	4	2	4	2	4	2	2	2	4	2	4	2	2	4	4	1	2	4	1	3	1	1	0
77	35	2	1	2	1	1	3	3	1	3	3	5	3	5	3	5	4	3	5	3	3	5	4	5	4	4	3	4	3	4	3	3	4	3	5	4	4	4	3	4	4	4	5	4	4	4	2	3	2
78	45	2	1	2	2	1	4	4	2	3	1	3	4	4	2	4	3	4	4	3	3	3	2	3	3	4	2	2	3	2	2	4	2	3	3	2	3	3	2	2	3	2	2	2	3	3	1	1	2
79	43	2	1	3	2	2	3	4	1	4	5	4	4	4	1	2	2	4	1	2	2	2	2	2	2	2	5	1	5	1	5	1	1	5	5	1	5	1	1	5	5	5	1	5	5	5	0	0	0
80	40	2	1	2	1	1	3	4	1	3	3	3	3	3	2	2	3	2	1	2	2	2	2	2	1	1	5	1	5	1	5	2	1	5	5	1	3	2	4	4	4	2	4	4	4	4	1	1	1
81	42	2	1	2	1	1	3	4	1	4	4	4	4	4	1	1	1	1	1	4	1	1	3	3	1	1	4	1	4	1	5	1	1	2	5	2	5	5	1	5	5	1	1	1	1	1	0	0	1
82	43	2	1	2	1	1	3	4	2	2	1	2	3	2	2	1	3	3	2	3	1	3	3	3	3	3	1	2	2	2	2	2	2	2	2	1	1	1	2	1	1	1	1	1	1	1	0	0	0
83	36	2	1	2	2	2	3	4	1	4	4	4	4	4	2	2	2	2	1	2	2	2	2	4	4	4	4	2	2	2	4	4	4	4	4	4	4	2	2	4	4	4	2	4	2	4	0	0	0
84	45	2	1	2	2	1	4	4	1	2	3	3	2	3	3	3	3	3	1	3	3	3	3	3	2	1	4	4	1	1	4	4	4	4	4	4	4	1	2	3	3	4	4	4	4	4	1	1	1
85	34	2	3	1	2	2	4	2	1	3	3	2	3	3	3	2	3	2	1	3	3	2	3	2	2	3	3	3	3	3	3	3	2	2	2	2	2	3	3	3	2	2	2	2	2	3	2	2	1
86	35	2	1	2	1	1	4	4	1	4	4	1	4	4	2	2	2	4	2	2	2	2	3	3	2	2	3	2	2	2	3	3	2	2	3	2	3	2	3	3	3	2	2	2	2	2	1	1	1
87	48	1	3	2	2	2	4	4	2	1	3	1	1	3	4	3	4	3	1	3	2	2	3	3	2	2	2	3	3	3	2	3	3	2	2	2	2	3	3	2	2	3	3	3	3	3	2	1	1
88	43	2	1	2	2	1	3	4	1	2	3	3	2	3	3	2	4	2	2	2	2	2	2	4	2	2	4	1	4	2	4	2	2	2	4	2	2	2	2	3	3	2	2	3	2	2	1	1	1
89	31	2	2	2	1	2	3	3	1	5	5	4	4	4	3	3	3	2	1	3	1	1	1	1	3	3	4	2	2	2	3	2	2	3	3	2	2	2	2	3	3	2	2	2	2	2	1	1	1
90	34	2	1	2	1	1	1	4	1	4	4	4	4	4	1	1	1	3	1	1	4	1	1	3	3	1	2	2	2	2	5	2	2	2	4	2	1	2	2	4	1	1	1	2	1	1	1	1	0
91	42	2	1	2	1	1	4	4	1	4	4	1	4	4	1	1	1	1	1	1	1	1	2	2	1	1	5	5	5	1	5	1	1	1	5	1	5	1	1	5	5	1	1	3	1	3	0	0	0
92	39	1	2	2	2	2	4	3	1	4	4	4	4	4	2	4	3	2	2	2	2	3	3	3	3	3	4	1	3	2	4	2	1	3	4	1	4	1	3	4	4	1	2	3	1	4	1	1	0
93	25	2	3	1	2	2	1	1	1	2	3	4	3	5	3	3	3	1	1	1	3	1	3	3	2	3	3	2	4	2	4	3	2	4	4	2	4	2	1	4	4	4	4	4	4	4	1	1	0
94	41	2	1	2	2	1	2	4	1	3	3	3	3	4	2	2	2	2	1	2	2	2	2	2	2	2	4	3	2	4	3	3	4	3	3	4	3	4	4	3	3	4	3	4	2	3	2	3	1
95	39	2	1	2	1	1	3	5	1	4	4	4	4	4	2	2	2	2	2	2	2	2	2	3	2	2	3	1	4	1	4	2	1	2	4	3	4	1	2	2	4	2	4	2	2	4	1	0	0
96	51	2	1	2	2	2	1	4	1	5	5	5	5	5	1	2	2	2	2	3	3	2	3	3	2	2	3	1	3	1	5	5	5	5	3	5	2	2	2	3	3	3	3	3	2	3	1	1	1
97	32	2	3	2	1	2	3	1	1	4	4	4	4	4	2	2	2	2	1	2	2	2	2	2	4	4	3	2	3	2	3	3	3	3	3	3	3	2	2	3	3	3	2	3	2	3	1	1	1
98	32	2	2	2	2	2	3	1	1	4	4	4	4	4	4	4	4	3	4	4	4	4	4	4	4	4	4	4	4	4	4	4	4	4	4	4	4	4	4	4	4	4	4	4	4	4	0	0	0
99	34	2	1	2	1	1	4	5	1	4	4	4	4	4	2	3	3	4	1	5	4	3	3	3	2	2	3	2	2	2	4	2	2	2	3	3	3	2	3	3	3	3	3	3	3	3	1	1	1
100	40	2	1	2	1	2	1	2	1	3	2	3	3	4	2	2	1	1	2	2	4	3	2	1	2	3	3	1	4	2	4	4	1	4	1	1	1	1	1	1	1	1	1	1	1	1	1	1	1
101	29	2	2	2	2	1	3	4	1	3	3	4	3	3	3	5	5	3	5	3	5	5	5	5	1	1	3	3	3	3	3	3	3	3	3	3	3	3	3	3	3	3	3	3	3	3	1	1	1
102	47	2	1	2	1	1	4	2	1	4	4	2	2	4	5	5	2	2	1	4	1	1	1	4	5	3	4	2	4	2	4	2	1	5	5	1	5	5	2	4	5	5	2	4	2	5	3	1	1
103	38	2	2	3	1	2	3	2	1	5	5	4	4	4	2	2	2	4	1	4	2	2	2	2	4	4	5	1	4	1	4	2	2	4	4	2	4	2	2	4	4	2	2	4	2	4	1	1	1
104	37	2	2	2	2	2	3	4	1	4	5	4	4	4	2	2	2	2	1	4	2	2	4	4	2	2	4	2	4	2	4	3	2	4	4	2	3	2	4	3	4	2	4	4	4	3	1	1	1
105	32	2	2	1	2	1	2	4	1	2	3	1	1	4	4	4	4	4	1	4	4	5	5	4	1	1	2	4	2	4	4	4	4	4	4	4	2	4	4	4	4	4	4	4	4	4	1	2	2
106	33	2	1	2	2	2	2	4	2	4	5	4	4	4	2	1	1	1	1	1	1	2	2	1	1	4	1	2	1	1	4	2	2	2	2	2	4	2	1	2	3	2	2	2	2	2	1	1	1
107	41	2	1	2	2	2	4	2	1	5	5	5	5	5	1	2	3	3	1	5	2	2	3	2	2	2	3	2	2	3	2	3	3	3	3	3	3	2	3	2	3	2	2	3	2	2	1	2	1
108	37	2	1	2	1	1	3	5	1	3	4	3	3	3	3	3	3	3	1	3	3	2	3	3	3	3	3	3	2	3	4	2	3	2	2	2	2	2	2	2	2	2	3	3	3	3	1	1	1
109	41	1	2	1	2	1	4	5	1	4	3	3	4	3	3	3	3	2	1	3	4	4	4	4	2	2	3	3	2	3	3	3	2	2	2	4	2	4	2	3	2	3	2	2	2	2	2	2	2
110	44	2	1	2	2	1	4	4	1	4	4	4	4	4	4	4	4	3	3	3	3	3	3	4	4	4	1	1	1	1	1	1	1	1	1	1	1	1	5	1	1	1	1	1	1	1	1	0	0
111	36	2	1	2	1	1	2	4	1	4	4	4	4	4	2	2	2	2	1	2	2	2	2	4	2	2	4	2	3	2	4	4	4	4	4	4	4	2	4	4	4	2	2	4	2	4	1	1	1
112	41	2	1	2	2	1	3	1	1	4	4	4	4	4	5	4	4	4	5	4	4	4	4	3	2	2	1	1	2	1	1	1	1	2	2	1	4	1	1	1	1	1	1	1	1	1	1	1	1
113	30	2	1	2	1	1	2	4	1	3	4	4	4	4	2	2	2	2	1	2	2	1	2	4	2	2	4	2	3	1	5	2	2	2	3	2	4	2	2	3	4	2	2	2	2	4	1	1	1
114	40	2	1	2	1	1	3	5	1	3	3	4	3	3	2	2	2	2	1	2	2	2	2	3	2	2	4	2	3	2	4	2	2	2	3	2	3	2	3	3	3	2	2	2	2	4	1	1	1
115	40	2	1	2	1	1	2	5	1	3	4	3	3	3	2	2	2	2	1	2	2	2	2	3	2	2	4	2	3	1	5	2	2	2	3	2	4	2	2	3	3	2	2	2	2	4	1	1	1
116	26	2	1	2	1	1	2	5	1	3	4	3	3	3	2	2	2	2	1	2	2	2	2	3	2	2	4	2	3	1	5	2	2	2	3	2	3	2	2	3	3	2	2	2	2	3	1	1	1
117	25	2	2	1	1	1	3	5	1	4	4	4	3	4	2	2	2	2	1	4	2	3	3	2	2	2	3	2	2	1	5	2	2	2	3	3	5	2	3	3	5	2	2	3	3	3	1	1	0
118	39	2	1	2	2	2	3	4	1	3	3	3	3	2	2	2	2	2	2	2	2	2	4	4	2	2	5	1	3	1	5	1	1	2	4	2	2	2	2	3	4	2	2	4	2	4	0	1	0
119	38	2	3	2	2	2	4	2	1	1	1	1	1	3	5	4	5	3	1	5	5	5	5	5	2	2	1	5	1	5	1	5	5	5	1	5	3	5	5	1	3	5	5	1	5	1	2	3	3
120	30	2	1	2	2	1	3	4	1	4	4	4	4	4	4	2	4	4	2	4	4	4	4	4	2	2	3	3	1	1	4	4	3	3	3	2	3	3	3	3	3	3	3	3	3	3	1	1	1
121	36	2	1	3	2	1	2	2	1	4	4	4	4	4	2	2	2	4	2	4	3	4	3	4	3	2	3	2	2	1	5	5	3	5	4	5	5	3	3	3	3	5	2	5	5	3	1	1	1
122	40	1	2	2	2	2	4	1	1	4	4	4	3	3	3	3	3	3	1	3	3	3	4	4	3	3	4	2	4	2	4	2	2	1	4	2	3	2	2	3	4	2	2	2	2	3	1	0	1
123	39	2	1	2	1	2	4	3	1	4	4	4	3	4	5	4	3	4	1	3	5	2	3	5	1	1	3	2	1	1	3	1	1	1	3	1	3	1	1	1	1	1	1	1	1	1	1	1	0
124	24	2	1	1	2	1	1	3	1	4	4	5	3	4	3	4	3	1	1	1	2	1	4	4	1	1	1	1	2	1	2	2	2	4	2	1	1	1	1	1	1	1	1	2	2	2	1	1	0
125	19	2	1	1	2	2	1	4	2	4	5	4	4	4	2	4	1	4	1	1	1	4	4	4	1	1	4	3	2	2	3	4	4	4	4	4	4	3	3	3	4	3	4	1	4	3	1	1	3
126	32	2	1	3	1	2	4	5	2	4	4	4	4	4	4	2	2	2	2	3	2	2	3	3	2	2	4	2	3	2	3	2	3	3	3	3	3	2	3	3	3	2	3	3	4	4	1	1	1
127	40	2	2	2	2	1	1	1	1	4	4	3	3	4	3	2	4	3	1	3	4	5	5	5	2	2	3	2	3	2	4	2	2	2	3	2	3	2	2	3	3	3	3	3	3	3	1	1	0
128	46	2	1	2	1	1	4	2	1	3	4	3	3	4	2	3	3	4	1	3	3	4	2	4	3	4	3	2	4	3	4	3	3	3	3	4	3	3	3	3	3	4	4	3	3	3	1	2	2
129	46	2	1	1	2	1	3	4	1	4	4	4	4	4	2	1	1	1	1	1	1	3	2	4	1	1	4	1	4	1	4	1	1	1	4	1	4	1	1	4	4	1	1	4	4	4	0	0	0
130	38	2	2	2	2	2	3	1	1	5	5	5	5	5	1	1	1	1	1	1	1	1	1	1	3	3	3	2	4	2	3	2	2	3	3	2	3	2	2	3	3	2	2	3	2	3	0	0	0
131	48	2	1	2	1	2	4	4	1	4	4	4	4	4	1	1	1	1	1	2	1	1	1	4	3	3	4	1	4	2	4	4	2	4	4	2	3	2	3	4	3	3	1	1	1	1	0	0	0
132	53	2	1	2	1	2	4	5	1	4	4	4	4	4	4	3	3	4	2	4	5	5	3	4	4	4	4	2	2	2	4	3	3	3	4	2	4	2	3	4	3	3	2	4	2	3	1	1	1
133	47	2	1	1	1	1	4	1	2	4	4	4	4	5	4	4	4	4	4	4	2	2	4	4	2	2	5	1	5	1	5	1	1	5	5	1	5	1	1	5	5	1	1	5	5	5	0	0	0
134	34	2	1	2	1	1	1	1	1	4	4	4	4	4	4	4	4	4	1	3	4	2	2	3	3	3	3	3	3	3	3	3	3	3	3	3	3	3	3	3	3	3	3	3	3	3	1	1	1
135	28	2	2	2	2	1	1	1	1	3	3	3	3	3	3	3	3	3	4	3	3	4	4	4	4	4	3	4	5	1	4	1	1	5	5	2	4	1	4	4	4	2	4	4	3	2	2	2	1
136	40	2	1	2	1	1	4	4	1	3	3	3	3	3	3	2	2	3	1	3	2	1	2	3	1	1	3	2	3	3	4	3	3	3	3	3	3	3	3	3	4	2	2	4	4	2	1	2	1
137	36	2	1	2	1	2	3	4	1	4	4	4	4	5	2	2	2	3	2	4	4	3	3	3	2	2	4	4	4	2	3	2	3	2	2	2	3	2	3	2	4	4	4	4	2	4	1	1	1
138	33	2	1	3	1	1	3	4	1	4	4	4	4	4	2	4	2	4	4	4	4	4	3	4	4	4	4	4	4	2	3	2	3	3	2	2	3	2	3	2	4	4	4	4	2	4	1	1	0
139	47	2	1	2	2	1	3	4	1	5	5	5	5	5	4	4	3	2	1	4	2	2	2	4	3	3	5	5	5	1	5	1	3	4	4	1	5	5	3	2	4	2	4	3	2	4	1	0	0
140	44	2	2	2	2	1	2	3	1	3	4	3	4	5	2	2	2	3	1	2	2	3	3	4	2	2	4	2	3	1	4	3	2	4	4	2	4	2	2	3	4	2	2	4	1	4	1	1	1
141	37	2	1	2	1	1	1	4	1	5	5	4	4	5	2	2	2	2	1	4	2	2	3	3	1	1	4	1	1	1	4	2	1	4	4	2	2	2	2	3	4	2	2	3	2	3	0	0	1
142	48	2	1	2	1	1	4	4	1	2	3	2	4	4	2	2	2	3	2	2	2	2	3	2	2	2	4	1	2	2	2	2	2	2	2	2	3	2	2	2	2	2	2	2	2	5	1	1	1
143	32	2	1	2	1	1	3	4	1	4	3	4	3	4	2	4	4	4	5	3	4	2	3	4	4	4	1	1	2	1	3	1	4	3	4	4	1	1	1	1	1	1	1	1	1	1	0	0	0
144	43	2	2	3	2	2	2	1	1	5	5	5	5	5	2	2	2	3	3	3	3	3	3	3	3	3	1	1	1	1	1	1	1	1	1	1	1	1	1	1	1	1	1	1	1	1	0	0	0
145	45	2	2	3	1	2	4	5	1	4	4	4	4	4	2	4	1	4	2	2	3	2	4	4	1	1	4	2	3	2	4	2	2	2	3	3	3	2	3	4	4	3	2	2	4	4	0	0	1
146	21	2	1	1	2	1	1	4	1	4	3	3	3	3	2	2	3	3	1	4	4	4	4	4	2	2	2	2	1	2	4	4	4	4	4	4	4	2	4	3	3	3	3	3	4	4	1	1	2
147	57	2	2	2	2	2	4	1	1	5	4	4	4	4	4	4	3	2	1	1	2	1	3	1	2	3	4	1	3	2	4	2	2	4	4	2	4	1	2	4	4	2	2	3	2	4	0	1	1
148	35	2	2	1	2	1	1	3	1	4	4	4	4	4	4	4	4	1	1	1	1	1	1	3	1	3	3	3	3	3	3	3	3	3	3	3	3	3	3	3	3	3	3	3	3	3	1	1	1
149	46	2	1	3	1	1	2	4	1	4	3	3	4	4	2	2	2	2	1	3	4	2	2	3	2	2	4	2	4	1	5	1	2	3	4	2	4	2	2	4	4	2	2	4	2	4	0	0	0
150	29	2	1	1	2	1	1	4	2	3	3	3	3	4	3	3	3	3	3	3	3	3	3	3	2	2	1	4	2	2	4	4	4	2	2	4	4	2	4	4	4	4	4	4	4	4	0	1	1
151	26	2	1	2	1	2	3	5	1	4	4	4	4	4	3	2	2	2	1	4	4	3	3	4	2	2	2	3	2	2	2	4	4	2	2	3	3	4	3	2	3	2	4	2	4	2	2	1	1
152	34	2	1	2	1	1	4	4	1	3	3	3	4	3	3	3	3	3	3	3	3	3	3	3	3	3	1	2	1	1	1	1	1	1	1	1	1	2	1	3	3	3	3	3	3	3	1	1	1
153	31	2	1	2	1	1	2	1	1	4	4	4	4	4	2	2	2	4	1	3	3	3	3	3	2	1	3	2	1	2	3	1	1	3	4	2	2	2	2	4	4	2	2	4	2	4	1	1	1
154	20	2	2	1	2	1	1	4	1	3	3	3	3	2	2	3	3	3	1	3	3	3	3	3	2	2	3	2	2	2	3	2	2	2	2	2	3	2	2	3	3	3	2	3	2	3	1	1	1
155	24	1	2	1	2	2	2	4	1	3	3	3	3	3	2	2	2	2	2	2	2	2	2	3	2	2	3	1	3	1	2	2	3	2	2	2	2	2	2	3	2	2	2	2	2	2	1	1	1
156	36	2	3	2	2	2	3	1	1	4	4	4	4	4	4	2	4	4	1	1	2	3	4	2	4	4	3	1	3	2	4	2	2	4	4	2	4	2	2	4	4	2	2	4	2	3	1	1	1
157	42	2	1	2	1	1	3	4	1	3	2	3	4	4	3	3	4	3	2	3	2	2	3	3	3	4	2	2	1	1	1	2	2	2	1	2	1	2	1	1	2	2	2	2	2	2	1	0	0
158	47	2	1	2	2	1	2	4	1	4	4	3	4	3	3	4	4	3	4	4	4	2	2	4	3	3	4	3	4	4	3	4	4	3	4	3	3	4	4	4	3	3	4	4	4	4	2	2	1
159	21	2	1	3	1	1	1	1	1	4	4	4	4	4	4	4	4	4	4	4	3	3	3	3	2	1	4	2	3	5	3	3	2	3	3	2	3	3	3	3	3	3	3	2	2	2	1	1	1
160	38	2	2	2	1	2	3	5	1	4	4	4	4	4	2	2	2	3	1	2	2	2	3	3	2	2	3	2	3	1	3	2	2	3	4	2	3	2	2	3	3	2	2	3	2	3	1	1	1
161	43	2	1	2	1	1	3	4	2	4	4	4	4	4	4	3	2	3	3	3	4	3	3	4	2	2	4	3	2	2	4	3	2	4	4	4	4	2	1	2	4	2	2	4	2	4	1	1	1
162	34	2	1	2	2	1	3	1	2	5	3	4	4	4	4	4	4	2	3	2	3	4	2	4	3	5	1	1	3	3	2	3	3	3	3	3	2	2	2	3	3	2	3	3	4	2	1	2	2
163	45	2	1	2	1	1	3	4	1	4	4	4	3	4	2	2	2	3	1	2	2	2	3	3	2	2	3	5	3	1	3	3	3	3	3	3	3	1	3	3	3	3	3	3	3	4	1	1	1
164	34	2	1	2	1	1	3	4	1	4	4	2	4	4	2	3	4	2	1	3	3	3	3	3	1	1	3	2	3	2	3	2	2	3	3	2	3	2	2	3	3	3	3	3	2	3	2	1	1
165	41	2	2	2	2	2	4	5	1	4	4	4	4	4	2	2	2	2	1	2	2	2	4	3	3	3	3	2	3	2	4	4	4	4	4	2	4	2	2	4	4	2	2	4	2	4	0	1	0
166	23	1	2	1	1	1	2	4	1	3	4	3	3	4	2	3	3	3	2	3	3	3	4	3	3	3	2	2	2	2	2	3	3	2	3	3	3	2	3	3	3	2	3	3	3	2	1	1	1
167	30	1	1	1	2	2	1	4	1	4	4	4	4	4	2	2	3	2	1	2	2	2	3	4	2	2	3	2	3	1	4	2	2	4	4	2	3	4	3	4	4	2	2	4	3	4	1	1	0
168	41	2	3	2	3	2	4	2	1	3	3	3	3	3	3	3	3	3	3	3	3	3	3	3	3	3	3	3	3	3	3	3	3	3	3	3	3	3	3	3	3	3	3	3	3	3	2	2	2
169	30	2	1	2	2	2	4	4	1	3	4	4	3	4	1	2	2	2	1	3	2	2	3	4	2	1	3	1	2	1	5	2	3	3	4	1	3	2	2	4	4	2	2	4	2	4	0	1	1
170	36	2	3	2	1	1	1	4	1	3	4	3	3	3	3	3	2	3	2	3	3	2	3	2	2	2	3	2	3	2	4	2	3	3	3	2	3	2	2	4	4	2	2	4	3	4	2	1	0
171	35	2	2	2	2	1	1	4	1	5	5	5	5	5	1	2	2	2	1	1	1	1	2	3	2	2	4	1	4	1	4	2	2	1	4	2	4	2	2	4	4	2	2	4	2	4	0	0	1
172	35	2	1	3	1	1	1	4	1	4	4	4	4	4	4	4	4	4	4	4	4	4	3	3	2	2	4	2	4	4	4	2	2	2	2	2	3	3	2	2	2	2	2	2	3	3	1	1	1
173	29	1	2	2	2	2	4	5	1	4	4	4	4	4	2	2	2	2	1	3	3	2	3	5	3	2	3	3	2	2	3	2	2	3	3	2	3	2	2	2	3	3	3	3	3	3	1	1	0
174	45	2	1	3	1	2	4	4	2	3	4	4	4	4	4	1	1	4	4	1	1	1	4	4	4	4	4	4	4	4	4	4	4	4	4	4	4	4	4	4	4	4	4	4	4	4	0	0	1
175	32	2	1	3	2	2	2	4	1	3	3	2	3	3	2	3	3	2	1	4	3	4	3	4	1	1	2	3	2	2	2	3	4	4	3	2	3	2	2	2	3	2	4	4	4	4	1	1	2
176	36	2	3	2	2	2	3	1	1	4	4	4	4	4	2	2	4	3	1	2	2	2	3	2	4	4	2	2	3	2	4	3	2	2	4	4	4	2	2	4	4	2	2	4	3	4	1	1	1
177	46	1	2	2	2	2	4	4	1	4	4	4	4	4	4	2	2	2	1	2	2	2	2	2	4	4	4	2	2	2	4	4	4	2	4	4	4	2	2	4	4	2	2	2	2	4	0	0	0
178	36	2	1	2	2	1	3	4	1	4	4	4	4	4	2	2	2	3	1	3	3	2	2	3	2	2	3	3	3	3	3	3	3	3	3	2	2	2	3	3	3	3	3	3	1	3	1	1	1
179	38	1	2	2	2	2	4	4	2	4	4	4	4	4	4	1	5	2	1	5	5	5	5	5	1	1	3	2	3	2	3	3	4	3	2	2	4	4	4	3	2	4	4	4	5	3	0	1	0
180	30	2	1	2	1	1	3	4	1	4	4	4	4	4	1	1	1	1	1	1	4	1	1	3	1	1	3	2	3	2	4	1	1	1	3	2	3	1	2	3	3	2	1	2	1	3	1	1	0
181	37	2	3	2	2	2	3	1	1	4	4	4	4	4	3	2	2	2	2	2	2	2	2	2	3	3	5	5	3	2	5	3	2	2	4	2	4	2	2	3	3	2	2	4	2	3	1	1	1
182	39	2	1	2	2	1	4	4	1	3	4	4	5	4	3	3	3	4	3	3	3	2	3	3	2	2	4	2	3	1	3	1	2	3	2	2	1	2	2	3	4	2	1	4	2	4	0	1	0
183	32	2	1	2	1	1	2	4	1	3	3	3	3	3	3	3	3	2	2	2	2	4	4	4	2	3	2	3	1	2	3	3	4	4	2	4	2	2	3	2	2	2	2	3	4	4	1	1	1
184	24	2	1	2	2	1	1	1	1	4	4	4	4	4	4	3	3	3	3	3	4	4	4	4	2	2	3	4	4	3	3	3	3	3	3	3	3	3	4	3	3	3	4	4	4	4	0	1	1
185	28	2	1	2	2	2	4	4	1	4	4	4	4	4	2	3	3	3	1	2	3	3	3	3	2	2	3	3	4	3	4	3	3	3	3	1	3	1	1	1	1	2	3	3	3	3	1	1	1
186	35	2	1	2	1	2	1	5	1	4	4	4	4	4	2	2	2	2	1	2	2	2	2	4	2	3	3	2	3	1	5	2	2	2	3	2	1	1	2	1	2	2	2	1	2	4	0	1	1
187	30	2	1	2	2	1	2	4	1	4	4	3	4	4	2	2	2	2	1	2	2	2	2	3	2	2	3	2	3	2	3	2	2	1	2	2	3	2	2	3	3	1	2	3	2	3	0	1	1
188	42	2	1	3	2	1	2	4	1	4	4	4	4	4	4	4	4	4	4	4	4	4	4	4	4	4	1	2	2	2	2	1	2	2	2	2	1	2	2	2	2	2	2	2	2	2	2	1	1
189	35	2	2	3	1	2	3	5	1	4	4	4	4	4	2	2	3	2	1	2	2	2	3	4	2	2	3	2	2	2	4	4	2	3	3	2	2	3	2	4	3	2	2	3	2	3	0	1	0
190	33	1	1	1	2	1	2	4	1	2	3	4	3	3	2	2	1	4	1	2	2	2	1	4	2	2	1	2	2	1	4	2	2	2	4	2	4	2	2	4	4	2	2	4	2	4	1	0	0
191	38	2	1	2	1	1	3	4	1	4	5	4	4	4	2	2	2	3	2	2	2	2	3	3	2	3	4	2	3	1	4	4	2	4	4	2	4	2	2	2	3	2	2	1	2	4	1	0	1
192	37	2	1	2	1	2	3	4	2	3	3	3	3	3	3	1	2	3	3	3	3	3	3	3	1	1	4	1	3	1	5	1	1	3	3	2	3	2	2	3	3	2	2	3	2	3	1	2	2
193	54	1	1	2	2	1	1	1	2	4	4	4	4	4	4	4	3	3	3	4	4	1	1	3	1	1	5	1	5	1	5	1	1	1	5	1	5	1	1	5	5	1	1	5	5	5	2	2	2
194	26	2	1	2	1	2	3	2	1	5	5	5	5	5	1	1	1	2	1	2	2	2	2	2	2	2	4	2	2	2	4	2	2	2	4	2	3	1	2	3	4	2	2	3	2	3	0	0	0
195	41	2	1	2	1	1	3	2	2	1	1	1	1	1	1	1	1	1	1	1	1	1	1	1	1	1	1	1	1	1	1	2	1	2	1	1	1	1	1	1	2	2	1	1	1	2	0	0	0
196	34	2	2	2	1	2	4	4	1	5	5	5	5	5	3	3	3	3	1	2	3	3	3	2	2	2	3	3	3	2	4	2	3	3	3	3	3	2	2	3	5	2	3	3	3	3	0	1	1
197	23	2	1	2	2	1	1	5	1	4	4	4	3	5	2	2	4	2	2	4	3	3	2	2	2	2	4	1	1	1	4	1	1	1	4	1	1	1	1	1	1	1	1	4	1	1	0	0	0
198	33	2	1	2	1	1	3	4	1	3	4	3	4	3	4	5	3	2	3	3	3	2	3	5	3	2	3	5	4	3	3	3	3	3	3	5	5	4	5	5	5	4	5	4	3	3	2	2	3
199	46	2	3	2	2	2	4	4	1	4	4	4	4	4	2	2	3	4	2	4	2	3	4	4	2	2	3	2	2	1	3	2	2	4	4	2	4	2	2	3	3	3	2	4	2	4	1	1	0
200	35	2	1	2	1	1	3	4	1	4	4	2	4	4	2	2	2	2	1	3	2	3	4	3	2	2	4	2	4	2	4	4	3	3	3	3	3	2	3	3	3	3	3	3	3	3	0	1	1
201	42	2	1	2	1	1	3	3	1	4	4	4	4	4	2	2	2	2	1	1	2	1	2	3	1	1	4	4	2	2	4	2	2	2	2	1	4	2	2	1	4	2	2	1	2	4	1	1	1
202	42	2	1	1	1	1	4	4	1	4	5	4	4	4	2	2	2	2	2	2	2	4	4	4	2	3	2	3	1	2	3	3	4	4	2	4	2	2	3	2	2	2	2	3	4	3	1	1	1
203	27	2	2	2	1	2	1	2	2	1	1	1	1	1	3	3	4	2	1	3	3	2	5	2	2	2	3	1	3	1	3	2	1	3	3	1	3	1	3	4	3	1	1	3	2	3	1	1	0
204	33	2	1	3	1	2	1	1	1	3	3	3	3	4	2	3	2	2	1	2	2	2	3	3	2	2	3	2	2	2	4	2	2	2	3	3	3	2	2	2	3	2	2	2	3	3	1	1	0
205	35	2	1	2	2	1	1	4	1	5	5	3	5	4	4	5	4	5	1	4	5	3	4	4	4	4	5	1	1	1	1	1	1	1	1	1	1	1	1	1	1	1	1	1	1	1	0	1	0
206	39	2	1	2	2	1	4	4	1	2	2	4	2	4	2	2	2	2	1	2	2	2	2	2	2	2	4	1	4	2	4	4	2	1	4	2	2	2	1	1	1	1	1	2	1	1	0	0	0
207	30	2	1	2	1	1	3	4	1	4	4	4	4	4	3	3	3	3	3	3	3	5	5	1	1	1	2	2	2	2	2	2	2	2	2	4	4	2	2	2	2	2	2	2	2	2	0	1	1
208	47	2	2	2	3	2	4	2	1	4	5	5	4	5	2	2	2	2	1	2	3	4	4	2	4	4	5	1	5	1	5	1	1	5	5	1	5	1	5	5	5	1	1	5	1	1	0	0	0
209	41	2	1	2	1	2	4	3	1	3	3	3	3	3	2	2	2	3	2	3	3	3	3	3	2	2	2	2	2	2	3	3	3	2	3	3	3	2	2	2	3	3	2	2	5	4	1	1	3
210	44	2	2	2	1	2	4	4	1	3	4	2	4	4	4	4	4	2	1	3	4	4	4	4	2	2	4	2	2	2	4	4	5	4	4	4	4	5	5	5	5	4	4	4	4	4	1	1	0
211	27	1	2	1	2	2	3	5	1	4	3	4	3	3	2	4	3	2	1	3	3	2	3	4	3	3	3	2	2	4	3	3	3	4	2	4	2	3	4	3	2	2	3	3	4	2	1	1	2
212	33	2	1	1	1	1	2	4	1	4	4	3	4	4	2	2	2	2	1	4	2	3	3	2	2	2	3	2	3	2	3	4	4	2	4	4	2	2	3	2	4	3	3	2	4	4	1	1	1
213	37	2	1	2	2	1	1	4	2	4	4	3	4	3	1	3	4	1	3	3	4	4	3	3	3	4	1	1	1	1	1	1	1	1	1	1	3	1	1	1	3	1	1	1	3	1	0	0	0
214	36	2	1	2	1	1	4	3	1	3	3	3	3	3	3	3	3	3	3	3	3	4	3	1	1	1	3	3	3	1	3	1	1	1	1	1	1	1	1	1	1	1	1	1	1	1	0	0	0
215	42	2	1	2	1	2	1	2	1	4	4	4	4	4	2	2	4	4	1	4	4	2	2	4	2	2	3	3	3	3	4	4	3	3	3	3	3	3	3	3	3	3	4	4	4	4	1	1	1
216	26	2	1	2	2	1	1	1	2	5	5	5	5	5	5	5	1	5	5	5	5	1	5	5	5	5	3	3	3	3	1	1	1	1	1	4	4	4	4	3	4	2	3	4	2	4	0	0	0
217	29	2	1	3	1	1	1	4	1	4	4	4	4	4	1	1	1	1	1	1	3	1	1	3	1	1	4	1	4	2	4	1	1	1	1	1	4	1	1	1	4	1	1	4	3	4	1	1	0
218	41	2	1	2	2	2	4	4	2	3	4	3	4	3	2	1	1	1	1	1	1	1	1	1	1	1	1	1	1	1	1	1	1	1	1	1	2	1	1	1	1	1	1	1	1	1	0	0	0
219	38	2	1	2	2	2	4	4	1	3	3	3	3	3	2	2	2	2	2	3	2	2	2	4	2	2	3	2	3	2	3	3	2	2	3	2	3	3	2	2	3	2	2	2	2	3	0	0	0
220	46	2	2	2	1	2	2	3	1	4	4	4	4	4	3	3	3	3	3	3	3	3	3	3	3	3	3	3	3	3	3	3	3	3	3	3	3	3	3	3	3	3	3	3	3	3	2	2	2
221	38	2	1	1	1	1	3	4	1	3	3	3	3	4	3	3	3	3	1	3	4	4	4	4	1	1	3	2	3	2	3	2	2	1	3	3	2	3	1	3	3	2	2	2	2	3	1	0	1
222	41	1	3	2	2	2	2	4	1	5	5	5	5	3	2	3	1	1	1	4	1	1	1	2	3	3	5	1	5	1	5	1	1	1	5	1	5	1	1	5	5	1	1	5	1	5	0	0	0
223	33	2	1	2	2	1	3	4	1	4	4	4	4	4	2	2	2	4	1	3	3	2	2	3	3	4	4	4	4	4	4	4	3	3	3	3	4	1	2	2	3	3	3	3	3	3	0	0	0
224	32	2	1	2	1	1	3	4	1	4	4	4	4	4	2	2	2	4	1	2	2	2	2	2	2	2	4	2	4	2	4	2	2	2	4	4	4	2	2	2	4	2	2	4	2	3	0	0	0
225	36	2	1	2	1	2	1	5	1	3	4	3	3	3	3	3	3	3	1	2	2	2	2	3	2	2	1	2	3	2	4	2	2	2	4	2	1	2	2	3	4	2	2	2	2	2	1	1	0
226	37	2	1	2	1	1	4	4	1	4	4	3	4	4	2	2	2	2	1	2	2	2	3	3	2	3	4	1	3	1	3	3	3	3	3	3	3	1	3	3	3	3	2	3	3	3	1	1	1
227	32	2	1	2	2	1	1	4	1	4	5	4	4	4	2	2	2	4	1	3	3	2	2	3	2	3	1	1	1	1	1	1	1	1	1	1	1	1	1	1	1	1	1	1	1	1	0	0	0
228	35	1	1	2	4	2	4	3	1	5	5	5	5	5	2	2	2	2	1	1	1	1	5	2	5	5	4	1	1	1	2	2	2	2	4	1	4	1	1	4	5	1	1	1	1	4	0	0	0
229	26	2	1	1	1	1	2	5	1	4	4	4	4	4	2	2	2	2	1	2	2	2	2	2	2	2	4	2	2	2	2	4	2	2	2	2	3	2	2	2	4	2	2	2	2	2	0	1	1
230	46	2	2	2	3	2	4	1	1	5	5	4	4	4	2	2	2	3	1	3	2	1	2	2	4	4	4	2	4	1	4	2	2	4	4	4	4	2	1	3	3	1	1	3	2	4	1	0	1
231	30	2	1	2	2	2	1	1	1	3	3	3	3	3	3	3	3	3	3	3	3	3	3	3	3	3	1	1	1	1	1	1	1	1	1	1	1	1	1	1	1	1	1	1	1	1	2	2	1
232	23	2	1	1	1	2	1	4	1	4	4	4	4	4	3	3	3	3	1	3	3	3	3	3	2	2	3	2	3	2	4	3	2	2	3	2	3	2	2	3	3	2	2	3	2	3	1	1	1
233	29	2	1	2	2	1	3	4	2	4	5	5	4	4	1	2	1	2	2	3	3	3	2	3	3	3	3	3	3	3	3	3	4	3	3	4	3	3	3	3	3	2	3	3	2	3	1	1	1
234	39	2	1	2	1	1	3	4	1	4	4	4	4	4	2	2	2	4	3	3	4	3	3	3	2	2	3	3	3	3	4	3	3	4	4	1	4	1	3	3	3	3	1	3	3	3	1	1	1
235	32	1	2	2	2	2	3	5	1	4	4	3	3	4	2	3	2	2	2	3	2	2	3	3	2	2	2	2	2	2	3	2	2	2	2	3	3	2	2	3	3	3	3	3	3	3	0	1	1
236	39	2	1	2	1	1	3	4	1	4	4	4	4	4	2	2	2	4	2	4	2	2	2	4	2	2	4	1	4	1	4	2	2	4	4	4	4	2	2	4	4	4	4	4	4	4	0	0	0
237	35	2	1	2	1	1	3	4	1	4	4	4	4	4	4	2	2	4	2	4	2	2	2	4	2	2	4	4	4	2	4	2	2	4	4	4	4	2	2	4	4	4	4	4	4	4	0	0	0
238	39	2	1	2	2	2	1	1	1	4	5	4	4	4	1	3	4	3	1	3	3	3	4	4	1	1	2	2	4	2	3	4	3	2	3	3	3	3	4	2	4	4	3	2	3	3	0	1	1
239	30	2	1	2	2	2	4	4	1	4	4	4	4	4	2	2	2	2	2	2	2	2	2	2	2	2	4	2	2	2	4	4	2	4	4	2	3	2	4	2	4	4	2	4	2	4	1	1	1
240	38	2	2	2	1	2	3	2	1	4	4	3	3	4	4	4	3	2	1	3	2	2	2	2	2	2	3	3	3	3	3	3	3	3	3	3	3	3	3	3	3	3	3	3	3	3	1	1	1
241	35	2	1	3	2	1	1	4	1	5	5	5	5	3	4	5	3	3	4	2	4	3	4	3	5	3	1	1	1	1	1	3	2	4	2	4	2	4	2	3	2	4	3	2	3	4	1	2	1
242	41	2	1	2	2	2	2	2	2	4	4	4	4	3	4	3	3	3	3	4	4	3	3	3	3	2	3	3	2	3	3	3	3	3	3	3	3	3	3	3	3	3	3	3	3	3	1	1	1
243	29	2	1	3	2	1	1	4	1	4	4	3	4	3	2	2	2	2	1	4	3	3	3	4	2	2	3	2	2	1	3	4	3	4	3	3	4	2	2	3	4	3	2	3	3	3	1	1	1
244	29	2	1	2	1	1	3	5	1	5	5	2	5	4	2	1	1	4	1	4	2	1	1	5	3	2	5	4	4	1	5	3	1	3	3	1	4	1	3	3	3	3	1	1	2	5	1	1	1
245	40	2	1	2	1	1	4	2	1	4	4	4	4	4	2	4	2	4	1	2	2	2	2	4	1	2	4	1	3	1	4	2	1	2	4	2	4	2	2	2	3	2	2	2	2	4	0	1	1
246	32	2	3	2	2	2	3	1	1	4	4	4	4	4	3	3	3	3	1	3	3	3	3	1	2	3	3	2	3	2	4	3	2	3	3	2	2	2	2	2	3	2	3	3	2	3	1	1	1
247	26	2	1	2	2	1	1	4	1	4	4	4	4	4	2	2	2	2	1	2	3	3	3	4	1	1	3	2	3	2	3	2	3	3	3	3	3	2	4	4	3	3	3	3	3	3	1	1	1
248	39	2	1	2	2	1	2	4	1	4	3	2	3	4	2	2	2	2	1	2	2	2	3	4	2	2	4	4	4	2	4	3	2	4	4	2	2	2	2	3	4	2	2	2	1	3	1	1	1
249	34	2	1	1	1	2	2	1	2	5	5	5	5	5	4	4	5	5	1	5	5	5	5	5	5	5	4	2	4	1	4	1	1	1	1	1	1	2	1	4	4	1	2	1	2	1	0	0	0
250	41	2	1	2	1	1	3	4	1	4	4	4	4	4	3	3	4	3	2	3	3	3	3	4	2	2	4	2	2	2	5	3	4	4	4	4	4	1	4	4	4	4	2	3	4	5	1	1	1
251	47	2	1	2	2	1	2	4	1	4	4	4	4	4	4	4	4	4	4	4	4	4	4	4	4	4	4	4	4	4	4	4	4	4	4	4	4	4	4	4	4	4	4	4	4	4	0	0	0
252	26	2	3	2	3	2	4	1	1	4	5	4	3	5	4	1	5	2	1	4	4	3	4	1	2	2	4	2	3	2	4	3	2	2	3	2	4	2	3	4	4	2	2	3	3	2	1	1	1
253	44	2	1	2	2	1	3	4	1	4	4	2	3	3	3	2	2	2	1	3	2	3	4	4	2	2	3	2	2	2	3	2	3	3	2	2	3	2	2	4	4	4	2	2	2	2	1	1	1
254	46	2	1	2	2	2	4	4	1	3	3	3	3	3	3	3	3	3	1	2	2	2	2	3	2	2	3	2	3	2	4	3	3	3	3	3	3	2	3	2	3	2	3	2	2	3	0	1	1
255	49	1	2	2	2	2	4	4	1	3	3	3	3	3	1	1	2	2	2	3	3	2	3	3	2	3	3	3	3	2	3	3	3	3	3	3	3	2	2	3	3	3	3	3	2	3	1	1	1
256	35	2	3	2	2	2	4	1	1	4	4	4	3	4	2	4	4	2	1	4	2	2	3	1	4	3	3	2	2	3	3	3	2	4	2	2	2	2	3	2	3	2	2	3	2	2	1	1	1
257	33	2	1	2	2	1	1	1	1	3	3	3	3	4	3	3	3	3	5	3	3	3	1	3	2	2	3	2	2	3	4	2	2	3	3	2	3	2	2	3	3	3	2	4	3	4	1	1	1
258	41	2	1	2	1	1	4	5	1	3	3	3	3	3	4	3	3	3	3	1	4	3	3	3	1	2	1	4	3	3	4	4	4	4	4	3	3	3	4	3	4	2	4	2	4	4	0	1	0
259	37	2	1	2	1	1	4	4	2	4	4	4	4	4	4	3	2	4	3	4	2	2	4	2	2	2	3	3	3	3	3	3	4	2	2	2	3	4	3	3	2	3	2	2	3	2	1	1	1
260	26	2	1	3	2	1	4	4	2	3	3	3	3	3	3	3	3	3	3	3	3	3	3	3	4	4	4	2	4	3	4	3	3	4	4	4	3	4	3	3	3	2	3	3	3	2	1	1	1
261	39	2	1	3	1	1	4	4	2	3	5	3	3	3	3	3	3	3	2	2	3	3	3	2	3	2	3	2	3	2	3	4	4	4	4	2	4	2	2	2	4	2	2	4	4	4	1	1	1
262	27	1	3	2	2	2	1	2	1	5	5	5	5	3	3	3	3	3	3	3	3	3	3	3	3	3	3	3	3	3	3	3	3	3	3	3	3	3	3	3	3	3	3	3	3	3	0	0	0
263	41	2	1	2	1	1	4	4	1	4	4	4	5	4	4	3	2	3	2	3	3	3	3	3	2	2	4	2	3	2	4	2	2	3	4	2	3	2	2	3	3	2	2	3	2	3	0	1	1
264	36	2	1	2	2	1	4	4	1	1	4	4	2	4	2	4	4	2	2	4	4	2	4	4	2	2	5	2	4	2	4	2	5	1	4	4	2	4	3	4	4	2	2	4	4	2	1	1	1
265	27	2	1	2	1	1	1	1	1	4	4	4	4	4	3	3	3	2	1	4	3	3	4	4	2	2	4	3	2	2	4	5	3	3	3	2	4	3	3	3	4	2	3	4	3	4	1	1	1
266	44	2	1	2	1	1	4	1	1	3	3	3	3	3	2	2	2	2	1	4	1	5	3	1	1	1	3	2	3	2	3	3	2	2	2	2	2	4	2	4	4	2	2	4	4	2	1	1	2
267	26	2	1	2	1	1	2	4	1	4	4	4	4	4	2	2	2	2	2	2	2	2	2	2	2	2	4	2	2	2	4	2	2	2	4	2	2	2	2	4	4	2	2	4	2	4	1	1	0
268	23	2	1	2	2	1	2	2	2	4	4	4	4	4	4	4	4	4	4	4	4	2	4	4	4	4	4	4	3	4	3	2	3	4	3	4	4	3	4	2	2	2	2	4	3	4	1	2	1
269	26	2	1	2	1	2	3	4	1	3	3	3	3	3	2	2	3	2	1	3	3	4	4	5	3	3	4	1	2	1	5	2	3	4	4	2	3	1	2	3	3	2	3	3	2	5	1	1	1
270	43	2	2	2	3	2	4	1	1	4	4	4	4	4	1	4	1	4	1	1	1	1	3	1	4	4	5	1	5	1	5	1	3	5	5	5	5	1	1	5	5	1	1	5	5	5	0	0	0
271	37	2	1	2	1	1	4	4	1	3	3	3	3	3	2	1	1	1	1	1	1	1	1	1	1	1	5	1	3	2	5	1	1	2	5	2	4	2	2	3	3	2	2	2	2	4	0	1	1
272	31	2	1	2	2	2	2	1	1	4	4	4	4	4	2	2	3	3	2	3	3	4	4	2	4	3	3	3	4	3	4	3	3	3	4	3	4	3	2	3	4	3	2	4	3	4	1	1	1
273	33	2	1	2	2	1	2	4	1	5	5	3	3	3	3	2	2	2	1	2	2	2	2	4	2	3	4	2	4	2	4	1	3	3	3	2	4	2	1	4	4	2	2	2	3	5	1	1	0
274	35	1	1	2	1	2	3	5	2	3	4	4	3	4	3	3	3	4	3	4	4	4	4	4	4	4	3	3	3	3	1	3	1	2	3	1	3	2	3	3	2	3	2	1	2	2	1	1	1
275	42	2	2	2	2	1	4	4	1	3	4	4	4	3	2	3	3	3	1	3	3	3	3	3	3	3	4	2	2	2	4	2	2	2	4	4	4	2	2	3	3	3	2	3	3	3	0	1	1
276	37	2	1	2	1	2	4	4	2	1	4	2	3	4	1	1	1	2	2	2	3	1	3	1	2	1	2	1	2	1	3	4	2	2	2	2	2	1	2	2	1	1	2	1	3	4	1	0	0
277	35	2	1	2	1	1	2	4	2	4	4	4	4	4	4	4	4	4	4	4	3	3	4	4	4	4	2	2	2	2	2	2	2	2	2	2	2	2	2	2	2	2	2	2	2	2	1	1	0
278	32	2	1	2	1	1	1	4	1	4	4	4	4	4	4	4	4	4	4	4	4	4	4	4	4	4	2	2	2	2	2	2	2	2	2	2	2	2	2	2	2	2	2	2	2	2	0	0	0
279	54	1	3	2	2	2	4	2	1	5	5	5	5	5	5	2	2	2	2	2	5	2	5	5	5	5	5	1	5	1	4	2	2	4	5	1	4	2	1	4	4	2	2	2	2	4	0	0	0
280	24	2	1	2	2	2	4	4	1	4	4	4	4	4	2	3	4	2	2	3	3	3	4	4	2	2	4	2	3	2	4	2	2	4	4	2	4	2	2	4	4	2	4	2	4	4	1	1	1
281	32	2	3	2	1	2	3	1	1	3	3	3	3	3	3	3	3	3	1	3	3	3	3	3	3	3	3	2	3	2	3	3	1	2	3	3	1	1	2	3	3	2	2	1	3	3	1	1	1
282	31	2	2	2	2	2	3	1	1	4	4	4	4	4	2	2	2	2	1	2	2	2	2	2	2	2	3	2	2	2	4	2	2	2	3	2	3	3	2	3	3	2	2	3	3	3	1	1	1
283	35	2	1	1	2	2	4	4	1	4	4	4	4	4	2	3	4	2	1	2	3	3	4	5	2	2	4	1	4	1	4	4	4	3	4	3	2	1	1	3	4	2	2	4	4	4	1	1	0
284	33	2	1	3	2	2	2	4	1	4	4	4	4	4	2	3	3	2	1	2	3	3	4	5	2	3	3	2	3	2	3	2	3	3	3	2	3	2	2	3	4	2	2	3	2	3	1	1	0
285	29	2	3	2	2	2	3	1	1	3	3	3	3	4	3	3	3	3	1	2	2	2	2	2	3	3	3	2	3	2	3	2	3	3	3	3	3	2	3	2	3	3	3	2	3	2	1	1	1
286	33	2	3	2	2	2	3	1	1	4	4	4	4	4	2	2	2	2	1	3	2	2	2	2	4	4	4	1	4	1	4	1	1	1	4	1	4	1	1	4	4	1	1	4	1	1	0	0	0
287	33	1	3	2	2	2	3	4	2	4	4	4	4	3	3	3	3	2	1	3	2	2	2	3	3	3	4	4	4	4	4	4	4	4	4	4	4	4	4	4	4	4	4	4	4	4	3	1	1
288	22	2	1	2	2	1	2	4	1	5	5	1	5	4	1	1	1	4	1	3	1	1	2	4	1	1	4	1	4	1	4	1	1	1	4	4	4	1	1	3	4	1	1	1	1	1	0	0	0
289	37	2	3	2	2	2	3	1	1	4	4	4	4	4	2	2	2	2	1	2	2	2	3	2	3	3	4	2	4	2	4	3	2	4	4	4	4	4	2	4	4	2	2	4	4	2	1	1	1
290	44	2	2	2	2	2	4	1	1	3	4	3	2	4	4	2	3	4	2	3	5	4	4	3	3	5	4	5	3	4	3	5	3	5	2	5	3	5	3	5	1	3	1	4	2	5	2	3	1
291	32	2	1	2	1	1	1	4	1	5	5	4	5	4	2	2	2	2	2	2	2	2	3	4	1	1	4	4	4	4	4	4	4	4	4	4	4	4	4	4	4	4	4	4	4	4	2	1	1
292	26	1	3	1	3	2	1	3	1	5	5	5	5	5	5	5	5	5	5	5	5	1	5	5	5	5	3	2	2	2	2	2	2	2	3	2	3	2	2	3	3	3	3	2	2	3	0	0	0
293	35	2	2	2	2	2	4	2	2	4	4	4	4	4	4	4	4	2	1	4	4	4	4	4	4	4	2	4	2	2	4	4	4	4	4	4	4	4	4	4	4	4	4	4	4	4	1	1	1
294	40	2	1	2	3	2	4	2	1	4	4	4	4	4	4	4	4	4	4	4	4	4	4	4	4	4	4	4	4	4	4	4	4	4	4	4	4	4	4	4	4	4	4	4	4	4	1	1	1
295	37	2	3	2	2	2	3	1	1	4	4	4	4	4	4	4	4	4	4	4	4	3	4	2	4	4	3	3	2	1	3	3	3	3	3	3	2	2	3	3	3	3	3	3	3	3	2	2	1
296	32	2	1	3	2	1	1	4	1	4	4	4	4	4	3	2	2	1	1	3	2	2	3	3	3	3	1	1	5	1	5	1	1	1	5	1	4	1	1	4	4	1	1	5	1	5	0	0	0
297	46	2	1	2	2	2	4	5	1	4	4	4	4	4	4	4	4	4	4	4	4	4	4	4	4	4	4	4	4	4	4	4	4	4	4	4	4	4	4	4	4	4	4	4	4	4	1	1	1
298	33	2	1	2	1	1	3	4	1	3	3	3	3	3	3	3	3	3	2	3	3	3	3	3	3	3	1	1	1	1	1	1	1	1	3	1	1	1	1	1	1	1	1	1	1	1	0	1	1
299	36	2	3	2	3	2	3	2	2	4	4	4	4	4	2	3	3	3	1	3	2	3	3	4	4	4	2	3	2	3	4	4	4	4	4	2	4	2	2	4	4	3	2	3	2	3	1	1	1
300	27	2	1	1	1	1	1	4	1	4	4	4	4	4	2	2	2	2	1	2	2	2	2	2	2	2	5	2	4	5	5	2	5	2	5	2	1	2	2	5	5	2	2	4	2	5	0	0	0
301	50	1	2	2	2	2	4	1	1	4	4	4	4	4	2	2	2	2	1	2	3	3	4	2	2	2	3	2	3	2	3	2	2	2	3	2	3	2	2	3	3	2	3	3	3	2	0	1	1
302	40	2	3	2	2	2	4	1	1	1	1	1	1	1	2	1	4	2	2	4	2	2	2	2	2	4	3	2	2	2	3	3	3	2	3	2	2	1	2	3	3	2	2	3	2	3	1	1	2
303	38	2	1	2	2	2	4	4	2	3	3	3	3	3	3	3	3	3	1	3	3	3	3	3	1	1	3	1	3	4	4	4	4	4	4	4	4	2	2	4	4	4	2	4	1	4	3	3	3
304	36	1	3	3	3	2	4	2	1	4	4	4	4	3	3	3	3	2	2	4	3	3	3	2	2	2	3	2	3	2	3	3	2	3	3	2	3	2	2	3	3	2	2	3	3	3	1	1	1
305	30	2	3	2	2	2	3	2	1	3	3	3	3	3	3	3	3	4	4	4	4	1	1	1	1	3	3	1	1	1	3	1	1	1	3	1	1	1	1	1	1	1	1	1	1	1	0	0	0
306	43	2	3	2	2	2	3	1	1	4	4	4	4	4	1	1	1	1	1	1	1	1	1	1	1	1	4	4	4	4	4	4	4	4	4	4	4	4	1	1	1	1	1	1	1	1	0	0	0
307	36	2	3	2	2	2	4	2	1	4	4	4	4	4	4	4	4	4	2	4	4	2	4	4	2	2	4	1	1	2	4	3	2	4	4	2	2	2	2	4	4	2	2	4	4	4	1	1	0
308	36	2	3	2	4	2	4	1	1	4	4	3	4	4	4	4	4	2	1	1	2	1	3	1	4	4	4	2	2	2	3	2	2	2	3	2	3	2	2	3	3	2	2	3	3	2	1	1	1
309	32	2	2	2	2	2	2	1	2	4	4	4	4	4	2	2	2	2	1	2	2	2	2	2	4	4	1	4	4	4	5	2	4	4	4	4	3	4	4	4	4	4	4	4	4	4	0	0	0
310	26	2	2	1	2	2	3	1	1	4	4	4	4	4	4	4	3	3	3	3	4	4	4	3	2	1	4	4	4	3	4	4	4	4	5	4	4	2	2	4	4	3	4	4	4	4	2	2	1
311	32	2	3	2	2	2	3	1	1	4	4	4	4	4	2	2	2	2	2	4	2	2	3	2	3	3	3	2	2	3	3	3	3	3	3	3	3	2	2	3	3	2	3	3	3	3	2	2	2
312	33	2	3	2	3	2	4	1	1	4	4	4	4	4	2	2	2	2	1	2	2	2	2	2	3	3	4	2	2	2	3	2	2	2	3	3	3	3	2	3	3	3	2	3	3	3	0	1	1
313	38	1	3	1	4	2	4	2	1	4	4	4	4	4	2	2	2	2	2	2	2	2	2	2	4	4	3	3	3	3	3	3	3	3	3	3	3	3	3	3	3	3	3	3	3	3	0	0	0
314	31	1	2	1	2	2	4	1	1	5	5	5	5	5	5	5	5	5	5	5	5	5	5	5	5	5	5	5	5	5	5	5	5	5	5	5	5	5	5	5	5	5	5	5	5	5	0	0	0
315	32	1	2	2	3	1	3	3	1	3	4	3	3	3	3	2	4	2	1	2	3	3	3	3	2	2	4	2	4	2	4	4	4	2	2	2	4	2	4	4	4	2	2	4	4	4	1	1	1
316	40	1	2	2	3	1	3	3	1	3	4	2	4	3	4	4	3	3	2	4	2	2	2	4	3	2	1	1	1	1	1	1	1	1	1	1	5	1	1	5	5	5	5	5	5	5	0	1	2
317	32	1	2	2	3	2	3	2	1	4	5	4	5	5	4	2	4	2	3	2	4	4	3	4	4	4	1	2	2	3	2	2	3	3	3	2	3	2	3	3	2	3	3	3	3	2	1	2	1
318	42	1	2	2	4	1	4	2	1	4	4	4	4	4	2	2	2	2	1	2	5	5	4	4	2	2	5	1	1	1	5	1	2	2	4	2	4	2	2	2	4	2	2	2	2	2	1	1	1
319	24	1	2	2	3	1	1	4	1	3	4	3	3	4	3	3	4	3	1	3	3	3	3	3	2	2	4	2	3	2	4	2	2	4	4	2	4	2	2	4	4	2	2	4	2	3	0	0	1
320	31	1	3	2	4	2	3	3	1	3	4	4	4	4	4	2	2	2	1	2	2	2	2	4	1	3	3	2	4	2	4	2	2	4	3	4	4	3	4	4	3	4	1	1	1	1	1	0	0
321	21	1	2	1	3	1	2	3	1	4	4	4	4	4	2	4	2	2	1	2	2	2	2	4	2	4	4	2	3	2	4	1	1	1	4	1	4	1	1	4	4	1	1	4	1	3	0	1	0
322	42	1	2	2	3	2	2	4	1	5	5	5	5	5	5	1	1	1	1	1	1	4	4	1	1	1	5	1	1	1	5	1	1	3	5	1	5	5	1	5	5	1	1	3	1	1	0	0	0
323	34	2	2	2	3	1	2	3	1	4	4	4	4	3	2	2	2	3	1	2	2	2	3	3	2	1	4	3	4	2	4	4	3	4	4	2	3	3	2	3	3	2	2	4	4	4	0	0	0
324	40	1	2	2	3	1	3	2	1	3	4	3	4	4	2	3	3	3	1	3	3	3	3	4	2	2	3	1	2	2	5	3	3	3	4	3	3	2	2	4	4	2	2	4	3	3	1	1	1
325	38	1	2	2	2	1	3	2	1	4	4	4	4	3	2	2	2	2	2	3	2	2	2	4	2	4	5	2	1	1	3	1	1	1	3	1	3	1	1	3	3	1	1	1	1	1	0	0	1
326	30	2	3	2	2	1	2	2	1	4	4	1	4	4	3	2	2	2	1	2	2	3	3	3	2	2	4	2	4	2	4	2	2	2	4	2	4	2	2	4	4	1	2	4	1	3	1	1	0
327	40	1	2	2	3	1	2	3	1	3	3	3	3	5	3	5	4	3	5	3	3	5	4	5	3	4	3	4	3	4	3	3	4	3	5	4	4	4	3	4	4	4	5	4	4	4	2	3	2
328	32	1	2	2	3	1	3	2	1	3	1	3	4	4	4	4	3	4	4	3	3	3	2	4	1	4	2	2	3	2	2	4	2	3	3	2	3	3	2	2	3	2	2	2	3	3	1	1	2
329	32	2	2	2	3	1	2	3	1	4	5	4	4	4	1	2	2	4	1	2	2	2	2	2	2	2	5	1	5	1	5	1	1	5	5	1	5	1	1	5	5	5	1	5	5	5	0	0	0
330	33	1	2	2	3	1	2	3	1	3	3	3	3	3	2	2	2	2	2	3	3	2	3	3	2	2	2	3	2	2	3	4	2	4	2	4	2	2	3	2	3	2	3	3	3	2	0	1	1
331	43	1	1	2	3	1	2	4	1	3	3	3	3	3	2	2	3	2	1	2	4	2	2	2	1	1	5	1	5	1	5	2	1	5	5	1	3	2	4	4	4	2	4	4	4	4	1	1	1
332	33	2	3	1	2	1	2	2	1	4	4	4	4	4	4	4	4	4	4	4	3	3	3	3	1	3	3	3	3	3	3	3	3	3	3	3	3	3	3	3	3	3	3	3	3	3	0	0	0
333	23	1	3	1	2	1	1	2	1	4	4	4	4	4	1	1	1	1	1	4	3	1	3	3	1	1	4	1	4	1	5	1	1	2	5	2	5	5	1	5	5	1	1	1	1	1	0	0	1
334	49	1	1	2	4	1	3	3	1	5	5	3	3	2	3	3	4	3	1	5	4	4	5	5	3	3	1	2	3	2	3	3	3	3	3	1	1	4	2	3	3	3	2	1	3	5	1	1	1
335	47	1	2	2	3	1	4	3	1	2	1	2	3	2	2	1	3	3	2	3	1	3	3	3	3	3	1	2	2	2	2	2	2	2	2	1	1	1	2	1	1	1	1	1	1	1	0	0	0
336	26	1	2	1	3	1	2	3	1	4	4	4	4	4	2	2	2	2	1	2	2	2	2	4	4	4	4	2	2	2	4	4	4	4	4	4	4	2	2	4	4	4	2	4	2	4	0	0	0
337	36	1	2	2	2	2	4	3	1	5	5	5	5	4	2	2	2	2	1	3	1	1	4	4	2	2	3	2	3	2	4	2	2	4	4	2	4	2	2	4	4	2	2	3	2	4	1	1	1
338	54	1	1	2	3	1	3	3	1	4	5	4	4	4	3	3	2	4	1	4	3	3	3	3	1	3	3	3	2	2	3	3	3	3	3	3	3	3	3	3	3	3	3	3	3	3	1	1	1
339	41	2	1	2	2	1	2	3	1	2	3	3	2	3	3	3	3	3	1	3	3	3	3	3	2	1	4	4	1	1	4	4	4	4	4	4	4	1	2	3	3	4	4	4	4	4	1	1	1
340	52	1	2	2	3	1	4	2	1	5	4	4	5	4	3	3	2	5	1	4	4	2	4	3	3	3	5	1	4	1	5	2	1	5	4	1	5	1	1	4	4	1	1	5	1	4	0	0	0
341	55	1	1	2	3	1	2	4	1	3	3	2	3	3	4	2	3	2	1	3	3	3	3	3	2	1	3	3	3	3	3	3	2	2	2	2	2	3	3	3	2	2	2	2	2	3	2	2	1
342	25	1	2	1	3	1	2	3	1	4	4	1	4	4	2	2	2	4	2	2	2	2	3	3	2	2	3	2	2	2	3	3	2	2	3	2	3	2	3	3	3	2	2	2	2	2	1	1	1
343	26	1	2	1	3	1	2	3	1	4	4	4	4	4	4	2	2	2	1	2	2	2	2	2	2	2	4	2	4	2	4	2	2	2	4	3	3	2	3	3	3	2	3	2	3	3	1	1	1
344	51	1	1	2	3	1	3	4	1	1	3	1	1	3	4	3	4	3	1	3	2	2	3	3	2	2	2	3	3	3	2	3	3	2	2	2	2	3	3	2	2	3	3	3	3	3	2	1	1
345	34	1	2	2	3	1	3	4	1	2	3	3	2	3	4	2	4	2	2	2	2	2	2	4	2	2	4	1	4	2	4	2	2	2	4	2	2	2	2	3	3	2	2	3	2	2	1	1	1
346	33	1	2	2	3	2	3	3	1	5	5	4	4	4	3	3	3	2	1	3	1	1	4	1	3	1	4	2	2	2	3	2	2	3	3	2	2	2	2	3	3	2	2	2	2	2	1	1	1
347	47	1	2	2	4	1	3	4	1	4	4	4	4	4	1	1	1	3	1	1	4	1	4	3	1	1	2	2	2	2	5	2	2	2	4	2	1	2	2	4	1	1	1	2	1	1	1	1	0
348	48	1	2	2	3	1	4	2	1	4	4	1	4	4	1	1	4	1	1	1	1	1	2	2	1	1	5	5	5	1	5	1	1	1	5	1	5	1	1	5	5	1	1	3	1	3	0	0	0
349	46	1	1	2	3	1	2	4	1	4	4	4	4	4	2	4	3	2	2	2	2	3	3	3	3	3	4	1	3	2	4	2	1	3	4	1	4	1	3	4	4	1	2	3	1	4	1	1	0
350	46	1	1	2	3	1	2	4	1	2	4	4	3	5	3	3	4	1	1	1	3	1	3	3	2	1	3	2	4	2	4	3	2	4	4	2	4	2	1	4	4	4	4	4	4	4	1	1	0
351	44	1	1	2	3	1	3	3	1	3	4	3	3	3	3	3	3	3	3	3	3	3	3	3	1	3	3	3	3	3	3	3	3	3	3	3	3	3	3	3	3	3	3	3	3	3	1	1	1
352	20	2	2	1	3	1	2	4	1	4	4	4	4	4	2	4	2	4	1	4	4	4	4	3	2	2	5	1	3	2	4	2	2	2	5	2	2	2	2	3	4	2	2	4	2	4	0	1	0
353	50	2	1	2	2	1	4	3	1	3	4	3	3	4	2	2	2	2	1	2	2	2	2	2	2	2	4	3	2	4	3	3	4	3	3	4	3	4	4	3	3	4	3	4	2	3	2	3	1
354	34	1	2	2	3	1	4	3	1	5	5	5	5	5	1	1	1	1	1	4	3	1	4	1	1	1	1	1	1	1	5	1	1	5	5	1	5	1	1	5	5	1	1	1	1	5	0	0	0
355	38	1	2	2	3	1	2	4	1	4	4	4	4	4	2	2	2	2	2	2	2	2	2	4	2	2	3	1	4	1	4	2	1	2	4	3	4	1	2	2	4	2	4	2	2	4	1	0	0
356	51	1	1	2	3	1	2	4	1	5	5	5	5	5	1	2	2	2	2	3	3	2	3	3	2	2	3	1	3	1	5	5	5	5	3	5	2	2	2	3	3	3	3	3	2	3	1	1	1
357	56	1	1	2	3	1	4	4	1	3	4	4	4	4	1	2	2	2	2	3	4	2	4	4	2	2	4	1	3	1	4	1	2	4	4	3	3	1	2	2	4	2	2	2	2	3	0	0	0
358	50	2	1	2	2	1	4	2	1	4	4	4	4	4	2	2	2	2	1	2	2	2	2	2	2	2	3	2	3	2	3	3	3	3	3	3	3	2	2	3	3	3	2	3	2	3	1	1	1
359	51	1	2	2	3	1	2	2	1	4	4	4	4	4	4	4	4	3	4	4	4	4	4	4	4	4	4	4	4	4	4	4	4	4	4	4	4	4	4	4	4	4	4	4	4	4	0	0	0
360	44	1	2	2	4	1	2	2	1	3	3	3	3	3	3	4	3	3	3	3	3	3	3	3	1	3	3	2	4	2	3	2	2	3	3	2	4	2	2	3	3	3	3	3	3	3	3	3	3
361	25	1	2	1	3	1	2	2	1	4	4	4	4	4	2	3	3	4	1	5	4	3	3	3	2	2	3	2	2	2	4	2	2	2	3	3	3	2	3	3	3	3	3	3	3	3	1	1	1
362	30	1	2	2	3	1	2	2	1	3	4	3	3	4	2	2	1	1	2	2	4	3	2	1	2	3	3	1	4	2	4	4	1	4	1	1	1	1	1	1	1	1	1	1	1	1	1	1	1
363	34	2	2	2	3	1	2	2	1	3	3	3	3	3	3	3	3	3	3	3	3	3	3	3	1	3	3	3	4	2	4	2	2	2	4	2	4	2	2	2	2	2	2	4	4	4	1	1	2
364	49	2	1	2	2	1	3	2	1	3	3	4	3	3	3	5	5	3	5	3	5	5	5	5	1	1	3	3	3	3	3	3	3	3	3	3	3	3	3	3	3	3	3	3	3	3	1	1	1
365	52	1	1	2	4	1	4	3	1	4	4	2	2	4	5	5	2	2	1	4	3	1	4	4	3	3	4	2	4	2	4	2	1	5	5	1	5	5	2	4	5	5	2	4	2	5	3	1	1
366	21	2	3	2	2	1	2	2	1	5	5	4	4	4	2	2	2	4	1	4	2	2	2	4	2	4	5	1	4	1	4	2	2	4	4	2	4	2	2	4	4	2	2	4	2	4	1	1	1
367	48	1	2	2	3	1	4	2	1	4	5	4	4	4	3	2	2	2	1	4	2	2	4	4	2	2	4	2	4	2	4	3	2	4	4	2	3	2	4	3	4	2	4	4	4	3	1	1	1
368	20	1	2	2	2	1	2	2	1	2	3	1	1	4	4	4	4	4	1	4	4	5	5	4	1	1	2	4	2	4	4	4	4	4	4	4	2	4	4	4	4	4	4	4	4	4	1	2	2
369	34	1	2	2	3	1	2	3	1	5	5	5	5	5	5	5	5	3	1	3	2	2	3	4	3	2	5	1	5	1	5	1	1	1	4	1	1	1	1	3	3	3	1	1	1	1	1	1	0
370	47	1	2	2	3	1	4	3	1	4	5	4	4	4	3	1	4	1	1	1	1	2	2	1	1	4	1	2	1	1	4	2	2	2	2	2	4	2	1	2	3	2	2	2	2	2	1	1	1
371	20	1	1	1	2	1	2	2	1	5	5	5	5	5	1	2	3	3	1	5	2	2	3	3	2	2	3	2	2	3	2	3	3	3	3	3	3	2	3	2	3	2	2	3	2	2	1	2	1
372	49	2	3	2	3	1	2	3	1	4	4	4	4	4	2	2	2	2	1	2	2	2	3	4	2	2	4	1	4	1	4	1	1	1	4	1	4	1	1	4	4	1	1	4	1	4	1	0	1
373	34	1	2	2	2	1	2	2	1	3	4	3	3	3	3	3	3	3	1	3	3	3	3	3	3	2	3	3	2	3	4	2	3	2	2	2	2	2	2	2	2	2	3	3	3	3	1	1	1
374	39	1	2	2	3	1	2	2	1	4	3	3	4	3	3	3	4	2	1	3	4	4	4	4	2	2	3	3	2	3	3	3	2	2	2	4	2	4	2	3	2	3	2	2	2	2	2	2	2
375	41	1	2	2	3	1	2	2	1	4	4	4	4	4	4	4	4	3	3	3	3	3	3	4	4	4	1	1	1	1	1	1	1	1	1	1	1	1	5	1	1	1	1	1	1	1	1	0	0
376	46	1	2	2	3	1	2	3	1	4	4	4	4	4	4	4	4	4	1	4	3	4	3	4	4	4	4	4	1	2	2	1	1	1	1	1	4	4	4	2	4	4	1	2	2	1	1	1	1
377	36	1	3	2	3	1	2	2	1	4	4	4	4	4	2	2	2	2	1	2	2	2	2	4	2	2	4	2	3	2	4	4	4	4	4	4	4	2	4	4	4	2	2	4	2	4	1	1	1
378	40	1	2	2	3	1	2	3	1	4	4	3	3	4	2	3	3	3	1	2	2	3	2	4	1	3	3	2	3	2	3	3	3	3	3	2	2	3	2	2	3	2	2	3	3	3	0	0	1
379	52	1	2	2	3	1	2	3	1	4	4	4	4	4	5	4	4	4	5	4	4	4	4	3	2	2	1	1	2	1	1	1	1	2	2	1	4	1	1	1	1	1	1	1	1	1	1	1	1
380	41	1	3	2	4	2	2	1	1	3	4	4	4	4	2	2	2	2	1	2	2	3	2	4	2	2	4	2	3	1	5	2	2	2	3	2	4	2	2	3	4	2	2	2	2	4	1	1	1
381	27	1	2	1	3	1	2	2	1	3	3	4	3	3	4	2	2	2	1	2	2	2	2	4	2	2	4	2	3	2	4	2	2	2	3	2	3	2	3	3	3	2	2	2	2	4	1	1	1
382	20	1	2	1	2	1	2	3	1	3	4	3	3	3	2	2	2	2	1	2	2	2	2	4	2	2	4	2	3	1	5	2	2	2	3	2	4	2	2	3	3	2	2	2	2	4	1	1	1
383	22	2	2	1	2	1	2	2	1	3	4	3	3	3	2	2	2	2	1	2	2	2	2	4	2	2	4	2	3	1	5	2	2	2	3	2	3	2	2	3	3	2	2	2	2	3	1	1	1
384	51	1	2	2	3	1	2	3	1	3	4	4	3	4	2	2	2	2	1	4	2	3	3	3	2	2	3	2	2	1	5	2	2	2	3	3	5	2	3	3	5	2	2	3	3	3	1	1	0
385	43	2	2	2	3	1	2	2	1	3	3	3	3	2	2	2	2	2	2	2	2	2	4	4	2	2	5	1	3	1	5	1	1	2	4	2	2	2	2	3	4	2	2	4	2	4	0	1	0
386	35	2	2	2	3	1	2	3	1	3	3	2	3	3	4	3	4	4	3	3	4	4	4	4	3	3	3	3	3	4	3	4	3	4	2	2	2	3	3	3	4	3	3	2	2	2	1	1	1
387	22	1	1	1	2	1	2	3	1	1	1	1	1	3	5	4	5	3	1	5	5	5	5	5	2	2	1	5	1	5	1	5	5	5	1	5	3	5	5	1	3	5	5	1	5	1	2	3	3
388	33	2	2	2	3	1	2	3	1	4	4	4	4	4	4	2	4	4	2	4	4	4	4	4	2	2	3	3	1	1	4	4	3	3	3	2	3	3	3	3	3	3	3	3	3	3	1	1	1
389	52	1	2	2	3	1	2	3	1	4	4	4	4	4	2	2	2	4	2	4	3	4	3	4	3	2	3	2	2	1	5	5	3	5	4	5	5	3	3	3	3	5	2	5	5	3	1	1	1
390	41	1	1	3	4	1	3	5	1	3	3	3	3	3	4	5	3	3	3	3	3	4	4	3	2	3	4	3	2	2	4	4	4	5	5	5	5	2	3	5	5	5	2	4	4	5	0	1	0
391	22	1	3	1	2	1	2	2	1	4	4	4	3	3	3	3	3	3	1	3	3	3	4	4	3	3	4	2	4	2	4	2	2	1	4	2	3	2	2	3	4	2	2	2	2	3	1	0	1
392	27	2	2	2	3	1	3	4	1	4	4	4	3	4	5	4	3	4	1	3	5	2	4	5	1	1	3	2	1	1	3	1	1	1	3	1	3	1	1	1	1	1	1	1	1	1	1	1	0
393	33	1	3	2	3	1	3	3	1	4	4	3	3	4	3	4	3	1	1	1	2	3	4	4	1	1	1	1	2	1	2	2	2	4	2	1	1	1	1	1	1	1	1	2	2	2	1	1	0
394	32	1	3	2	4	2	1	2	1	4	5	4	4	4	3	4	4	4	1	1	1	4	4	4	1	1	4	3	2	2	3	4	4	4	4	4	4	3	3	3	4	3	4	1	4	3	1	1	3
395	28	1	2	1	3	1	3	2	1	4	4	4	4	4	3	2	2	2	1	2	2	2	2	4	2	2	3	2	2	2	4	2	2	2	4	2	2	2	2	4	4	2	2	4	4	4	1	1	1
396	26	1	3	1	4	2	2	2	1	4	4	4	4	4	4	2	2	2	2	3	2	2	3	3	2	2	4	2	3	2	3	2	3	3	3	3	3	2	3	3	3	2	3	3	4	4	1	1	1
397	37	1	2	2	3	1	2	3	1	4	4	3	3	4	3	2	4	3	1	3	4	5	5	5	2	2	3	2	3	2	4	2	2	2	3	2	3	2	2	3	3	3	3	3	3	3	1	1	0
398	22	1	2	1	2	1	2	3	1	2	4	3	3	4	2	3	3	4	1	3	3	4	4	4	3	4	3	2	4	3	4	3	3	3	3	4	3	3	3	3	3	4	4	3	3	3	1	2	2
399	24	1	2	1	3	1	2	2	1	4	4	4	4	4	3	1	4	1	1	1	1	3	2	4	1	1	4	1	4	1	4	1	1	1	4	1	4	1	1	4	4	1	1	4	4	4	0	0	0
400	44	1	2	3	3	1	2	2	1	5	5	5	5	5	1	1	1	1	1	1	1	1	4	1	3	1	3	2	4	2	3	2	2	3	3	2	3	2	2	3	3	2	2	3	2	3	0	0	0
401	31	1	3	2	4	1	2	3	1	1	1	1	1	1	1	1	4	1	5	5	1	5	5	5	1	1	3	3	3	2	3	2	3	3	3	3	3	2	2	3	3	3	3	2	2	3	1	1	1
402	46	1	2	2	3	1	2	2	1	5	5	3	5	4	5	4	3	3	1	3	5	2	4	5	1	1	3	2	3	2	5	2	2	3	5	4	4	1	2	2	3	2	2	3	2	3	1	1	3
403	32	1	2	2	3	1	2	2	1	4	4	4	4	4	1	1	1	1	1	2	1	1	4	4	3	3	4	1	4	2	4	4	2	4	4	2	3	2	3	4	3	3	1	1	1	1	0	0	0
404	29	1	3	2	3	1	2	2	1	5	5	5	5	5	2	3	2	2	1	3	3	3	2	4	2	1	5	3	5	1	5	3	2	1	5	1	5	3	4	5	5	5	2	3	4	4	1	0	1
405	49	1	2	2	4	1	2	2	1	4	4	4	4	4	4	3	3	4	2	4	5	5	3	4	4	4	3	2	2	2	4	3	3	3	4	2	4	2	3	4	3	3	2	4	2	3	1	1	1
406	45	1	2	2	3	1	2	2	1	4	4	4	4	5	4	4	4	4	4	4	2	2	4	4	2	2	5	1	5	1	5	1	1	5	5	1	5	1	1	5	5	1	1	5	5	5	0	0	0
407	36	1	2	2	3	1	2	1	1	4	4	4	4	4	4	4	4	4	1	3	4	2	2	4	1	3	3	3	3	3	3	3	3	3	3	3	3	3	3	3	3	3	3	3	3	3	1	1	1
408	34	2	3	3	3	1	2	2	1	3	3	3	3	3	3	3	3	3	4	3	3	4	4	4	3	4	3	4	5	1	4	1	1	5	5	2	4	1	4	4	4	2	4	4	3	2	2	2	1
409	30	1	3	1	3	1	2	1	1	3	3	3	3	3	3	2	2	3	1	3	2	1	2	4	1	1	3	2	3	3	4	3	3	3	3	3	3	3	3	3	4	2	2	4	4	2	1	2	1
410	28	1	2	1	4	1	2	2	1	5	5	5	4	3	4	3	3	4	4	4	4	4	4	4	4	4	1	1	1	1	1	1	1	1	1	1	1	1	1	1	1	1	1	1	1	1	0	0	0
411	19	2	1	1	2	1	2	3	1	5	5	5	5	5	1	1	1	1	1	5	1	1	4	1	2	3	4	2	4	1	4	1	2	2	4	2	4	2	2	4	4	1	1	4	1	3	0	0	1
412	46	2	2	2	3	1	2	3	1	3	3	3	3	3	3	3	3	3	3	3	3	3	3	3	1	3	3	1	1	1	4	1	1	1	1	1	1	1	1	1	4	1	1	1	1	1	0	0	0
413	43	1	2	2	3	1	2	2	1	3	4	4	4	5	3	2	2	3	2	4	4	3	3	3	2	2	4	4	4	2	3	2	3	2	2	2	3	2	3	2	4	4	4	4	2	4	1	1	1
414	43	2	2	2	3	1	2	2	1	3	4	4	4	4	3	4	2	4	4	4	4	4	3	4	4	4	4	4	4	2	3	2	3	3	2	2	3	2	3	2	4	4	4	4	2	4	1	1	0
415	52	1	2	2	3	1	2	2	1	5	5	5	5	5	4	4	3	2	1	4	2	2	2	4	3	2	5	5	5	1	5	1	3	4	4	1	5	5	3	2	4	2	4	3	2	4	1	0	0
416	48	2	2	2	3	1	2	2	1	2	4	3	4	5	2	2	2	3	1	2	2	3	3	4	2	2	4	2	3	1	4	3	2	4	4	2	4	2	2	3	4	2	2	4	1	4	1	1	1
417	36	1	2	2	3	1	2	3	1	4	4	4	5	5	3	4	2	3	1	3	2	2	2	4	3	1	5	2	2	1	5	2	2	2	4	1	3	3	2	4	4	2	2	4	4	3	0	1	1
418	22	2	2	1	3	1	2	2	1	4	4	4	4	4	2	2	2	2	1	2	2	2	2	2	2	2	2	2	3	3	3	2	3	3	3	3	2	3	4	3	3	2	3	2	3	3	1	3	3
419	31	1	2	3	3	1	2	1	1	5	5	4	4	5	2	2	2	2	1	4	2	2	3	3	1	1	4	1	1	1	4	2	1	4	4	2	2	2	2	3	4	2	2	3	2	3	0	0	1
420	31	1	2	2	3	1	2	2	1	2	3	2	4	4	2	2	2	3	2	2	2	2	3	3	2	2	4	1	2	2	2	2	2	2	2	2	3	2	2	2	2	2	2	2	2	5	1	1	1
421	45	1	2	2	3	1	2	3	1	4	3	4	3	4	2	4	4	4	5	3	4	2	4	4	4	4	1	1	2	1	3	1	4	3	4	4	1	1	1	1	1	1	1	1	1	1	0	0	0
422	47	1	2	2	3	1	2	2	1	3	3	3	3	3	3	3	3	3	3	3	3	3	3	3	1	3	4	1	4	1	3	2	2	2	2	2	2	2	2	2	2	2	2	2	2	2	1	1	1
423	35	1	2	2	3	1	2	2	1	5	5	5	5	5	2	2	2	3	3	3	3	3	3	3	1	3	1	1	1	1	1	1	1	1	1	1	1	1	1	1	1	1	1	1	1	1	0	0	0
424	25	2	2	2	3	1	2	2	1	4	4	4	4	4	2	4	4	4	2	2	3	3	4	4	1	1	4	2	3	2	4	2	2	2	3	3	3	2	3	4	4	3	2	2	4	4	0	0	1
425	23	1	2	2	3	1	2	2	1	4	3	3	3	3	2	2	3	3	1	4	4	4	4	4	2	2	2	2	1	2	4	4	4	4	4	4	4	2	4	3	3	3	3	3	4	4	1	1	2
426	22	1	2	1	3	1	2	2	1	5	4	4	4	4	4	4	3	2	1	1	2	3	3	1	2	3	3	1	3	2	4	2	2	4	4	2	4	1	2	4	4	2	2	3	2	4	0	1	1
427	54	2	2	2	3	1	2	3	1	4	4	4	4	4	4	4	4	1	1	1	1	1	4	4	1	3	3	3	3	3	3	3	3	3	3	3	3	3	3	3	3	3	3	3	3	3	1	1	1
428	40	2	2	2	3	1	2	2	1	4	3	3	4	4	2	2	2	2	1	3	4	2	2	4	2	2	4	2	4	1	5	1	2	3	4	2	4	2	2	4	4	2	2	4	2	4	0	0	0
429	46	2	1	2	3	1	2	3	1	4	3	3	4	4	2	2	3	3	1	3	4	4	4	4	2	2	2	3	1	2	4	4	4	4	4	4	4	2	2	4	4	4	4	4	4	4	1	1	2
430	39	1	2	2	3	1	2	2	1	3	3	3	3	4	3	3	3	3	3	3	3	3	3	3	2	2	1	4	2	2	4	4	4	2	2	4	4	2	4	4	4	4	4	4	4	4	0	1	1
431	31	1	2	2	3	1	2	3	1	4	4	4	4	4	3	2	2	2	1	4	4	3	3	4	2	2	2	3	2	2	2	4	4	2	2	3	3	4	3	2	3	2	4	2	4	2	2	1	1
432	46	2	2	2	3	1	2	2	1	3	3	3	4	3	3	3	3	3	3	3	3	3	3	3	1	3	1	2	1	1	1	1	1	1	1	1	1	2	1	3	3	3	3	3	3	3	1	1	1
433	40	1	3	2	4	1	2	2	1	4	2	3	2	1	2	2	2	3	4	3	3	3	3	3	2	2	3	2	2	2	4	3	2	3	2	3	3	2	2	3	3	2	3	3	2	4	2	1	1
434	39	2	2	2	3	1	2	2	1	3	3	3	3	3	3	3	3	3	3	3	3	3	3	3	1	3	4	2	4	1	5	1	1	1	4	4	4	4	4	4	4	1	4	4	4	4	1	1	1
435	35	1	3	3	3	1	2	2	1	4	4	4	4	4	2	2	2	4	1	3	3	3	3	3	2	1	3	2	1	2	3	1	1	3	4	2	2	2	2	4	4	2	2	4	2	4	1	1	1
436	46	1	2	2	3	1	2	2	1	3	3	3	3	2	2	3	3	3	1	3	3	3	3	3	2	2	3	2	2	2	3	2	2	2	2	2	3	2	2	3	3	3	2	3	2	3	1	1	1
437	32	1	2	2	3	1	2	2	1	3	3	3	3	3	2	2	2	2	2	2	2	2	2	4	2	2	3	1	3	1	2	2	3	2	2	2	2	2	2	3	2	2	2	2	2	2	1	1	1
438	40	1	2	2	3	1	2	2	1	4	4	4	4	4	4	2	4	4	1	1	2	3	4	2	2	2	3	1	3	2	4	2	2	4	4	2	4	2	2	4	4	2	2	4	2	3	1	1	1
439	50	1	3	2	4	2	2	1	1	3	4	3	4	4	3	3	4	2	2	3	2	2	3	3	3	4	2	2	1	1	1	2	2	2	1	2	1	2	1	1	2	2	2	2	2	2	1	0	0
440	30	1	2	2	3	1	2	3	1	4	4	3	4	3	3	4	4	2	4	4	4	2	2	4	3	2	4	3	4	4	3	4	4	3	4	3	3	4	4	4	3	3	4	4	4	4	2	2	1
441	43	1	2	2	3	1	2	3	1	4	4	4	4	4	4	4	4	4	4	4	3	3	3	3	2	1	4	2	3	5	3	3	2	3	3	2	3	3	3	3	3	3	3	2	2	2	1	1	1
442	30	1	2	2	3	1	2	3	1	4	4	4	4	4	2	2	2	3	1	2	2	2	3	3	2	2	3	2	3	1	3	2	2	3	4	2	3	2	2	3	3	2	2	3	2	3	1	1	1
443	22	1	2	2	3	2	2	3	1	4	4	4	4	4	4	3	2	3	3	3	4	3	3	4	2	2	4	3	2	2	4	3	2	4	4	4	4	2	1	2	4	2	2	4	2	4	1	1	1
444	52	1	2	2	3	1	2	3	1	3	3	3	3	4	2	4	4	4	4	3	4	2	2	4	2	1	2	2	2	2	3	3	2	2	2	3	2	3	2	3	2	2	2	3	2	3	1	1	1
445	46	2	2	2	3	1	2	1	1	5	3	4	4	4	4	4	4	2	3	2	3	4	4	4	3	5	1	1	3	3	2	3	3	3	3	3	2	2	2	3	3	2	3	3	4	2	1	2	2
446	49	2	2	2	3	1	2	3	1	4	4	4	3	4	2	2	2	3	1	2	2	2	3	3	2	2	3	5	3	1	3	3	3	3	3	3	3	1	3	3	3	3	3	3	3	4	1	1	1
447	46	2	3	2	3	1	2	3	1	4	4	4	4	4	4	4	4	4	4	4	4	4	4	4	4	4	4	4	2	1	1	1	1	1	1	1	1	1	1	3	3	3	1	3	1	3	0	0	0
448	49	1	2	2	3	1	2	3	1	4	4	2	4	4	2	3	4	2	1	3	3	3	3	3	1	1	3	2	3	2	3	2	2	3	3	2	3	2	2	3	3	3	3	3	2	3	2	1	1
449	52	2	1	2	2	1	2	3	1	4	4	4	4	4	2	2	2	2	1	2	2	2	4	3	3	2	3	2	3	2	4	4	4	4	4	2	4	2	2	4	4	2	2	4	2	4	0	1	0
450	43	2	2	2	3	1	2	2	1	2	4	3	3	4	2	3	3	3	2	3	3	3	4	3	3	2	2	2	2	2	2	3	3	2	3	3	3	2	3	3	3	2	3	3	3	2	1	1	1
451	43	1	1	2	2	2	2	1	1	4	4	4	4	4	2	2	3	2	1	2	2	2	3	4	2	2	3	2	3	1	4	2	2	4	4	2	3	4	3	4	4	2	2	4	3	4	1	1	0
452	45	1	2	2	3	1	2	3	1	3	3	3	3	3	3	3	3	3	3	3	3	3	3	3	1	3	3	3	3	3	3	3	3	3	3	3	3	3	3	3	3	3	3	3	3	3	2	2	2
453	33	1	2	3	3	1	2	3	1	3	4	4	3	4	1	2	2	2	1	3	2	2	3	4	2	1	3	1	2	1	5	2	3	3	4	1	3	2	2	4	4	2	2	4	2	4	0	1	1
454	38	2	3	2	3	1	2	3	1	3	4	3	3	3	3	3	2	3	2	3	3	2	3	3	2	2	3	2	3	2	4	2	3	3	3	2	3	2	2	4	4	2	2	4	3	4	2	1	0
455	49	1	2	2	3	1	2	3	1	5	5	5	5	5	1	2	2	2	1	1	1	1	2	4	2	2	4	1	4	1	4	2	2	1	4	2	4	2	2	4	4	2	2	4	2	4	0	0	1
456	48	1	3	2	3	1	2	3	1	4	4	4	4	4	4	4	4	4	4	4	4	4	3	3	2	2	4	2	4	4	4	2	2	2	2	2	3	3	2	2	2	2	2	2	3	3	1	1	1
457	19	1	1	1	2	1	2	3	1	4	4	4	4	4	2	2	2	2	1	3	3	3	3	5	3	2	3	3	2	2	3	2	2	3	3	2	3	2	2	2	3	3	3	3	3	3	1	1	0
458	33	1	2	2	3	1	2	3	1	3	3	3	3	3	3	3	3	3	3	3	3	3	3	3	1	3	3	3	2	2	3	3	2	2	3	3	3	2	4	2	3	3	2	3	3	2	1	2	1
459	36	1	2	2	3	2	2	1	1	3	4	4	4	4	4	1	4	3	4	1	1	1	4	4	3	4	4	4	4	4	4	4	4	4	4	4	4	4	4	4	4	4	4	4	4	4	0	0	1
460	41	1	2	2	3	1	2	2	1	4	4	4	4	4	2	4	4	2	1	4	2	3	3	3	1	1	4	3	3	4	4	3	2	2	2	4	3	2	3	2	4	3	3	3	2	4	2	1	2
461	23	2	3	1	3	1	2	2	1	3	3	2	3	3	2	3	3	2	1	4	4	4	3	4	1	1	2	3	2	2	2	3	4	4	3	2	3	2	2	2	3	2	4	4	4	4	1	1	2
462	31	1	2	2	3	1	2	2	1	3	4	4	4	4	2	2	4	2	1	4	2	3	3	3	1	1	4	3	3	4	4	3	2	2	2	4	3	3	4	2	4	3	3	3	2	4	2	1	2
463	24	2	2	1	2	1	2	1	1	5	4	3	4	4	3	2	4	4	1	2	2	2	2	2	2	2	2	2	2	2	4	2	2	2	4	2	4	2	2	4	4	2	2	2	4	2	0	0	1
464	50	1	2	2	3	1	2	2	1	4	4	4	4	4	2	2	4	2	1	2	2	2	3	3	2	2	2	2	3	2	4	3	2	2	4	4	4	2	2	4	4	2	2	4	3	4	1	1	1
465	47	1	2	2	3	1	2	2	1	4	4	4	4	4	4	2	2	2	1	2	2	2	2	2	2	2	4	2	2	2	4	4	4	2	4	4	4	2	2	4	4	2	2	2	2	4	0	0	0
466	51	1	2	2	4	1	2	2	1	4	4	4	4	4	2	2	2	3	1	3	3	3	2	4	2	2	3	3	3	3	3	3	3	3	3	2	2	2	3	3	3	3	3	3	1	3	1	1	1
467	27	1	3	1	3	1	2	1	1	5	5	5	5	5	2	2	2	4	1	4	5	5	5	5	3	5	5	1	2	1	5	1	1	2	5	1	4	1	1	4	4	2	2	4	2	4	1	1	0
468	44	1	2	2	3	1	2	2	1	4	5	3	4	4	2	2	2	2	1	3	2	3	2	4	2	2	4	2	3	2	4	3	2	2	2	3	3	2	3	3	3	2	3	2	2	3	2	1	2
469	32	1	2	2	3	1	2	2	1	4	4	4	4	4	4	1	5	2	1	5	5	5	5	5	1	1	3	2	3	2	3	3	4	3	2	2	4	4	4	3	2	4	4	4	5	3	0	1	0
470	50	1	2	2	3	1	2	2	1	4	4	4	4	4	1	1	1	1	1	1	4	1	4	3	1	1	3	2	3	2	4	1	1	1	3	2	3	1	2	3	3	2	1	2	1	3	1	1	0
471	48	1	2	2	3	1	2	2	1	4	4	4	4	4	3	2	2	2	2	2	2	2	2	2	3	1	3	5	3	2	5	3	2	2	4	2	4	2	2	3	3	2	2	4	2	3	1	1	1
472	42	1	2	2	1	1	2	2	1	3	4	4	5	4	3	3	4	4	3	3	3	2	3	3	2	2	4	2	3	1	3	1	2	3	2	2	1	2	2	3	4	2	1	4	2	4	0	1	0
473	45	2	3	2	3	1	2	1	1	3	3	3	3	3	3	3	3	2	2	2	2	4	4	4	2	1	2	3	1	2	3	3	4	4	2	4	2	2	3	2	2	2	2	3	4	4	1	1	1
474	48	1	3	2	3	1	2	1	1	4	4	4	4	4	4	3	3	3	3	3	4	4	4	4	2	2	3	4	4	3	3	3	3	3	3	3	3	3	4	3	3	3	4	4	4	4	0	1	1
475	26	1	2	2	3	1	2	1	1	4	4	4	4	4	2	3	3	3	1	2	3	3	3	3	2	2	3	3	4	3	4	3	3	3	3	1	3	1	1	1	1	2	3	3	3	3	1	1	1
476	39	1	3	3	3	1	2	2	1	3	3	3	3	3	3	3	3	3	3	3	3	3	3	3	1	3	3	3	3	3	3	3	3	3	3	3	3	3	3	3	3	3	3	3	3	3	1	1	2
477	47	1	2	3	4	1	2	1	1	4	4	4	4	4	2	2	2	2	1	2	2	2	2	4	2	1	3	2	3	1	5	2	2	2	3	2	1	1	2	1	2	2	2	1	2	4	0	1	1
478	24	1	2	1	3	1	2	2	1	4	4	3	4	4	2	2	2	2	1	2	2	2	2	4	2	2	3	2	3	2	3	2	2	1	2	2	3	2	2	3	3	1	2	3	2	3	0	1	1
479	39	1	3	2	2	1	2	2	1	4	4	4	4	4	4	4	4	4	4	4	4	4	4	4	4	4	1	2	2	2	2	1	2	2	2	2	1	2	2	2	2	2	2	2	2	2	2	1	1
480	27	1	2	2	2	2	2	1	1	4	4	4	4	4	4	2	3	2	1	2	2	2	3	4	2	2	3	2	2	2	4	4	2	3	3	2	2	3	2	4	3	2	2	3	2	3	0	1	0
481	38	2	1	2	2	2	2	1	1	2	3	4	3	3	4	2	1	4	1	2	2	2	4	4	2	2	1	2	2	1	4	2	2	2	4	2	4	2	2	4	4	2	2	4	2	4	1	0	0
482	52	1	2	2	2	2	2	1	1	4	5	4	4	4	3	2	2	3	2	2	2	2	3	3	2	1	4	2	3	1	4	4	2	4	4	2	4	2	2	2	3	2	2	1	2	4	1	0	1
483	32	2	1	2	2	1	2	1	1	3	3	3	3	3	3	1	2	3	3	3	3	3	3	3	1	1	4	1	3	1	5	1	1	3	3	2	3	2	2	3	3	2	2	3	2	3	1	2	2
484	24	1	2	2	2	2	2	1	1	4	4	4	4	4	4	4	3	3	3	4	4	1	4	3	1	1	5	1	5	1	5	1	1	1	5	1	5	1	1	5	5	1	1	5	5	5	2	2	2
485	39	2	2	2	2	1	2	1	1	3	3	3	3	2	4	3	3	3	2	2	2	3	3	3	2	2	3	2	2	2	3	3	3	4	3	4	3	2	2	3	4	2	5	5	5	5	2	3	3
486	42	1	2	2	2	2	2	1	1	5	5	5	5	5	1	1	1	2	1	2	4	2	2	2	2	2	4	2	2	2	4	2	2	2	4	2	3	1	2	3	4	2	2	3	2	3	0	0	0
487	30	1	2	1	3	1	2	2	1	1	1	1	1	1	1	1	4	1	1	1	1	3	4	1	1	1	1	1	1	1	1	2	1	2	1	1	1	1	1	1	2	2	1	1	1	2	0	0	0
488	47	2	2	1	2	2	2	1	1	5	5	5	5	5	3	3	3	3	1	2	3	3	3	2	2	2	3	3	3	2	4	2	3	3	3	3	3	2	2	3	5	2	3	3	3	3	0	1	1
489	40	2	2	2	2	2	2	1	1	4	4	4	3	5	4	2	4	2	2	4	3	3	2	2	2	2	4	1	1	1	4	1	1	1	4	1	1	1	1	1	1	1	1	4	1	1	0	0	0
490	34	1	2	2	2	1	2	1	1	1	4	3	4	3	4	5	3	2	3	3	3	2	3	5	3	2	3	5	4	3	3	3	3	3	3	5	5	4	5	5	5	4	5	4	3	3	2	2	3
491	41	1	2	2	2	2	2	1	1	3	4	4	4	4	4	2	3	4	2	4	2	3	4	4	2	2	3	2	2	1	3	2	2	4	4	2	4	2	2	3	3	3	2	4	2	4	1	1	0
492	28	2	2	2	2	1	2	1	1	5	5	5	5	5	1	1	1	1	1	1	1	1	4	1	3	5	5	1	5	1	5	1	1	5	5	1	5	1	1	5	5	1	1	3	1	5	0	0	0
493	26	1	2	1	2	2	2	1	1	4	4	2	4	4	2	2	2	2	1	3	2	3	4	3	2	2	4	2	4	2	4	4	3	3	3	3	3	2	3	3	3	3	3	3	3	3	0	1	1
494	40	1	2	2	3	1	2	2	1	4	4	4	4	4	4	2	2	2	1	1	2	3	2	4	1	1	4	4	2	2	4	2	2	2	2	1	4	2	2	1	4	2	2	1	2	4	1	1	1
495	40	1	1	2	3	1	2	3	1	4	4	4	4	4	1	1	1	2	1	2	2	2	2	2	1	1	3	2	3	2	4	4	3	4	4	2	3	4	4	4	4	1	4	4	3	3	0	0	0
496	40	1	1	2	3	1	2	3	1	3	5	4	4	4	3	2	2	2	2	2	2	4	4	4	2	1	2	3	1	2	3	3	4	4	2	4	2	2	3	2	2	2	2	3	4	3	1	1	1
497	46	2	1	2	2	1	2	3	1	1	1	1	1	1	3	3	4	2	1	3	3	3	5	2	2	2	3	1	3	1	3	2	1	3	3	1	3	1	3	4	3	1	1	3	2	3	1	1	0
498	53	1	1	2	2	1	2	3	1	3	3	3	3	4	2	3	2	2	1	2	2	2	3	3	2	2	3	2	2	2	4	2	2	2	3	3	3	2	2	2	3	2	2	2	3	3	1	1	0
499	33	1	2	2	3	1	2	3	1	5	5	3	5	4	4	5	4	5	1	4	5	3	4	4	3	4	5	1	1	1	1	1	1	1	1	1	1	1	1	1	1	1	1	1	1	1	0	1	0
500	49	1	1	2	3	1	2	3	1	4	4	4	4	4	4	3	4	2	2	3	3	2	3	3	3	1	3	2	3	2	4	2	2	4	4	4	2	2	2	3	3	2	2	3	2	3	1	1	1
501	51	1	2	1	2	1	2	2	1	2	4	4	2	4	2	2	2	2	1	2	2	2	2	2	2	2	4	1	4	2	4	4	2	1	4	2	2	2	1	1	1	1	1	2	1	1	0	0	0
502	48	1	2	2	2	2	2	2	1	1	4	3	2	3	3	3	3	3	3	3	3	2	3	3	2	2	4	2	4	2	4	3	3	4	3	2	2	2	2	3	4	2	3	2	3	2	2	1	1
503	43	2	2	1	2	1	1	2	1	4	4	4	4	4	3	3	3	3	3	3	3	5	5	1	1	1	2	2	2	2	2	2	2	2	2	4	4	2	2	2	2	2	2	2	2	2	0	1	1
504	51	1	1	2	2	1	2	2	1	4	5	5	4	5	2	2	2	2	1	2	3	4	4	3	2	2	3	1	5	1	5	1	1	5	5	1	5	1	5	5	5	1	1	5	1	1	0	0	0
505	47	1	2	2	3	1	2	2	1	3	3	3	3	3	2	2	2	3	2	3	3	3	3	3	2	2	2	2	2	2	3	3	3	2	3	3	3	2	2	2	3	3	2	2	5	4	1	1	3
506	46	1	1	2	2	1	2	3	1	4	5	5	5	4	2	2	2	4	1	5	2	2	4	4	2	2	3	1	1	2	5	4	3	4	4	3	4	2	4	4	5	2	2	2	3	4	1	1	1
507	48	1	2	2	3	1	2	2	1	1	4	2	4	4	4	4	4	2	1	3	4	4	4	4	2	2	3	2	2	2	4	4	5	4	4	4	4	5	5	5	5	4	4	4	4	4	1	1	0
508	34	1	2	2	3	1	2	2	1	4	3	4	3	3	2	4	3	2	1	3	3	3	3	4	3	2	3	2	2	4	3	3	3	4	2	4	2	3	4	3	2	2	3	3	4	2	1	1	2
509	39	1	2	2	3	1	2	3	1	4	4	4	4	3	1	1	2	2	1	2	3	3	3	3	2	2	3	3	3	3	3	3	3	3	3	3	3	3	3	3	3	3	3	3	3	3	1	1	1
510	32	1	2	2	3	1	2	3	1	3	3	3	3	2	2	3	3	2	1	3	5	3	3	5	1	1	2	1	3	1	2	1	2	2	1	2	2	2	2	1	3	3	2	4	4	2	3	3	0
511	40	1	2	2	3	1	2	2	1	4	4	3	4	4	2	2	2	2	1	4	2	3	3	2	2	2	3	2	3	2	3	4	4	2	4	4	2	2	3	2	4	3	3	2	4	4	1	1	1
512	34	2	3	2	3	2	1	2	1	4	4	3	4	3	1	3	4	1	3	3	4	4	3	3	1	4	1	1	1	1	1	1	1	1	1	1	3	1	1	1	3	1	1	1	3	1	0	0	0
513	37	2	2	2	2	1	2	2	1	3	3	3	3	3	4	3	3	3	3	3	3	4	3	1	1	1	3	3	3	1	3	1	1	1	1	1	1	1	1	1	1	1	1	1	1	1	0	0	0
514	27	1	2	1	2	1	2	2	1	4	4	4	4	4	4	2	4	4	1	4	4	2	2	4	2	2	3	3	3	3	4	4	3	3	3	3	3	3	3	3	3	3	4	4	4	4	1	1	1
515	41	1	1	2	3	1	2	2	1	5	5	5	5	5	5	5	1	5	5	5	5	1	5	5	3	5	3	3	3	3	1	1	1	1	1	4	4	4	4	3	4	2	3	4	2	4	0	0	0
516	51	1	1	2	3	1	2	3	1	4	4	4	4	4	1	1	1	1	1	1	3	1	4	3	1	1	4	1	4	2	4	1	1	1	1	1	4	1	1	1	4	1	1	4	3	4	1	1	0
517	33	1	2	2	3	1	2	2	1	1	4	3	4	3	2	1	1	1	1	1	1	1	4	1	1	1	1	1	1	1	1	1	1	1	1	1	2	1	1	1	1	1	1	1	1	1	0	0	0
518	31	1	2	2	3	1	2	2	1	3	3	3	3	3	2	2	2	2	2	3	4	2	2	4	2	2	3	2	3	2	3	3	2	2	3	2	3	3	2	2	3	2	2	2	2	3	0	0	0
519	29	1	2	1	3	1	2	2	1	4	4	4	4	4	3	3	3	3	3	3	3	3	3	3	1	3	3	3	3	3	3	3	3	3	3	3	3	3	3	3	3	3	3	3	3	3	2	2	2
520	48	1	2	2	3	1	2	2	1	3	3	3	3	4	4	3	3	3	1	3	4	4	4	4	1	1	3	2	3	2	3	2	2	1	3	3	2	3	1	3	3	2	2	2	2	3	1	0	1
521	42	1	2	2	3	1	2	2	1	5	5	5	5	3	3	3	1	1	1	4	1	3	4	2	3	1	5	1	5	1	5	1	1	1	5	1	5	1	1	5	5	1	1	5	1	5	0	0	0
522	22	1	1	1	3	1	2	2	1	5	5	5	5	5	4	5	4	4	4	4	3	3	3	4	3	2	4	4	2	2	3	3	2	2	3	2	3	2	2	3	3	2	2	2	2	2	1	1	1
523	24	1	2	1	3	1	2	3	1	4	4	4	4	4	4	2	2	4	1	3	3	2	2	4	1	4	4	4	4	4	4	4	3	3	3	3	4	1	2	2	3	3	3	3	3	3	0	0	0
524	41	1	2	2	3	1	2	2	1	4	4	4	4	4	4	2	2	4	1	2	2	2	2	2	2	2	4	2	4	2	4	2	2	2	4	4	4	2	2	2	4	2	2	4	2	3	0	0	0
525	23	1	2	1	2	1	2	2	1	3	4	3	3	3	3	3	3	3	1	2	2	2	2	4	2	1	1	2	3	2	4	2	2	2	4	2	1	2	2	3	4	2	2	2	2	2	1	1	0
526	44	1	2	2	3	1	2	2	1	3	4	3	4	4	2	2	2	2	1	2	2	2	3	3	2	1	4	1	3	1	3	3	3	3	3	3	3	1	3	3	3	3	2	3	3	3	1	1	1
527	26	1	2	1	3	1	2	2	1	4	5	4	4	4	3	2	2	4	1	3	3	3	2	4	2	1	1	1	1	1	1	1	1	1	1	1	1	1	1	1	1	1	1	1	1	1	0	0	0
528	34	1	2	2	3	1	2	2	1	5	5	5	5	5	2	2	2	2	1	1	1	1	5	2	3	5	4	1	1	1	2	2	2	2	4	1	4	1	1	4	5	1	1	1	1	4	0	0	0
529	42	1	2	2	3	1	2	2	1	4	4	4	4	4	4	2	2	2	1	2	2	2	2	2	2	2	4	2	2	2	2	4	2	2	2	2	3	2	2	2	4	2	2	2	2	2	0	1	1
530	28	1	2	1	3	1	2	2	1	5	5	4	4	4	2	2	2	3	1	3	2	1	2	2	2	2	4	2	4	1	4	2	2	4	4	4	4	2	1	3	3	1	1	3	2	4	1	0	1
531	52	2	1	2	2	1	2	2	1	3	3	3	3	3	4	3	3	3	3	3	3	3	3	3	1	3	1	1	1	1	1	1	1	1	1	1	1	1	1	1	1	1	1	1	1	1	2	2	1
532	40	1	3	2	4	2	2	2	1	4	5	5	5	5	1	2	1	2	1	4	4	2	2	4	2	2	3	2	2	1	3	3	3	2	2	3	4	2	2	3	4	3	2	3	3	3	0	0	0
533	25	1	2	2	2	2	2	1	1	3	3	3	3	3	2	3	3	4	1	2	3	3	3	3	3	3	4	3	3	3	3	3	3	3	3	2	2	2	3	3	3	3	2	3	3	3	1	1	1
534	29	1	3	1	3	2	2	2	1	4	4	4	4	4	3	3	3	3	1	3	3	3	3	3	2	2	3	2	3	2	4	3	2	2	3	2	3	2	2	3	3	2	2	3	2	3	1	1	1
535	56	1	1	2	3	1	2	3	1	4	5	5	4	4	1	2	1	2	2	3	5	3	2	4	1	1	3	3	3	3	3	3	4	3	3	4	3	3	3	3	3	2	3	3	2	3	1	1	1
536	36	1	2	2	3	1	2	2	1	4	4	4	4	4	4	2	2	4	3	3	4	3	3	3	2	2	3	3	3	3	4	3	3	4	4	1	4	1	3	3	3	3	1	3	3	3	1	1	1
537	32	2	3	2	3	2	2	2	1	3	3	3	3	3	4	3	3	3	3	3	3	3	3	3	1	3	3	3	3	3	3	3	3	3	3	3	3	3	3	3	3	3	3	3	3	3	1	1	1
538	50	1	2	2	3	1	2	2	1	4	4	3	4	4	2	3	3	2	1	3	4	4	4	4	2	2	3	3	3	3	3	3	3	3	3	3	3	3	3	3	3	3	3	3	3	3	1	1	1
539	31	1	3	1	3	1	2	2	1	4	4	3	3	4	2	3	2	2	2	3	2	2	3	3	2	2	2	2	2	2	3	2	2	2	2	3	3	2	2	3	3	3	3	3	3	3	0	1	1
540	48	2	2	2	3	1	2	2	1	3	3	3	3	3	4	3	4	4	4	4	4	4	4	4	4	4	4	2	3	2	3	2	2	3	3	2	3	2	2	3	3	2	2	3	3	3	1	1	0
541	36	1	2	2	3	1	2	3	1	4	4	4	4	4	4	2	2	4	2	4	5	2	2	4	2	2	4	1	4	1	4	2	2	4	4	4	4	2	2	4	4	4	4	4	4	4	0	0	0
542	25	1	2	2	3	1	2	3	1	4	4	4	4	4	4	2	2	4	2	4	2	2	2	4	2	2	4	4	4	2	4	2	2	4	4	4	4	2	2	4	4	4	4	4	4	4	0	0	0
543	35	2	2	2	3	1	2	3	1	4	5	4	4	4	1	3	4	2	1	3	3	3	4	4	1	1	2	2	4	2	3	4	3	2	3	3	3	3	4	2	4	4	3	2	3	3	0	1	1
544	28	1	2	1	3	1	2	3	1	4	4	4	4	4	4	2	2	2	2	2	2	2	2	2	2	2	4	2	2	2	4	4	2	4	4	2	3	2	4	2	4	4	2	4	2	4	1	1	1
545	28	1	2	2	3	1	2	2	1	4	4	3	3	4	4	4	3	2	1	3	2	2	2	4	2	2	3	3	3	3	3	3	3	3	3	3	3	3	3	3	3	3	3	3	3	3	1	1	1
546	41	2	2	2	3	1	2	2	1	5	5	5	5	3	4	5	3	3	4	2	4	3	4	3	3	3	1	1	1	1	1	3	2	4	2	4	2	4	2	3	2	4	3	2	3	4	1	2	1
547	47	2	2	2	3	1	2	2	1	4	4	4	4	3	4	3	3	3	3	4	4	3	3	3	1	2	3	3	2	3	3	3	3	3	3	3	3	3	3	3	3	3	3	3	3	3	1	1	1
548	40	1	2	2	4	1	2	2	1	4	4	3	4	3	2	2	2	2	1	4	4	3	3	4	2	2	3	2	2	1	3	4	3	4	3	3	4	2	2	3	4	3	2	3	3	3	1	1	1
549	56	1	2	2	3	1	2	3	1	5	5	2	5	4	2	1	1	4	1	4	2	1	4	5	3	2	5	4	4	1	5	3	1	3	3	1	4	1	3	3	3	3	1	1	2	5	1	1	1
550	29	1	3	1	3	1	2	2	1	4	4	4	4	4	2	4	2	4	1	2	2	2	2	4	1	2	4	1	3	1	4	2	1	2	4	2	4	2	2	2	3	2	2	2	2	4	0	1	1
551	32	1	3	2	4	2	2	2	1	4	4	4	4	4	3	3	3	3	1	3	3	3	3	4	2	3	3	2	3	2	4	3	2	3	3	2	2	2	2	2	3	2	3	3	2	3	1	1	1
552	40	2	2	2	3	1	2	3	1	4	4	4	4	4	2	2	2	2	1	2	3	3	3	4	1	1	3	2	3	2	3	2	3	3	3	3	3	2	4	4	3	3	3	3	3	3	1	1	1
553	49	1	2	2	3	1	2	3	1	3	3	3	3	3	4	3	3	3	3	3	3	3	3	3	1	3	3	3	3	3	3	3	3	3	3	3	3	3	3	3	3	3	3	3	3	3	1	1	1
554	48	1	2	2	3	1	2	3	1	4	3	2	3	4	2	2	2	2	1	2	2	2	3	4	2	2	4	4	4	2	4	3	2	4	4	2	2	2	2	3	4	2	2	2	1	3	1	1	1
555	19	2	2	1	2	1	2	3	1	5	5	5	5	5	4	4	5	5	1	5	5	5	5	5	3	5	4	2	4	1	4	1	1	1	1	1	1	2	1	4	4	1	2	1	2	1	0	0	0
556	30	1	3	2	3	1	2	2	1	4	4	4	4	4	3	3	4	3	2	3	5	3	3	4	2	2	4	2	2	2	5	3	4	4	4	4	4	1	4	4	4	4	2	3	4	5	1	1	1
557	25	1	2	1	3	1	2	2	1	4	3	3	3	3	3	3	4	3	3	3	3	3	3	2	3	1	4	2	1	2	3	3	3	3	3	3	3	3	3	3	3	3	1	1	2	2	1	1	0
558	27	1	2	1	3	1	2	2	1	2	4	4	4	4	4	4	4	4	4	4	4	4	4	4	4	4	4	4	4	4	4	4	4	4	4	4	4	4	4	4	4	4	4	4	4	4	0	0	0
559	42	1	2	2	3	1	2	2	1	3	3	3	3	4	4	3	4	3	3	3	3	3	3	3	2	2	3	2	2	3	4	2	2	2	3	3	3	2	3	2	4	4	3	3	3	3	1	1	1
560	52	1	2	2	3	1	2	2	1	4	5	4	3	5	4	1	5	2	1	4	4	3	4	1	2	2	4	2	3	2	4	3	2	2	3	2	4	2	3	4	4	2	2	3	3	2	1	1	1
561	43	1	2	2	3	1	2	2	1	2	4	2	3	3	4	2	2	2	1	3	2	3	4	4	2	2	3	2	2	2	3	2	3	3	2	2	3	2	2	4	4	4	2	2	2	2	1	1	1
562	38	2	2	2	3	1	2	2	1	3	3	3	3	3	4	3	4	3	1	2	2	2	2	4	2	2	3	2	3	2	4	3	3	3	3	3	3	2	3	2	3	2	3	2	2	3	0	1	1
563	53	1	2	2	3	1	2	2	1	3	3	3	3	3	1	1	2	2	2	3	5	2	3	3	2	1	3	3	3	2	3	3	3	3	3	3	3	2	2	3	3	3	3	3	2	3	1	1	1
564	29	1	2	2	3	1	2	4	1	2	4	4	3	4	2	4	4	2	1	4	2	2	3	4	4	3	3	2	2	3	3	3	2	4	2	2	2	2	3	2	3	2	2	3	2	2	1	1	1
565	33	1	2	2	3	1	3	4	1	3	3	3	3	4	3	3	4	3	5	3	3	3	4	3	2	2	3	2	2	3	4	2	2	3	3	2	3	2	2	3	3	3	2	4	3	4	1	1	1
566	51	1	1	3	3	1	3	4	1	3	3	3	3	3	4	3	3	3	3	1	4	3	3	3	1	2	1	4	3	3	4	4	4	4	4	3	3	3	4	3	4	2	4	2	4	4	0	1	0
567	54	1	1	2	3	1	2	2	1	2	4	4	4	4	4	3	2	4	3	4	2	2	4	2	2	2	3	3	3	3	3	3	4	2	2	2	3	4	3	3	2	3	2	2	3	2	1	1	1
568	21	2	2	1	3	1	2	4	1	3	3	3	3	3	4	3	4	3	3	3	3	3	3	3	2	1	4	2	4	3	4	3	3	4	4	4	3	4	3	3	3	2	3	3	3	2	1	1	1
569	35	1	1	2	3	1	3	4	1	3	5	3	3	3	3	3	4	3	2	2	3	3	3	2	1	2	3	2	3	2	3	4	4	4	4	2	4	2	2	2	4	2	2	4	4	4	1	1	1
570	42	1	1	2	3	1	3	4	1	2	4	4	4	4	4	4	4	4	4	4	4	4	4	4	4	4	3	4	2	2	3	3	3	3	3	2	3	3	3	3	3	3	2	2	3	3	1	1	1
571	23	1	2	1	3	1	2	4	1	2	4	4	4	4	2	2	2	4	2	4	4	3	4	4	3	3	4	2	1	2	4	3	3	2	4	2	4	2	2	4	4	2	2	2	3	4	0	0	0
572	25	1	2	1	3	1	1	4	1	5	5	5	5	3	3	3	3	3	3	3	3	3	3	3	1	3	3	3	3	3	3	3	3	3	3	3	3	3	3	3	3	3	3	3	3	3	0	0	0
573	39	1	1	2	3	1	3	4	1	2	4	4	5	4	4	3	2	3	2	3	3	3	3	3	2	2	4	2	3	2	4	2	2	3	4	2	3	2	2	3	3	2	2	3	2	3	0	1	1
574	48	1	1	2	3	1	2	3	1	2	4	4	4	4	4	4	2	2	2	3	3	3	2	4	2	2	4	2	4	2	4	2	2	2	4	2	3	2	2	4	4	2	2	2	3	4	1	0	0
575	40	1	2	2	3	2	2	4	1	1	4	4	2	4	2	4	4	2	2	4	4	2	4	4	2	2	5	2	4	2	4	2	5	1	4	4	2	4	3	4	4	2	2	4	4	2	1	1	1
576	26	1	2	1	3	1	2	4	1	2	4	4	4	4	3	3	3	2	1	4	4	3	4	4	2	2	4	3	2	2	4	5	3	3	3	2	4	3	3	3	4	2	3	4	3	4	1	1	1
577	41	2	2	2	3	1	2	4	1	3	3	3	3	3	2	2	2	2	1	4	3	5	3	1	1	1	3	2	3	2	3	3	2	2	2	2	2	4	2	4	4	2	2	4	4	2	1	1	2
578	24	1	2	1	3	1	2	4	1	4	4	4	4	4	2	2	2	2	2	2	2	2	2	2	2	2	4	2	2	2	4	2	2	2	4	2	2	2	2	4	4	2	2	4	2	4	1	1	0
579	48	1	1	2	4	1	2	4	1	5	5	5	5	5	3	2	2	2	1	5	3	2	3	4	2	1	4	2	3	2	3	3	3	2	3	2	3	2	3	2	3	2	2	2	2	3	1	1	0
580	26	1	3	1	4	1	2	4	1	4	4	4	4	4	4	4	4	4	4	4	4	2	4	4	3	4	4	4	3	4	3	2	3	4	3	4	4	3	4	2	2	2	2	4	3	4	1	2	1
581	52	1	2	2	3	1	2	2	1	3	3	3	3	3	2	2	3	2	1	3	3	4	4	5	3	3	4	1	2	1	5	2	3	4	4	2	3	1	2	3	3	2	3	3	2	5	1	1	1
582	37	2	2	2	3	1	2	4	1	4	4	4	4	4	2	2	2	2	2	4	4	3	2	4	1	2	4	1	3	1	5	1	1	3	5	1	5	1	1	5	5	1	1	5	5	5	0	1	0
583	42	2	2	2	3	1	2	2	1	4	4	4	4	4	1	4	1	4	1	1	1	1	3	1	4	4	5	1	5	1	5	1	3	5	5	5	5	1	1	5	5	1	1	5	5	5	0	0	0
584	28	1	2	2	3	1	2	4	1	4	4	4	4	4	2	2	2	4	1	4	3	3	4	3	2	1	3	3	2	1	4	2	3	2	4	2	4	2	2	4	4	2	2	2	3	4	1	1	1
585	30	1	2	2	3	1	3	3	1	3	3	3	3	3	4	1	1	1	1	1	1	1	4	1	1	1	5	1	3	2	5	1	1	2	5	2	4	2	2	3	3	2	2	2	2	4	0	1	1
586	36	1	2	2	3	1	2	4	1	3	3	4	4	3	4	2	4	2	1	4	4	4	4	4	3	3	3	2	5	1	4	4	4	2	4	2	3	1	1	4	4	4	3	4	4	3	1	2	2
587	48	1	1	2	3	1	2	3	1	4	4	4	4	4	2	2	3	3	2	3	3	4	4	3	2	3	3	3	4	3	4	3	3	3	4	3	4	3	2	3	4	3	2	4	3	4	1	1	1
588	19	1	2	1	3	1	2	2	1	3	3	4	3	3	3	3	4	3	3	3	3	4	4	3	1	4	1	1	1	2	2	1	2	2	2	2	2	2	1	1	1	1	1	1	1	1	1	1	1
589	56	1	1	2	3	1	2	3	1	5	5	3	3	3	3	2	2	2	1	2	2	2	2	4	2	1	4	2	4	2	4	1	3	3	3	2	4	2	1	4	4	2	2	2	3	5	1	1	0
590	44	1	1	2	3	1	2	3	1	4	4	4	4	4	2	2	2	2	1	4	4	1	2	4	2	2	2	2	2	1	3	2	4	2	4	4	2	2	3	2	4	3	3	2	3	2	1	1	1
591	51	2	2	2	3	1	2	3	1	3	3	3	3	3	4	3	2	2	1	3	3	3	3	3	2	1	4	3	3	2	4	3	3	3	3	2	3	2	2	3	3	2	3	3	3	3	1	1	1
592	47	2	2	2	3	1	2	2	1	3	4	4	3	4	3	3	4	4	3	4	4	4	4	4	4	4	3	3	3	3	1	3	1	2	3	1	3	2	3	3	2	3	2	1	2	2	1	1	1
593	50	2	1	2	2	1	2	2	1	4	4	4	4	4	2	4	3	2	1	5	5	2	4	3	2	2	3	2	1	3	3	5	1	3	3	3	3	5	3	4	5	3	4	4	1	2	1	1	1
594	24	2	2	2	3	1	2	2	1	3	4	4	4	3	2	3	3	3	1	3	3	3	3	3	3	3	4	2	2	2	4	2	2	2	4	4	4	2	2	3	3	3	2	3	3	3	0	1	1
595	37	1	2	2	3	1	2	2	1	1	4	2	3	4	1	1	1	2	2	2	3	1	3	4	2	1	2	1	2	1	3	4	2	2	2	2	2	1	2	2	1	1	2	1	3	4	1	0	0
596	45	1	1	2	2	1	2	3	1	4	4	4	4	4	4	4	4	4	4	4	3	3	4	4	3	4	2	2	2	2	2	2	2	2	2	2	2	2	2	2	2	2	2	2	2	2	1	1	0
597	35	1	2	2	2	1	2	3	1	4	4	4	4	4	4	4	4	4	4	4	4	4	4	4	4	4	2	2	2	2	2	2	2	2	2	2	2	2	2	2	2	2	2	2	2	2	0	0	0
598	58	1	1	2	2	1	2	3	1	5	5	5	5	5	5	2	2	2	2	2	5	2	5	5	3	5	5	1	5	1	4	2	2	4	5	1	4	2	1	4	4	2	2	2	2	4	0	0	0
599	22	1	2	1	2	1	2	3	1	4	4	4	4	4	2	3	4	2	2	3	3	3	4	4	2	2	4	2	3	2	4	2	2	4	4	2	4	2	2	4	4	2	4	2	4	4	1	1	1
600	24	2	2	1	2	1	2	3	1	3	3	3	3	3	4	3	4	3	1	3	3	3	3	3	3	3	3	2	3	2	3	3	1	2	3	3	1	1	2	3	3	2	2	1	3	3	1	1	1
601	45	2	2	2	2	1	2	2	1	4	4	4	4	4	2	2	2	2	1	2	2	2	2	2	2	2	3	2	2	2	4	2	2	2	3	2	3	3	2	3	3	2	2	3	3	3	1	1	1
602	28	1	3	2	3	1	2	3	1	3	4	3	3	4	3	3	3	3	3	3	4	1	3	3	3	2	3	3	3	3	3	3	3	3	3	3	3	3	3	3	3	3	3	3	3	3	1	3	3
603	36	2	2	2	3	1	2	3	1	4	4	4	4	4	2	3	4	2	1	2	3	3	4	5	2	2	4	1	4	1	4	4	4	3	4	3	2	1	1	3	4	2	2	4	4	4	1	1	0
604	26	1	2	1	3	1	2	2	1	4	4	4	4	4	4	4	4	4	4	3	4	1	3	4	4	4	3	3	3	3	3	3	3	3	3	3	3	3	3	3	3	3	3	3	3	3	1	1	1
605	30	1	3	2	3	1	2	3	1	4	4	4	4	4	2	3	3	2	1	2	3	3	4	5	2	1	3	2	3	2	3	2	3	3	3	2	3	2	2	3	4	2	2	3	2	3	1	1	0
606	44	2	1	2	2	1	2	3	1	5	5	5	5	5	5	5	5	5	5	5	5	5	5	5	3	5	5	5	5	1	5	1	5	5	5	5	5	5	5	5	5	5	5	5	5	5	0	0	0
607	25	1	2	1	2	1	2	3	1	5	5	5	5	5	1	3	2	2	1	4	2	2	3	3	2	3	3	2	2	1	4	3	2	3	3	2	4	2	2	3	3	2	2	4	1	3	1	1	1
608	24	1	2	1	2	1	2	2	1	4	4	4	4	5	2	3	2	4	1	4	3	2	4	4	2	2	4	4	2	1	4	4	5	2	2	4	2	4	4	4	4	4	5	2	4	5	0	1	1
609	21	1	1	1	2	1	2	3	1	3	3	3	3	4	4	3	4	3	1	2	2	2	2	2	3	1	3	2	3	2	3	2	3	3	3	3	3	2	3	2	3	3	3	2	3	2	1	1	1
610	56	1	1	2	3	1	2	3	1	4	4	4	4	4	2	2	2	2	1	3	2	2	2	4	2	4	4	1	4	1	4	1	1	1	4	1	4	1	1	4	4	1	1	4	1	1	0	0	0
611	30	2	2	2	3	1	2	2	1	4	4	4	4	3	3	3	3	2	1	3	2	2	2	4	1	3	4	4	4	4	4	4	4	4	4	4	4	4	4	4	4	4	4	4	4	4	3	1	1
612	37	2	2	2	3	1	2	2	1	5	5	1	5	4	1	1	4	4	1	3	1	3	2	4	1	1	4	1	4	1	4	1	1	1	4	4	4	1	1	3	4	1	1	1	1	1	0	0	0
613	32	1	2	2	3	1	2	2	1	4	4	4	4	4	2	2	2	2	1	2	2	2	3	3	1	1	4	2	4	2	4	3	2	4	4	4	4	4	2	4	4	2	2	4	4	2	1	1	1
614	33	1	2	2	3	1	2	2	1	3	4	3	2	4	4	2	3	4	2	3	5	4	4	3	3	5	3	5	3	4	3	5	3	5	2	5	3	5	3	5	1	3	1	4	2	5	2	3	1
615	33	2	3	2	3	2	2	2	1	5	5	4	5	4	2	2	2	2	2	2	2	2	3	4	1	1	4	4	4	4	4	4	4	4	4	4	4	4	4	4	4	4	4	4	4	4	2	1	1
616	28	1	3	2	3	1	2	2	1	5	5	5	5	5	5	5	5	5	5	5	5	1	5	5	1	2	3	2	2	2	2	2	2	2	3	2	3	2	2	3	3	3	3	2	2	3	0	0	0
617	25	1	2	1	2	1	2	2	1	2	4	4	4	4	4	4	4	2	1	4	4	4	4	4	3	4	2	4	2	2	4	4	4	4	4	4	4	4	4	4	4	4	4	4	4	4	1	1	1
618	39	1	2	2	3	1	2	3	1	4	4	4	4	4	4	4	4	4	4	4	4	4	4	4	4	4	4	4	4	4	4	4	4	4	4	4	4	4	4	4	4	4	4	4	4	4	1	1	1
619	33	1	2	2	3	1	2	2	1	4	4	4	4	4	4	4	4	4	4	3	4	3	4	3	2	2	3	3	2	1	3	3	3	3	3	3	2	2	3	3	3	3	3	3	3	3	2	2	1
620	38	1	2	2	3	1	2	3	1	4	4	4	4	4	3	2	2	1	1	3	2	2	3	3	3	2	1	1	5	1	5	1	1	1	5	1	4	1	1	4	4	1	1	5	1	5	0	0	0
621	33	1	2	2	3	1	2	2	1	4	4	4	4	4	4	4	4	4	4	3	4	4	4	4	4	4	4	4	4	4	4	4	4	4	4	4	4	4	4	4	4	4	4	4	4	4	1	1	1
622	35	2	3	2	3	2	2	2	1	3	3	3	3	3	4	3	4	3	2	3	4	3	3	3	3	3	1	1	1	1	1	1	1	1	3	1	1	1	1	1	1	1	1	1	1	1	0	1	1
623	27	1	2	1	3	1	2	3	1	3	3	3	3	3	4	3	4	3	3	3	3	3	3	3	1	3	3	3	3	3	3	3	3	3	3	3	3	3	3	3	3	3	3	3	3	3	1	1	1
624	22	2	2	1	2	1	2	3	1	4	4	4	4	4	2	3	3	3	1	3	2	3	3	4	4	4	2	3	2	3	4	4	4	4	4	2	4	2	2	4	4	3	2	3	2	3	1	1	1
625	20	1	2	1	3	1	2	3	1	4	4	4	4	4	2	2	2	2	1	2	2	2	2	2	2	2	5	2	4	5	5	2	5	2	5	2	1	2	2	5	5	2	2	4	2	5	0	0	0
626	24	2	2	1	3	1	2	3	1	4	4	4	4	4	2	2	2	2	1	2	3	3	4	3	2	2	3	2	3	2	3	2	2	2	3	2	3	2	2	3	3	2	3	3	3	2	0	1	1
627	35	1	2	2	2	1	2	3	1	1	1	1	1	1	2	1	4	2	2	4	2	2	2	4	2	4	3	2	2	2	3	3	3	2	3	2	2	1	2	3	3	2	2	3	2	3	1	1	2
628	30	1	2	1	2	1	2	3	1	3	3	3	3	3	4	3	3	3	1	3	3	3	3	3	1	1	3	1	3	4	4	4	4	4	4	4	4	2	2	4	4	4	2	4	1	4	3	3	3
629	56	1	1	2	2	1	2	3	1	4	4	4	4	3	3	3	3	2	2	4	3	3	3	2	2	2	3	2	3	2	3	3	2	3	3	2	3	2	2	3	3	2	2	3	3	3	1	1	1
630	31	1	2	2	2	1	2	3	1	5	5	5	5	5	3	2	4	3	1	5	1	1	3	1	3	1	3	2	3	2	3	3	3	3	3	3	3	2	1	4	3	2	1	3	1	3	1	1	1
631	26	2	1	1	3	1	2	2	1	3	3	3	3	4	4	4	4	4	3	3	2	3	2	4	2	2	4	4	2	4	4	5	4	4	4	4	4	4	4	4	4	5	4	5	5	4	2	2	1
632	32	1	2	2	3	1	2	3	1	5	5	5	5	5	3	2	2	5	1	2	5	2	5	2	1	1	5	1	5	1	5	5	5	5	5	1	4	5	2	4	5	4	2	4	5	4	0	0	0
633	46	1	2	2	3	2	2	2	1	2	4	3	5	5	4	2	2	1	1	1	1	4	4	2	2	2	3	2	3	1	1	1	3	3	2	4	4	2	2	3	3	1	1	4	2	2	0	0	0
634	27	1	2	1	3	2	2	2	1	1	1	3	3	1	4	2	3	3	1	3	3	3	3	2	3	1	3	3	2	3	3	3	3	3	2	5	3	3	2	3	3	3	3	3	3	3	1	1	1
635	25	1	2	1	3	1	2	3	1	2	3	4	3	3	3	4	4	4	3	4	4	4	3	4	4	4	2	2	2	2	2	2	2	2	2	2	2	2	2	2	2	2	2	2	2	2	2	2	2
636	30	2	2	2	3	2	2	2	1	4	3	4	4	3	4	4	4	3	4	3	4	4	3	4	4	3	4	2	3	2	5	4	2	3	4	2	4	2	2	4	3	2	2	2	3	2	2	1	2
637	37	1	2	2	3	1	2	3	1	3	3	2	3	3	4	3	3	2	1	2	3	3	3	3	3	3	3	2	2	2	3	2	2	2	3	2	2	3	3	2	3	2	3	3	2	3	1	1	1
638	48	1	3	2	3	2	2	3	1	4	5	4	4	3	3	3	3	4	1	4	4	4	4	5	3	3	4	1	1	1	4	1	1	1	1	1	4	1	1	4	3	1	1	3	1	1	1	1	1
639	45	1	1	2	2	1	2	3	1	4	4	4	4	4	2	4	2	2	2	3	3	2	3	3	3	1	4	2	2	2	4	3	3	3	4	2	4	2	2	3	3	2	2	3	2	3	1	1	1
640	42	1	2	2	3	2	2	2	1	5	5	4	5	5	2	2	4	4	2	2	2	2	3	3	3	2	4	2	3	1	5	2	2	2	4	2	4	4	4	4	4	4	4	4	4	4	1	1	1
641	31	2	1	2	2	2	2	2	1	4	4	4	4	4	4	4	4	3	1	3	3	3	2	4	2	2	3	2	3	2	3	2	2	2	4	3	3	2	2	3	3	2	2	3	3	3	0	1	1
642	52	2	1	2	2	1	2	3	1	4	4	4	4	4	4	4	4	4	4	3	4	4	4	4	4	4	5	5	1	1	5	1	3	2	4	2	4	5	5	4	4	1	5	4	5	2	2	2	2
643	42	1	1	1	2	1	2	3	1	1	1	1	1	1	1	1	4	1	1	1	1	3	4	1	1	1	1	1	1	1	1	1	1	1	1	1	1	1	1	1	1	1	1	1	1	1	0	0	0
644	47	2	1	1	2	1	2	3	1	5	5	5	5	5	1	1	1	1	1	5	1	1	4	5	3	5	5	1	5	1	5	1	1	5	5	1	5	1	1	5	5	1	1	5	1	5	0	0	0
645	52	1	1	2	2	1	2	4	1	2	4	4	4	4	2	2	2	2	2	2	2	2	2	2	2	2	4	2	4	2	4	4	4	4	4	2	2	4	2	4	4	4	4	4	4	4	1	2	2
646	29	1	1	1	3	1	2	3	1	4	4	4	4	4	2	4	4	2	1	2	2	2	2	2	2	2	2	2	2	2	2	2	2	2	2	2	2	2	2	2	2	2	2	2	2	2	0	0	0
647	26	1	2	1	3	2	2	2	1	3	4	2	4	4	2	2	4	4	1	3	2	2	3	3	3	2	4	3	3	1	3	3	3	3	4	3	3	3	3	4	3	4	3	3	3	3	0	0	0
648	27	2	3	2	2	1	2	3	1	4	5	5	4	5	2	2	2	2	1	3	3	3	3	3	3	2	4	2	5	2	5	2	1	4	5	1	4	1	2	4	5	1	2	4	4	4	1	1	0
649	42	1	2	2	3	1	3	5	1	3	3	3	3	3	4	2	2	2	1	2	2	2	2	2	3	1	3	3	3	2	3	2	2	2	3	2	3	2	2	3	3	2	2	3	3	3	1	1	1
650	39	1	2	1	3	1	2	5	1	2	1	2	3	3	1	2	2	1	1	2	3	1	4	1	2	2	3	4	1	2	4	3	5	3	4	2	3	2	2	3	3	3	3	4	4	4	1	1	1
651	33	1	2	1	2	1	3	3	1	4	4	4	4	4	2	3	3	2	1	2	2	2	2	4	2	2	3	4	3	2	3	2	2	3	4	2	4	4	4	4	4	4	4	4	4	4	1	1	1
652	36	1	2	3	3	1	2	4	1	3	3	3	3	5	4	2	2	1	1	3	2	2	2	4	2	2	5	2	4	2	5	2	2	4	5	2	5	2	2	4	4	2	2	4	2	5	0	0	0
653	27	1	2	1	3	1	2	2	1	4	4	4	4	2	2	2	2	2	2	2	2	2	2	4	2	2	4	2	3	1	1	2	1	4	4	1	4	3	2	3	4	2	3	2	3	3	1	1	1
654	47	2	1	2	2	1	3	2	1	4	4	4	4	4	3	2	2	2	2	2	3	3	4	4	2	2	4	2	4	2	4	2	2	2	3	2	2	3	3	3	3	3	3	3	3	3	1	1	1
655	51	1	1	2	2	1	2	4	1	4	4	4	4	4	2	2	3	3	1	2	2	2	4	4	2	2	5	2	1	2	4	4	1	4	4	2	4	2	1	4	4	2	2	4	2	2	0	0	1
656	48	2	1	2	2	1	3	4	1	4	5	4	4	5	3	2	2	2	1	2	2	2	2	2	2	2	3	2	3	2	3	2	2	2	4	2	3	2	2	4	4	2	2	3	3	3	1	1	0
657	45	1	1	2	2	1	3	2	1	4	4	4	4	4	4	4	4	2	1	2	2	2	2	2	2	2	4	1	4	1	4	1	4	4	4	1	4	1	4	4	4	1	2	4	4	2	0	0	0
658	56	2	1	2	2	1	2	2	1	4	4	4	4	4	2	2	2	4	1	3	2	1	4	1	4	4	4	2	4	2	4	2	2	2	4	2	4	2	2	3	4	2	2	2	2	4	0	0	1
659	44	1	2	2	2	1	4	5	1	3	3	3	3	4	2	2	2	4	2	4	2	2	2	4	2	2	4	4	4	1	4	4	2	2	3	4	4	1	3	4	4	4	1	2	1	4	0	0	0
660	20	1	2	1	3	1	2	1	1	5	5	4	4	4	3	2	2	2	1	2	3	2	2	1	2	2	3	2	4	4	4	2	2	4	4	4	4	4	2	2	2	2	2	2	2	2	1	1	1
661	51	1	1	2	2	1	2	4	1	4	4	4	4	4	3	3	3	2	2	2	3	3	4	3	2	2	3	3	3	3	3	3	3	2	3	3	3	3	3	3	3	2	3	3	3	3	1	1	1
662	43	1	1	2	2	1	2	4	1	4	4	4	4	3	5	3	3	2	1	1	4	2	4	5	3	1	4	3	2	2	4	4	3	4	4	2	3	4	3	3	4	4	2	4	2	3	0	1	2
663	42	1	2	2	3	1	2	3	1	5	5	5	4	5	3	2	2	2	1	4	2	1	2	4	1	1	5	2	4	1	5	1	1	5	5	1	4	1	1	5	5	1	1	5	1	5	0	1	0
664	49	2	1	2	2	1	2	4	1	5	5	5	4	5	1	2	2	2	1	4	2	1	2	4	1	1	5	1	4	1	5	1	1	5	5	1	4	1	1	5	5	1	1	5	1	5	0	1	0
665	36	1	1	2	2	1	3	3	1	3	3	3	3	3	4	3	4	3	3	3	2	2	2	4	3	1	3	3	3	3	3	3	3	3	3	3	3	3	3	3	3	3	3	3	3	3	1	1	1
666	52	1	1	1	2	1	2	3	1	3	4	4	4	4	4	4	4	4	4	3	4	3	4	3	2	2	3	2	1	1	4	4	4	1	3	4	4	1	1	1	2	2	3	3	3	3	1	0	0
667	48	1	2	1	2	1	3	4	1	4	4	3	4	4	2	4	4	4	1	2	2	3	2	4	4	4	5	1	1	1	4	4	4	4	4	4	4	1	1	4	4	4	1	4	2	4	0	0	0
668	51	1	2	2	2	1	3	2	1	3	3	3	3	3	4	3	4	3	1	3	3	3	5	3	2	2	3	3	3	3	3	3	3	3	3	4	4	2	3	3	3	3	3	3	4	4	2	1	1
669	34	1	1	2	2	1	3	2	1	5	4	4	5	5	5	4	4	4	1	4	5	4	4	4	3	2	4	1	4	1	4	1	1	4	4	2	4	1	1	3	3	1	1	3	1	4	0	0	0
670	32	1	2	2	2	1	2	2	1	3	4	1	4	3	4	4	5	4	5	5	5	4	4	5	1	2	4	4	4	4	5	4	4	4	4	4	4	3	4	3	4	4	5	4	4	4	3	2	3
671	25	1	2	1	3	1	2	4	1	4	4	4	4	4	2	3	3	3	1	2	3	2	4	3	3	1	4	2	4	2	4	3	2	3	4	2	4	2	2	4	4	2	2	3	2	3	1	0	1
672	27	1	2	2	2	1	1	3	1	3	4	3	3	4	3	3	3	3	1	3	2	1	3	3	2	2	4	2	3	3	3	3	3	3	3	3	3	3	3	3	3	3	3	3	3	3	1	1	0
673	26	2	3	1	3	1	2	3	1	4	5	5	4	5	1	2	3	2	1	3	2	3	3	4	2	2	3	2	4	2	4	2	4	4	4	2	4	2	2	3	4	3	2	4	2	4	0	1	1
674	45	1	1	2	2	1	3	2	1	3	3	3	3	4	2	2	2	2	1	2	2	2	4	4	2	2	3	2	2	1	3	2	2	2	1	1	1	1	1	1	1	1	1	1	1	1	0	0	0
675	33	1	1	1	3	1	1	4	1	4	4	4	4	4	2	2	2	2	1	2	2	2	4	4	2	2	4	1	4	1	4	1	1	1	4	2	2	1	1	4	4	1	1	4	1	4	0	0	0
676	42	1	1	2	2	1	3	2	1	2	4	3	4	4	4	2	2	3	2	2	2	2	2	4	2	2	4	2	2	2	5	2	2	2	2	2	4	2	1	5	5	5	1	5	5	5	1	1	1
677	46	2	1	3	3	1	3	5	1	4	5	4	4	5	2	2	2	3	1	3	3	3	3	3	3	3	4	4	4	4	4	4	4	4	4	4	4	4	4	4	4	4	4	4	4	4	1	1	1
678	44	2	1	2	3	1	2	5	1	4	4	4	4	4	1	3	2	2	1	3	3	3	2	4	3	3	4	1	3	2	4	2	2	4	4	2	4	2	2	2	4	2	2	3	2	4	0	0	0
679	25	2	1	2	3	1	2	5	1	5	5	5	5	5	5	4	4	4	1	4	4	2	4	5	3	3	4	1	4	1	4	3	1	2	4	1	4	1	1	3	4	1	1	3	1	4	0	0	0
680	34	1	2	2	3	1	3	5	1	3	4	2	4	4	4	2	2	2	1	3	2	1	2	2	2	3	4	4	3	2	3	2	2	3	3	3	3	2	2	4	4	4	3	3	3	3	1	1	0
681	33	1	2	2	3	1	2	3	1	4	4	4	4	4	2	2	2	2	1	2	2	2	3	4	2	2	3	1	3	2	4	2	3	3	3	3	3	1	2	3	3	2	3	4	2	4	0	0	0
682	30	1	1	1	3	1	2	4	1	4	4	4	4	4	2	4	4	2	4	2	4	2	2	4	2	2	2	2	2	2	4	4	2	2	2	4	4	2	4	2	4	2	2	2	2	2	1	1	1
683	42	1	2	2	4	2	2	3	1	4	4	4	4	4	2	2	2	2	2	2	2	2	4	4	2	2	4	2	2	2	3	4	2	2	4	2	2	2	2	2	2	2	2	2	2	2	0	0	0
684	38	1	2	2	2	2	2	4	1	2	3	2	2	2	4	2	2	2	1	4	2	2	2	4	2	4	2	2	2	2	3	3	4	4	2	3	2	3	1	2	5	1	1	5	5	5	1	1	0
685	41	1	1	2	3	1	3	4	1	2	4	4	4	4	3	3	3	3	1	3	4	2	2	1	3	1	3	2	4	2	4	2	2	4	4	4	4	2	2	4	4	3	2	4	2	4	1	1	0
686	46	2	1	2	2	1	3	4	1	4	5	4	4	4	2	2	2	2	1	3	3	3	3	3	2	1	3	2	3	2	3	3	2	4	3	2	2	2	2	3	4	2	2	4	4	3	1	0	2
687	45	2	1	2	3	1	2	5	1	4	4	4	4	4	4	4	4	4	4	4	4	2	4	4	2	2	4	4	4	4	4	4	4	4	4	4	4	4	4	4	4	4	4	4	4	4	0	0	0
688	41	2	1	2	2	1	2	4	1	5	4	4	4	5	2	2	2	2	2	2	2	2	3	3	3	1	4	2	2	1	4	1	1	1	1	1	1	1	1	3	3	1	1	1	1	1	0	0	0
689	44	1	1	2	3	1	3	5	1	4	4	2	4	5	1	1	4	1	1	1	3	1	3	3	1	1	3	2	4	1	4	4	3	3	3	3	4	2	3	3	3	3	3	3	3	3	1	1	1
690	40	1	1	2	4	1	3	2	1	5	4	3	3	4	2	2	3	3	1	2	2	3	3	3	2	2	4	2	4	2	5	2	2	2	4	2	3	2	3	4	4	2	2	4	2	4	1	1	0
691	46	2	1	3	4	1	3	4	1	4	4	3	4	5	5	2	4	5	1	3	4	3	3	4	2	2	4	1	4	1	4	1	1	1	5	2	4	2	1	4	4	1	1	4	1	4	0	1	1
692	40	1	2	2	3	1	4	5	1	4	4	4	4	4	2	2	2	2	1	2	2	2	4	4	2	4	5	1	5	2	5	4	1	4	4	4	4	4	1	4	4	2	2	4	1	4	0	0	0
693	50	1	1	2	3	1	3	5	1	4	4	4	4	4	2	2	2	2	1	2	2	2	3	4	2	2	4	2	4	2	4	2	2	2	4	2	4	2	2	2	4	2	2	4	2	4	1	0	1
694	38	1	1	1	3	1	3	3	1	4	4	4	4	4	2	2	3	2	1	1	1	1	2	1	4	4	4	3	3	2	2	3	3	3	3	3	3	3	3	3	3	3	3	3	3	3	0	0	0
695	40	1	2	2	3	1	2	4	1	4	4	4	4	4	2	2	2	2	1	2	5	1	4	4	2	2	2	2	2	1	4	1	2	3	2	1	4	2	1	2	2	2	2	2	2	2	1	1	1
696	33	1	1	1	3	1	2	2	1	4	4	4	4	4	2	2	2	2	2	2	2	2	2	2	2	2	2	2	4	2	4	2	4	2	4	4	4	2	4	4	4	4	2	2	4	4	1	1	1
697	37	1	1	1	3	1	4	3	1	4	4	4	4	4	5	5	3	4	3	4	4	3	3	3	3	5	3	2	2	2	3	3	2	2	2	2	2	2	2	2	2	2	2	3	3	3	1	1	1
698	39	1	2	1	3	1	2	4	1	4	4	4	4	4	2	2	2	3	1	2	2	2	3	3	2	2	4	2	2	2	4	4	2	4	4	2	4	2	4	2	4	4	2	2	2	4	1	1	1
699	47	1	1	2	3	1	4	4	1	3	4	3	3	3	3	3	3	3	1	3	2	1	3	3	2	2	5	1	5	1	5	1	1	5	5	1	5	1	1	5	5	5	5	5	5	5	1	1	0
700	20	1	1	1	3	1	1	4	1	2	4	4	4	4	2	2	2	2	1	2	5	1	4	4	2	2	5	1	1	1	5	2	2	2	4	2	4	2	2	2	4	4	2	2	2	2	1	1	1
701	42	2	1	2	3	1	3	5	1	4	4	4	4	4	4	2	4	2	2	2	4	4	3	4	2	2	4	2	4	2	4	3	2	4	4	2	4	2	2	4	4	2	2	4	1	4	1	1	1
702	26	2	1	2	3	1	2	5	1	5	5	4	4	4	2	2	4	2	1	2	2	2	2	4	1	3	4	2	2	2	3	2	2	2	3	2	3	2	2	2	3	2	2	2	2	3	0	0	0
703	29	1	2	2	3	1	2	3	1	4	4	4	4	4	1	2	2	3	1	2	4	2	2	4	4	4	5	1	2	2	5	2	2	4	4	2	4	2	2	4	4	2	2	4	2	4	1	1	0
704	39	1	2	2	3	1	2	4	1	1	4	4	4	4	4	4	4	4	4	3	4	4	4	4	4	4	1	1	1	1	1	1	1	1	1	1	1	1	1	1	1	1	1	1	1	1	0	0	0
705	30	1	3	2	3	2	3	2	1	3	4	3	3	4	3	4	3	2	1	3	3	3	3	3	2	1	3	3	3	3	3	3	3	3	3	3	3	3	3	3	3	3	3	3	3	3	1	1	1
706	33	1	2	2	3	2	2	3	1	3	4	3	3	4	3	4	4	4	4	3	4	4	4	4	4	4	2	2	2	2	2	2	2	2	2	2	2	2	2	2	2	2	2	2	2	2	1	1	0
707	30	2	3	1	3	1	3	2	1	5	5	5	5	5	2	2	2	2	1	2	4	3	2	4	4	3	3	2	3	2	4	2	3	2	3	3	3	2	2	2	3	4	2	4	3	3	0	1	1
708	42	2	2	2	3	1	3	4	1	4	4	4	4	4	3	4	4	2	1	2	1	1	4	1	3	1	3	1	2	1	5	3	1	5	5	2	3	2	1	3	5	2	1	5	1	5	0	1	1
709	23	2	3	1	1	1	2	2	1	4	4	4	4	4	2	2	2	2	2	2	4	2	2	4	2	2	3	3	3	2	4	2	2	2	4	2	2	2	2	4	4	2	2	4	2	4	0	0	0
710	29	2	2	2	3	1	3	2	1	3	3	3	3	4	2	1	2	2	1	2	2	4	4	4	1	1	5	3	3	3	3	3	3	3	3	3	3	3	3	3	3	3	3	3	3	3	1	1	1
711	26	2	3	1	3	1	2	2	1	4	4	4	4	4	2	2	2	2	2	2	1	2	2	2	2	2	4	2	4	2	4	2	2	4	4	2	4	2	2	4	4	2	2	4	2	4	1	1	1
712	37	1	2	2	3	1	2	4	1	3	4	3	3	3	3	2	3	2	1	2	3	3	3	3	2	2	4	2	4	2	4	4	4	2	2	2	4	2	4	4	4	2	2	4	4	4	1	1	1
713	30	2	2	2	3	1	2	4	1	3	4	2	4	3	4	4	3	3	2	4	2	2	2	4	3	2	1	1	1	1	1	1	1	1	1	1	5	1	1	5	5	5	5	5	5	5	0	1	2
714	32	1	3	2	3	1	2	3	1	4	5	4	5	5	4	2	4	2	3	2	4	4	3	4	4	4	1	2	2	3	2	2	3	3	3	2	3	2	3	3	2	3	3	3	3	2	1	2	1
715	36	1	2	2	4	1	2	4	1	4	4	4	4	4	2	2	2	2	1	2	5	5	4	4	2	2	5	1	1	1	5	1	2	2	4	2	4	2	2	2	4	2	2	2	2	2	1	1	1
716	26	2	2	2	2	1	2	4	1	3	4	3	3	4	3	3	4	3	1	3	3	3	3	3	2	2	4	2	3	2	4	2	2	4	4	2	4	2	2	4	4	2	2	4	2	3	0	0	1
717	40	1	2	2	3	1	3	4	1	4	4	4	4	4	4	2	2	2	1	2	2	2	2	4	1	3	3	2	4	2	4	2	2	4	3	4	4	3	4	4	3	4	1	1	1	1	1	0	0
718	30	2	1	2	3	1	2	4	1	4	4	4	4	4	2	4	2	2	1	2	2	2	2	4	2	4	4	2	3	2	4	1	1	1	4	1	4	1	1	4	4	1	1	4	1	3	0	1	0
719	48	1	1	2	3	1	3	4	1	5	5	5	5	5	5	1	1	1	1	1	1	1	4	1	1	1	5	1	1	1	5	1	1	3	5	1	5	5	1	5	5	1	1	3	1	1	0	0	0
720	36	1	1	2	3	1	3	5	1	4	4	4	4	3	2	2	2	3	1	2	2	2	3	3	2	1	4	3	4	2	4	4	3	4	4	2	3	3	2	3	3	2	2	4	4	4	0	0	0
721	32	1	2	2	4	1	3	4	1	3	4	3	4	4	2	3	3	3	1	3	3	3	3	4	2	2	3	1	2	2	5	3	3	3	4	3	3	2	2	4	4	2	2	4	3	3	1	1	1
722	33	2	2	2	3	1	2	4	1	4	4	4	4	3	2	2	2	2	2	3	2	2	2	4	2	4	5	2	1	1	3	1	1	1	3	1	3	1	1	3	3	1	1	1	1	1	0	0	1
723	33	1	1	2	3	1	2	4	1	2	4	1	4	4	3	2	2	2	1	2	2	3	3	3	2	2	4	2	4	2	4	2	2	2	4	2	4	2	2	4	4	1	2	4	1	3	1	1	0
724	23	2	2	2	2	1	2	3	1	3	3	3	3	5	3	5	4	3	5	3	3	5	4	5	3	4	3	4	3	4	3	3	4	3	5	4	4	4	3	4	4	4	5	4	4	4	2	3	2
725	35	1	1	2	3	1	3	4	1	3	1	3	4	4	4	4	3	4	4	3	3	3	2	4	1	4	2	2	3	2	2	4	2	3	3	2	3	3	2	2	3	2	2	2	3	3	1	1	2
726	38	2	2	2	3	1	3	4	1	4	5	4	4	4	1	2	2	4	1	2	2	2	2	2	2	2	5	1	5	1	5	1	1	5	5	1	5	1	1	5	5	5	1	5	5	5	0	0	0
727	34	1	2	2	3	1	3	4	1	3	3	3	3	3	2	2	2	2	2	3	3	2	3	3	2	2	2	3	2	2	3	4	2	4	2	4	2	2	3	2	3	2	3	3	3	2	0	1	1
728	38	1	1	2	3	1	3	2	1	3	3	3	3	3	2	2	3	2	1	2	4	2	2	2	1	1	5	1	5	1	5	2	1	5	5	1	3	2	4	4	4	2	4	4	4	4	1	1	1
729	47	2	2	2	3	2	2	3	1	4	4	4	4	4	4	4	4	4	4	3	3	3	3	3	1	3	3	3	3	3	3	3	3	3	3	3	3	3	3	3	3	3	3	3	3	3	0	0	0
730	22	1	2	1	4	2	2	2	1	4	4	4	4	4	1	1	1	1	1	4	3	1	3	3	1	1	4	1	4	1	5	1	1	2	5	2	5	5	1	5	5	1	1	1	1	1	0	0	1
731	50	2	2	2	3	1	3	2	1	5	5	3	3	2	3	3	4	3	1	5	4	4	5	5	3	3	1	2	3	2	3	3	3	3	3	1	1	4	2	3	3	3	2	1	3	5	1	1	1
732	30	2	2	2	3	2	3	2	1	2	1	2	3	2	2	1	3	3	2	3	1	3	3	3	3	3	1	2	2	2	2	2	2	2	2	1	1	1	2	1	1	1	1	1	1	1	0	0	0
733	41	2	3	2	2	1	2	3	1	4	4	4	4	4	2	2	2	2	1	2	2	2	2	4	4	4	4	2	2	2	4	4	4	4	4	4	4	2	2	4	4	4	2	4	2	4	0	0	0
734	31	2	3	2	3	2	3	2	1	5	5	5	5	4	2	2	2	2	1	3	1	1	4	4	2	2	3	2	3	2	4	2	2	4	4	2	4	2	2	4	4	2	2	3	2	4	1	1	1
735	33	2	2	2	3	2	3	2	1	4	5	4	4	4	3	3	2	4	1	4	3	3	3	3	1	3	3	3	2	2	3	3	3	3	3	3	3	3	3	3	3	3	3	3	3	3	1	1	1
736	24	2	2	2	3	1	2	2	1	2	3	3	2	3	3	3	3	3	1	3	3	3	3	3	2	1	4	4	1	1	4	4	4	4	4	4	4	1	2	3	3	4	4	4	4	4	1	1	1
737	52	1	1	3	4	1	2	4	1	5	4	4	5	4	3	3	2	5	1	4	4	2	4	3	3	3	5	1	4	1	5	2	1	5	4	1	5	1	1	4	4	1	1	5	1	4	0	0	0
738	38	2	1	2	3	1	3	3	1	3	3	2	3	3	4	2	3	2	1	3	3	3	3	3	2	1	3	3	3	3	3	3	2	2	2	2	2	3	3	3	2	2	2	2	2	3	2	2	1
739	31	1	2	1	3	2	3	3	1	4	4	1	4	4	2	2	2	4	2	2	2	2	3	3	2	2	3	2	2	2	3	3	2	2	3	2	3	2	3	3	3	2	2	2	2	2	1	1	1
740	53	2	1	2	3	1	3	4	1	4	4	4	4	4	4	2	2	2	1	2	2	2	2	2	2	2	4	2	4	2	4	2	2	2	4	3	3	2	3	3	3	2	3	2	3	3	1	1	1
741	33	2	1	2	3	1	3	5	1	1	3	1	1	3	4	3	4	3	1	3	2	2	3	3	2	2	2	3	3	3	2	3	3	2	2	2	2	3	3	2	2	3	3	3	3	3	2	1	1
742	33	2	2	2	3	1	2	2	1	2	3	3	2	3	4	2	4	2	2	2	2	2	2	4	2	2	4	1	4	2	4	2	2	2	4	2	2	2	2	3	3	2	2	3	2	2	1	1	1
743	25	2	2	1	1	1	1	2	1	5	5	4	4	4	3	3	3	2	1	3	1	1	4	1	3	1	4	2	2	2	3	2	2	3	3	2	2	2	2	3	3	2	2	2	2	2	1	1	1
744	30	1	2	2	3	1	2	5	1	4	4	4	4	4	1	1	1	3	1	1	4	1	4	3	1	1	2	2	2	2	5	2	2	2	4	2	1	2	2	4	1	1	1	2	1	1	1	1	0
745	28	1	2	2	3	2	4	2	1	4	4	1	4	4	1	1	4	1	1	1	1	1	2	2	1	1	5	5	5	1	5	1	1	1	5	1	5	1	1	5	5	1	1	3	1	3	0	0	0
746	37	1	3	2	3	2	4	2	1	4	4	4	4	4	2	4	3	2	2	2	2	3	3	3	3	3	4	1	3	2	4	2	1	3	4	1	4	1	3	4	4	1	2	3	1	4	1	1	0
747	34	1	2	2	3	1	2	3	1	2	3	4	3	5	3	3	4	1	1	1	3	1	3	3	2	1	3	2	4	2	4	3	2	4	4	2	4	2	1	4	4	4	4	4	4	4	1	1	0
748	44	2	3	2	3	1	2	3	1	3	3	3	3	3	4	3	3	3	3	3	3	3	3	3	1	3	3	3	3	3	3	3	3	3	3	3	3	3	3	3	3	3	3	3	3	3	1	1	1
749	49	1	3	2	3	1	4	2	1	4	4	4	4	4	2	4	2	4	1	4	4	4	4	3	2	2	5	1	3	2	4	2	2	2	5	2	2	2	2	3	4	2	2	4	2	4	0	1	0
750	39	2	3	2	3	1	4	3	1	3	3	3	3	4	2	2	2	2	1	2	2	2	2	2	2	2	4	3	2	4	3	3	4	3	3	4	3	4	4	3	3	4	3	4	2	3	2	3	1
751	37	1	2	2	3	2	4	3	1	5	5	5	5	5	1	1	1	1	1	4	1	1	4	1	1	1	1	1	1	1	5	1	1	5	5	1	5	1	1	5	5	1	1	1	1	5	0	0	0
752	23	2	2	2	3	1	1	3	1	4	4	4	4	4	2	2	2	2	2	2	2	2	2	4	2	2	3	1	4	1	4	2	1	2	4	3	4	1	2	2	4	2	4	2	2	4	1	0	0
753	27	1	2	1	2	1	2	2	1	5	5	5	5	5	1	2	2	2	2	3	3	2	3	3	2	2	3	1	3	1	5	5	5	5	3	5	2	2	2	3	3	3	3	3	2	3	1	1	1
754	39	2	1	2	2	1	3	2	1	3	4	4	4	4	1	2	2	2	2	3	4	2	4	4	2	2	4	1	3	1	4	1	2	4	4	3	3	1	2	2	4	2	2	2	2	3	0	0	0
755	34	1	1	2	3	1	2	5	1	4	4	4	4	4	2	2	2	2	1	2	2	2	2	2	2	2	3	2	3	2	3	3	3	3	3	3	3	2	2	3	3	3	2	3	2	3	1	1	1
756	38	1	1	3	3	1	3	5	1	4	4	4	4	4	4	4	4	3	4	4	4	4	4	4	4	4	4	4	4	4	4	4	4	4	4	4	4	4	4	4	4	4	4	4	4	4	0	0	0
757	41	1	1	3	3	1	3	5	1	3	3	3	3	3	4	4	4	3	3	3	3	3	3	3	1	3	3	2	4	2	3	2	2	3	3	2	4	2	2	3	3	3	3	3	3	3	3	3	3
758	33	1	2	2	3	1	2	5	1	4	4	4	4	4	2	3	3	4	1	5	4	3	3	3	2	2	3	2	2	2	4	2	2	2	3	3	3	2	3	3	3	3	3	3	3	3	1	1	1
759	30	1	2	2	3	1	2	5	1	3	4	3	3	4	4	2	1	1	2	2	4	3	2	1	2	3	3	1	4	2	4	4	1	4	1	1	1	1	1	1	1	1	1	1	1	1	1	1	1
760	41	1	1	2	3	1	3	5	1	3	3	3	3	3	4	3	4	3	3	3	3	3	3	3	1	3	3	3	4	2	4	2	2	2	4	2	4	2	2	2	2	2	2	4	4	4	1	1	2
761	35	1	3	2	3	1	2	5	1	3	3	4	3	3	3	5	5	3	5	3	5	5	5	5	1	1	3	3	3	3	3	3	3	3	3	3	3	3	3	3	3	3	3	3	3	3	1	1	1
762	37	1	3	2	3	1	3	5	1	4	4	2	2	4	5	5	2	2	1	4	3	1	4	4	3	3	4	2	4	2	4	2	1	5	5	1	5	5	2	4	5	5	2	4	2	5	3	1	1
763	30	2	3	1	2	1	2	2	1	5	5	4	4	4	2	2	2	4	1	4	2	2	2	4	2	4	5	1	4	1	4	2	2	4	4	2	4	2	2	4	4	2	2	4	2	4	1	1	1
764	33	1	3	2	3	1	2	5	1	4	5	4	4	4	2	2	2	2	1	4	2	2	4	4	2	2	4	2	4	2	4	3	2	4	4	2	3	2	4	3	4	2	4	4	4	3	1	1	1
765	34	1	2	2	3	1	2	5	1	2	3	1	1	4	4	4	4	4	1	4	4	5	5	4	1	1	2	4	2	4	4	4	4	4	4	4	2	4	4	4	4	4	4	4	4	4	1	2	2
766	34	1	2	2	3	1	3	2	1	5	5	5	5	5	5	5	5	3	1	3	2	2	3	4	3	2	5	1	5	1	5	1	1	1	4	1	1	1	1	3	3	3	1	1	1	1	1	1	0
767	38	1	2	2	2	1	3	2	1	4	5	4	4	4	2	1	4	1	1	1	1	2	2	1	1	4	1	2	1	1	4	2	2	2	2	2	4	2	1	2	3	2	2	2	2	2	1	1	1
768	50	2	2	2	2	2	2	3	1	5	5	5	5	5	1	2	3	3	1	5	2	2	3	3	2	2	3	2	2	3	2	3	3	3	3	3	3	2	3	2	3	2	2	3	2	2	1	2	1
769	34	1	3	3	3	1	4	2	1	1	4	4	4	4	2	2	2	2	1	2	2	2	3	4	2	2	4	1	4	1	4	1	1	1	4	1	4	1	1	4	4	1	1	4	1	4	1	0	1
770	48	2	2	2	3	2	2	2	1	3	4	3	3	3	3	3	4	3	1	3	3	3	3	3	3	2	3	3	2	3	4	2	3	2	2	2	2	2	2	2	2	2	3	3	3	3	1	1	1
771	37	1	2	2	3	1	2	3	1	4	3	3	4	3	3	3	4	2	1	3	4	4	4	4	2	2	3	3	2	3	3	3	2	2	2	4	2	4	2	3	2	3	2	2	2	2	2	2	2
772	40	1	2	2	2	1	2	2	1	4	4	4	4	4	4	4	4	3	3	3	3	3	3	4	4	4	1	1	1	1	1	1	1	1	1	1	1	1	5	1	1	1	1	1	1	1	1	0	0
773	43	1	2	2	3	1	4	2	1	4	4	4	4	4	4	4	4	4	1	4	3	4	3	4	4	4	4	4	1	2	2	1	1	1	1	1	4	4	4	2	4	4	1	2	2	1	1	1	1
774	38	1	2	2	3	1	2	3	1	4	4	4	4	4	2	2	2	2	1	2	2	2	2	4	2	2	4	2	3	2	4	4	4	4	4	4	4	2	4	4	4	2	2	4	2	4	1	1	1
775	48	1	2	2	3	1	2	3	1	4	4	3	3	4	2	3	3	3	1	2	2	3	2	4	1	3	3	2	3	2	3	3	3	3	3	2	2	3	2	2	3	2	2	3	3	3	0	0	1
776	47	2	2	2	2	1	2	3	1	3	4	4	4	4	5	4	4	4	5	4	4	4	4	3	2	2	1	1	2	1	1	1	1	2	2	1	4	1	1	1	1	1	1	1	1	1	1	1	1
777	44	1	2	2	3	1	2	3	1	3	4	4	4	4	4	2	2	2	1	2	2	1	2	4	2	2	4	2	3	1	5	2	2	2	3	2	4	2	2	3	4	2	2	2	2	4	1	1	1
778	44	2	2	2	3	1	4	2	1	3	3	4	3	3	2	2	2	2	1	2	2	2	2	4	2	2	4	2	3	2	4	2	2	2	3	2	3	2	3	3	3	2	2	2	2	4	1	1	1
779	55	1	2	2	2	1	2	3	1	3	4	3	3	3	2	2	2	2	1	2	2	2	2	4	2	2	4	2	3	1	5	2	2	2	3	2	4	2	2	3	3	2	2	2	2	4	1	1	1
780	43	2	2	2	3	1	4	2	1	3	4	3	3	3	2	2	2	2	1	2	2	2	2	4	2	2	4	2	3	1	5	2	2	2	3	2	3	2	2	3	3	2	2	2	2	3	1	1	1
781	52	1	2	2	3	1	2	3	1	4	4	4	3	4	2	2	2	2	1	4	2	3	3	3	2	2	3	2	2	1	5	2	2	2	3	3	5	2	3	3	5	2	2	3	3	3	1	1	0
782	40	1	1	3	3	1	3	4	1	3	3	3	3	2	2	2	2	2	2	2	2	2	4	4	2	2	5	1	3	1	5	1	1	2	4	2	2	2	2	3	4	2	2	4	2	4	0	1	0
783	46	1	1	3	3	1	3	4	1	3	3	2	3	3	4	3	4	4	3	3	4	4	4	4	3	2	3	3	3	4	3	4	3	4	2	2	2	3	3	3	4	3	3	2	2	2	1	1	1
784	34	1	3	2	3	1	3	4	1	1	1	1	1	3	5	4	5	3	1	5	5	5	5	5	2	2	1	5	1	5	1	5	5	5	1	5	3	5	5	1	3	5	5	1	5	1	2	3	3
785	32	1	3	2	3	1	2	2	1	4	4	4	4	4	4	2	4	4	2	4	4	4	4	4	2	2	3	3	1	1	4	4	3	3	3	2	3	3	3	3	3	3	3	3	3	3	1	1	1
786	39	2	2	2	2	1	3	2	1	4	4	4	4	4	2	2	2	4	2	4	3	4	3	4	3	2	3	2	2	1	5	5	3	5	4	5	5	3	3	3	3	5	2	5	5	3	1	1	1
787	45	1	1	2	3	1	3	5	1	3	3	3	3	3	4	5	3	3	3	3	3	4	4	3	2	3	4	3	2	2	4	4	4	5	5	5	5	2	3	5	5	5	2	4	4	5	0	1	0
788	24	2	3	1	2	1	2	2	1	4	4	4	3	3	3	3	3	3	1	3	3	3	4	4	3	3	4	2	4	2	4	2	2	1	4	2	3	2	2	3	4	2	2	2	2	3	1	0	1
789	37	1	3	2	3	1	2	3	1	4	4	4	3	4	5	4	3	4	1	3	5	2	4	5	1	1	3	2	1	1	3	1	1	1	3	1	3	1	1	1	1	1	1	1	1	1	1	1	0
790	23	2	3	1	2	1	2	2	1	4	4	3	3	4	3	4	3	1	1	1	2	3	4	4	1	1	1	1	2	1	2	2	2	4	2	1	1	1	1	1	1	1	1	2	2	2	1	1	0
791	45	2	2	2	2	1	2	2	1	3	5	4	4	4	2	4	4	4	1	1	1	4	4	4	1	1	4	3	2	2	3	4	4	4	4	4	4	3	3	3	4	3	4	1	4	3	1	1	3
792	34	2	2	2	3	2	3	2	1	4	4	4	4	4	2	2	2	2	1	2	2	2	2	4	2	2	3	2	2	2	4	2	2	2	4	2	2	2	2	4	4	2	2	4	4	4	1	1	1
793	41	2	3	2	2	1	3	2	1	4	4	4	4	4	4	2	2	2	2	3	2	2	3	3	2	2	4	2	3	2	3	2	3	3	3	3	3	2	3	3	3	2	3	3	4	4	1	1	1
794	35	2	2	2	2	1	2	2	1	4	4	3	3	4	3	2	4	2	1	3	4	5	5	5	2	2	3	2	3	2	4	2	2	2	3	2	3	2	2	3	3	3	3	3	3	3	1	1	0
795	39	2	3	2	3	1	3	2	1	3	4	3	3	4	2	3	3	4	1	3	3	4	4	4	3	4	3	2	4	3	4	3	3	3	3	4	3	3	3	3	3	4	4	3	3	3	1	2	2
796	44	2	1	3	3	1	3	3	1	4	4	4	4	4	2	1	4	1	1	1	1	3	2	4	1	1	4	1	4	1	4	1	1	1	4	1	4	1	1	4	4	1	1	4	4	4	0	0	0
797	47	1	1	2	2	1	3	5	1	5	5	5	5	5	1	1	1	1	1	1	1	1	4	1	3	1	3	2	4	2	3	2	2	3	3	2	3	2	2	3	3	2	2	3	2	3	0	0	0
798	30	1	2	2	2	1	2	5	1	1	1	1	1	1	1	1	4	1	5	3	1	5	5	5	1	1	3	3	3	2	3	2	3	3	3	3	3	2	2	3	3	3	3	2	2	3	1	1	1
799	32	1	3	2	4	2	4	4	1	5	5	3	5	4	5	4	3	3	1	3	5	2	4	5	1	1	3	2	3	2	5	2	2	3	5	4	4	1	2	2	3	2	2	3	2	3	1	1	3
800	21	1	3	1	1	2	2	2	1	4	4	4	4	4	1	1	1	1	1	2	1	1	4	4	3	3	4	1	4	2	4	4	2	4	4	2	3	2	3	4	3	3	1	1	1	1	0	0	0
801	25	2	3	1	2	1	2	2	1	5	5	5	5	5	2	3	2	2	1	3	3	3	2	4	2	1	5	3	5	1	5	3	2	1	5	1	5	3	4	5	5	5	2	3	4	4	1	0	1
802	34	2	3	2	3	2	2	2	1	4	4	4	4	4	4	3	3	4	2	4	5	5	3	4	4	4	4	2	2	2	4	3	3	3	4	2	4	2	3	4	3	3	2	4	2	3	1	1	1
803	33	2	2	2	2	1	2	2	1	4	4	4	4	5	4	4	4	4	4	3	2	2	4	4	2	2	5	1	5	1	5	1	1	5	5	1	5	1	1	5	5	1	1	5	5	5	0	0	0
804	28	2	3	1	2	2	3	2	1	4	4	4	4	4	4	4	4	4	1	3	4	2	2	4	1	3	3	3	3	3	3	3	3	3	3	3	3	3	3	3	3	3	3	3	3	3	1	1	1
805	29	1	2	1	4	2	3	3	1	3	3	3	3	3	3	3	4	3	4	3	3	4	4	4	3	4	3	4	5	1	4	1	1	5	5	2	4	1	4	4	4	2	4	4	3	2	2	2	1
806	38	1	3	2	3	2	4	4	1	3	3	3	3	3	3	2	2	3	1	3	2	1	2	4	1	1	3	2	3	3	4	3	3	3	3	3	3	3	3	3	4	2	2	4	4	2	1	2	1
807	24	1	3	1	2	2	1	2	1	5	5	5	4	3	4	3	3	4	4	4	4	4	4	4	4	4	1	1	1	1	1	1	1	1	1	1	1	1	1	1	1	1	1	1	1	1	0	0	0
808	44	1	1	2	3	1	2	3	1	5	5	5	5	5	1	1	1	1	1	5	1	1	4	1	2	3	4	2	4	1	4	1	2	2	4	2	4	2	2	4	4	1	1	4	1	3	0	0	1
809	39	1	2	2	3	1	4	4	1	3	3	3	3	3	3	3	4	3	3	3	3	3	3	3	1	3	3	1	1	1	4	1	1	1	1	1	1	1	1	1	4	1	1	1	1	1	0	0	0
810	32	1	1	2	3	1	2	3	1	4	4	4	4	5	2	2	2	3	2	4	4	3	3	3	2	2	4	4	4	2	3	2	3	2	2	2	3	2	3	2	4	4	4	4	2	4	1	1	1
811	35	1	1	2	4	1	2	3	1	2	4	4	4	4	2	4	2	4	4	4	4	4	3	4	4	4	4	4	4	2	3	2	3	3	2	2	3	2	3	2	4	4	4	4	2	4	1	1	0
812	43	1	2	2	2	2	1	3	1	5	5	5	5	5	4	4	3	2	1	4	2	2	2	4	3	2	5	5	5	1	5	1	3	4	4	1	5	5	3	2	4	2	4	3	2	4	1	0	0
813	40	2	2	2	2	1	2	3	1	3	4	3	4	5	2	2	2	3	1	2	2	3	3	4	2	2	4	2	3	1	4	3	2	4	4	2	4	2	2	3	4	2	2	4	1	4	1	1	1
814	38	1	2	2	3	2	2	3	1	4	4	4	5	5	2	4	2	3	1	3	2	2	2	4	3	1	5	2	2	1	5	2	2	2	4	1	3	3	2	4	4	2	2	4	4	3	0	1	1
815	35	2	2	2	3	1	2	5	1	4	4	4	4	4	2	2	2	2	1	2	2	2	2	2	2	2	2	2	3	3	3	2	3	3	3	3	2	3	4	3	3	2	3	2	3	3	1	3	3
816	34	2	2	2	3	2	2	5	1	5	5	4	4	5	2	2	2	2	1	4	2	2	3	3	1	1	4	1	1	1	4	2	1	4	4	2	2	2	2	3	4	2	2	3	2	3	0	0	1
817	35	2	2	2	3	1	2	5	1	2	3	2	4	4	2	2	2	3	2	2	2	2	3	3	2	2	4	1	2	2	2	2	2	2	2	2	3	2	2	2	2	2	2	2	2	5	1	1	1
818	32	2	2	2	3	1	2	5	1	4	3	4	3	4	2	4	4	4	5	3	4	2	4	4	4	4	1	1	2	1	3	1	4	3	4	4	1	1	1	1	1	1	1	1	1	1	0	0	0
819	30	2	3	2	2	1	2	3	1	3	3	3	3	3	3	3	3	3	3	3	3	3	3	3	1	3	4	1	4	1	3	2	2	2	2	2	2	2	2	2	2	2	2	2	2	2	1	1	1
820	35	1	3	2	2	1	3	3	1	5	5	5	5	5	2	2	2	3	3	3	3	3	3	3	1	3	1	1	1	1	1	1	1	1	1	1	1	1	1	1	1	1	1	1	1	1	0	0	0
821	25	2	3	1	2	1	2	2	1	4	4	4	4	4	2	4	1	4	2	2	3	3	4	4	1	1	4	2	3	2	4	2	2	2	3	3	3	2	3	4	4	3	2	2	4	4	0	0	1
822	23	1	3	1	3	1	2	3	1	4	3	3	3	3	2	2	3	3	1	4	4	4	4	4	2	2	2	2	1	2	4	4	4	4	4	4	4	2	4	3	3	3	3	3	4	4	1	1	2
823	27	1	2	2	2	2	3	3	1	5	4	4	4	4	4	4	3	2	1	1	2	3	3	1	2	3	3	1	3	2	4	2	2	4	4	2	4	1	2	4	4	2	2	3	2	4	0	1	1
824	27	1	3	1	2	1	2	3	1	4	4	4	4	4	4	4	4	1	1	1	1	4	4	4	1	3	3	3	3	3	3	3	3	3	3	3	3	3	3	3	3	3	3	3	3	3	1	1	1
825	35	1	2	2	3	1	4	4	1	4	3	3	4	4	2	2	2	2	1	3	4	2	2	4	2	2	4	2	4	1	5	1	2	3	4	2	4	2	2	4	4	2	2	4	2	4	0	0	0
826	42	1	2	2	3	2	3	3	1	4	3	3	4	4	2	2	3	3	1	3	4	4	4	4	2	2	2	3	1	2	4	4	4	4	4	4	4	2	2	4	4	4	4	4	4	4	1	1	2
827	40	2	1	2	3	2	3	4	1	3	3	3	3	4	3	3	3	3	3	3	3	3	3	3	2	2	1	4	2	2	4	4	4	2	2	4	4	2	4	4	4	4	4	4	4	4	0	1	1
828	35	1	2	3	2	1	2	4	1	4	4	4	4	4	3	2	2	2	1	4	4	3	3	4	2	2	2	3	2	2	2	4	4	2	2	3	3	4	3	2	3	2	4	2	4	2	2	1	1
829	32	1	1	2	2	1	3	4	1	3	3	3	4	3	3	3	3	3	3	3	3	3	3	3	1	3	1	2	1	1	1	1	1	1	1	1	1	2	1	3	3	3	3	3	3	3	1	1	1
830	34	1	2	2	3	1	2	5	1	4	4	3	2	1	2	2	2	3	4	3	3	3	3	3	2	2	3	2	2	2	4	3	2	3	2	3	3	2	2	3	3	2	3	3	2	4	2	1	1
831	48	2	2	2	3	1	4	5	1	3	3	3	3	3	3	3	3	3	3	3	3	3	3	3	1	3	4	2	4	1	5	1	1	1	4	4	4	4	4	4	4	1	4	4	4	4	1	1	1
832	47	2	1	2	3	1	2	4	1	5	4	4	4	4	2	2	2	4	1	3	3	3	3	3	2	1	3	2	1	2	3	1	1	3	4	2	2	2	2	4	4	2	2	4	2	4	1	1	1
833	37	2	3	2	4	2	1	5	1	3	3	3	3	2	2	3	3	3	1	3	3	3	3	3	2	2	3	2	2	2	3	2	2	2	2	2	3	2	2	3	3	3	2	3	2	3	1	1	1
834	30	1	2	1	3	1	3	4	1	3	3	3	3	3	2	2	2	2	2	2	2	2	2	4	2	2	3	1	3	1	2	2	3	2	2	2	2	2	2	3	2	2	2	2	2	2	1	1	1
835	39	1	3	3	3	1	3	2	1	4	4	4	4	4	4	2	4	4	1	1	2	3	4	3	2	2	3	1	3	2	4	2	2	4	4	2	4	2	2	4	4	2	2	4	2	3	1	1	1
836	24	2	3	1	2	1	2	4	1	3	4	3	4	4	3	3	4	2	2	3	2	2	3	3	3	4	2	2	1	1	1	2	2	2	1	2	1	2	1	1	2	2	2	2	2	2	1	0	0
837	23	1	3	1	2	2	2	2	1	4	4	3	4	3	3	4	4	3	4	4	4	2	2	4	3	3	4	3	4	4	3	4	4	3	4	3	3	4	4	4	3	3	4	4	4	4	2	2	1
838	46	1	2	2	2	1	2	3	1	4	4	4	4	4	4	4	4	4	4	4	3	3	3	3	2	1	4	2	3	5	3	3	2	3	3	2	3	3	3	3	3	3	3	2	2	2	1	1	1
839	35	1	2	2	2	1	2	3	1	4	4	4	4	4	2	2	2	3	1	2	2	2	3	3	2	2	3	2	3	1	3	2	2	3	4	2	3	2	2	3	3	2	2	3	2	3	1	1	1
840	51	1	3	2	3	1	3	2	1	4	4	4	4	4	4	3	2	3	3	3	4	3	3	4	2	2	4	3	2	2	4	3	2	4	4	4	4	2	1	2	4	2	2	4	2	4	1	1	1
841	39	1	2	2	2	1	1	3	1	3	3	3	3	4	2	4	4	4	4	3	4	2	2	4	2	1	2	2	2	2	3	3	2	2	2	3	2	3	2	3	2	2	2	3	2	3	1	1	1
842	50	1	2	2	2	1	2	3	1	5	3	4	4	4	4	4	4	2	3	2	3	4	4	4	3	5	1	1	3	3	2	3	3	3	3	3	2	2	2	3	3	2	3	3	4	2	1	2	2
843	54	1	2	2	2	1	2	3	1	4	4	4	3	4	2	2	2	3	1	2	2	2	3	3	2	2	3	5	3	1	3	3	3	3	3	3	3	1	3	3	3	3	3	3	3	4	1	1	1
844	47	1	2	2	3	2	2	3	1	4	4	4	4	4	4	4	4	4	4	3	4	4	4	4	4	4	3	4	2	1	1	1	1	1	1	1	1	1	1	3	3	3	1	3	1	3	0	0	0
845	50	1	3	2	3	1	1	3	1	4	4	2	4	4	4	3	4	2	1	3	3	3	3	3	1	1	3	2	3	2	3	2	2	3	3	2	3	2	2	3	3	3	3	3	2	3	2	1	1
846	56	1	2	2	3	2	2	3	1	4	4	4	4	4	2	2	2	2	1	2	2	2	4	3	3	2	3	2	3	2	4	4	4	4	4	2	4	2	2	4	4	2	2	4	2	4	0	1	0
847	38	2	2	2	3	1	2	2	1	3	4	3	3	4	2	3	3	3	2	3	3	3	4	3	3	2	2	2	2	2	2	3	3	2	3	3	3	2	3	3	3	2	3	3	3	2	1	1	1
848	41	1	2	2	2	2	2	3	1	4	4	4	4	4	2	2	3	2	1	2	2	2	3	4	2	2	3	2	3	1	4	2	2	4	4	2	3	4	3	4	4	2	2	4	3	4	1	1	0
849	53	1	2	3	3	2	1	2	1	3	3	3	3	3	3	3	3	2	3	3	3	3	3	3	3	3	3	3	3	3	3	3	3	3	3	3	3	3	3	3	3	3	3	3	3	3	2	2	2
850	42	1	2	2	3	1	2	2	1	3	4	4	3	4	1	2	2	2	1	3	2	2	3	4	2	1	3	1	2	1	5	2	3	3	4	1	3	2	2	4	4	2	2	4	2	4	0	1	1
851	37	1	2	2	2	2	1	3	1	3	4	3	3	3	3	3	2	3	2	3	3	2	3	3	2	2	3	2	3	2	4	2	3	3	3	2	3	2	2	4	4	2	2	4	3	4	2	1	0
852	38	1	3	2	3	1	2	3	1	5	5	5	5	5	1	2	2	2	1	1	1	1	2	4	2	2	4	1	4	1	4	2	2	1	4	2	4	2	2	4	4	2	2	4	2	4	0	0	1
853	39	1	2	3	2	1	4	3	1	4	4	4	4	4	4	4	4	4	4	3	4	4	3	3	2	2	4	2	4	4	4	2	2	2	2	2	3	3	2	2	2	2	2	2	3	3	1	1	1
854	48	2	2	3	2	1	1	3	1	4	4	4	4	4	2	2	2	2	1	3	3	3	3	5	3	2	3	3	2	2	3	2	2	3	3	2	3	2	2	2	3	3	3	3	3	3	1	1	0
855	46	1	1	2	2	1	2	3	1	3	3	3	3	3	3	3	3	2	3	3	3	3	3	3	3	3	3	3	2	2	3	3	2	2	3	3	3	2	4	2	3	3	2	3	3	2	1	2	1
856	50	1	1	2	2	1	2	3	1	3	4	4	4	4	4	1	4	4	4	1	1	1	4	4	3	4	4	4	4	4	4	4	4	4	4	4	4	4	4	4	4	4	4	4	4	4	0	0	1
857	49	2	2	3	3	1	1	3	1	4	4	4	4	4	2	4	4	2	1	4	2	3	3	3	1	1	4	3	3	4	4	3	2	2	2	4	3	2	3	2	4	3	3	3	2	4	2	1	2
858	30	1	2	3	3	1	2	3	1	3	3	2	3	3	2	3	3	2	1	4	4	4	3	4	1	1	2	3	2	2	2	3	4	4	3	2	3	2	2	2	3	2	4	4	4	4	1	1	2
859	34	1	2	2	3	1	3	4	1	4	4	4	4	4	2	2	4	2	1	4	2	3	3	3	1	1	4	3	3	4	4	3	2	2	2	4	3	3	4	2	4	3	3	3	2	4	2	1	2
860	46	1	2	3	2	1	2	3	1	5	4	3	4	4	3	2	4	4	1	2	2	2	2	2	2	2	2	2	2	2	4	2	2	2	4	2	4	2	2	4	4	2	2	2	4	2	0	0	1
861	39	2	2	2	3	1	2	3	1	4	4	4	4	4	2	2	4	2	1	2	2	2	3	3	2	2	2	2	3	2	4	3	2	2	4	4	4	2	2	4	4	2	2	4	3	4	1	1	1
862	52	2	2	2	2	1	4	2	1	4	4	4	4	4	4	2	2	2	1	2	2	2	2	2	2	2	4	2	2	2	4	4	4	2	4	4	4	2	2	4	4	2	2	2	2	4	0	0	0
863	53	1	2	2	2	2	2	3	1	4	4	4	4	4	2	2	2	3	1	3	3	3	2	4	2	2	3	3	3	3	3	3	3	3	3	2	2	2	3	3	3	3	3	3	1	3	1	1	1
864	31	1	3	1	3	2	4	3	1	5	5	5	5	5	2	2	2	4	1	4	5	5	5	5	3	5	5	1	2	1	5	1	1	2	5	1	4	1	1	4	4	2	2	4	2	4	1	1	0
865	28	1	2	1	2	1	2	3	1	4	5	3	4	4	2	2	2	2	1	3	2	3	2	4	2	2	4	2	3	2	4	3	2	2	2	3	3	2	3	3	3	2	3	2	2	3	2	1	2
866	35	1	3	2	3	1	2	1	1	4	4	4	4	4	4	1	5	2	1	5	5	5	5	5	1	1	3	2	3	2	3	3	4	3	2	2	4	4	4	3	2	4	4	4	5	3	0	1	0
867	30	2	3	1	2	1	3	2	1	5	4	4	4	4	1	1	1	1	1	1	4	1	4	3	1	1	3	2	3	2	4	1	1	1	3	2	3	1	2	3	3	2	1	2	1	3	1	1	0
868	24	1	3	1	2	1	2	2	1	4	4	4	4	4	3	2	2	2	2	2	2	2	2	2	3	1	3	5	3	2	5	3	2	2	4	2	4	2	2	3	3	2	2	4	2	3	1	1	1
869	32	1	3	2	3	1	2	3	1	3	4	4	5	4	3	3	4	4	3	3	3	2	3	3	2	2	4	2	3	1	3	1	2	3	2	2	1	2	2	3	4	2	1	4	2	4	0	1	0
870	25	2	3	1	3	2	2	2	1	3	3	3	3	3	3	3	3	2	2	2	2	4	4	4	2	1	2	3	1	2	3	3	4	4	2	4	2	2	3	2	2	2	2	3	4	4	1	1	1
871	28	2	3	2	2	1	3	2	1	4	4	4	4	4	4	3	3	3	3	3	4	4	4	4	2	2	3	4	4	3	3	3	3	3	3	3	3	3	4	3	3	3	4	4	4	4	0	1	1
872	24	1	3	1	2	1	2	2	1	4	4	4	4	4	2	3	3	3	1	2	3	3	3	3	2	2	3	3	4	3	4	3	3	3	3	1	3	1	1	1	1	2	3	3	3	3	1	1	1
873	38	2	3	2	3	1	4	3	1	3	3	3	3	3	3	3	3	2	3	3	3	3	3	3	3	3	3	3	3	3	3	3	3	3	3	3	3	3	3	3	3	3	3	3	3	3	1	1	2
874	32	1	3	3	2	1	2	2	1	4	4	4	4	4	2	2	2	2	1	2	2	2	2	4	2	1	3	2	3	1	5	2	2	2	3	2	1	1	2	1	2	2	2	1	2	4	0	1	1
875	38	2	2	2	2	1	2	2	1	4	4	3	4	4	2	2	2	2	1	2	2	2	2	4	2	2	3	2	3	2	3	2	2	1	2	2	3	2	2	3	3	1	2	3	2	3	0	1	1
876	28	1	3	2	4	2	3	2	1	4	4	4	4	4	4	4	4	4	4	3	4	4	4	4	4	4	1	2	2	2	2	1	2	2	2	2	1	2	2	2	2	2	2	2	2	2	2	1	1
877	25	1	3	1	2	1	2	2	1	4	4	4	4	4	2	2	3	2	1	2	2	2	3	4	2	2	3	2	2	2	4	4	2	3	3	2	2	3	2	4	3	2	2	3	2	3	0	1	0
878	27	1	3	2	2	1	2	2	1	2	3	4	3	3	4	2	1	4	1	2	2	2	4	4	2	2	1	2	2	1	4	2	2	2	4	2	4	2	2	4	4	2	2	4	2	4	1	0	0
879	23	1	3	1	3	2	2	2	1	4	5	4	4	4	2	2	2	3	2	2	2	2	3	3	2	1	4	2	3	1	4	4	2	4	4	2	4	2	2	2	3	2	2	1	2	4	1	0	1
880	41	1	2	2	2	1	3	2	1	3	3	3	3	3	3	1	2	3	3	3	3	3	3	3	1	1	4	1	3	1	5	1	1	3	3	2	3	2	2	3	3	2	2	3	2	3	1	2	2
881	41	1	2	2	3	1	3	2	1	4	4	4	4	4	4	4	3	3	3	4	4	1	4	3	1	1	5	1	5	1	5	1	1	1	5	1	5	1	1	5	5	1	1	5	5	5	2	2	2
882	43	1	2	2	3	1	3	2	1	3	3	3	3	2	3	3	3	2	2	2	2	3	3	3	2	2	3	2	2	2	3	3	3	4	3	4	3	2	2	3	4	2	5	5	5	5	2	3	3
883	53	2	1	2	1	1	3	1	1	5	5	4	5	5	1	1	1	2	1	2	4	2	2	2	2	2	4	2	2	2	4	2	2	2	4	2	3	1	2	3	4	2	2	3	2	3	0	0	0
884	35	1	1	1	3	1	3	2	1	1	1	1	1	1	1	1	4	1	1	1	1	3	4	1	1	1	1	1	1	1	1	2	1	2	1	1	1	1	1	1	2	2	1	1	1	2	0	0	0
885	38	1	3	2	4	2	4	1	1	5	5	4	5	5	3	3	3	3	1	2	3	3	3	2	2	2	3	3	3	2	4	2	3	3	3	3	3	2	2	3	5	2	3	3	3	3	0	1	1
886	54	1	1	2	3	1	3	1	1	4	4	4	3	5	2	2	4	2	2	4	3	3	2	2	2	2	4	1	1	1	4	1	1	1	4	1	1	1	1	1	1	1	1	4	1	1	0	0	0
887	50	1	2	2	3	1	4	2	1	3	4	3	4	3	4	5	3	2	3	3	3	2	3	5	3	2	3	5	4	3	3	3	3	3	3	5	5	4	5	5	5	4	5	4	3	3	2	2	3
888	50	1	1	2	4	1	3	2	1	4	4	4	4	4	2	2	3	4	2	4	2	3	4	4	2	2	3	2	2	1	3	2	2	4	4	2	4	2	2	3	3	3	2	4	2	4	1	1	0
889	35	1	3	2	4	2	4	2	1	5	5	4	5	5	1	1	1	1	1	1	1	1	4	1	3	5	5	1	5	1	5	1	1	5	5	1	5	1	1	5	5	1	1	3	1	5	0	0	0
890	57	1	3	2	3	1	4	2	1	4	4	2	4	4	2	2	2	2	1	3	2	3	4	3	2	2	4	2	4	2	4	4	3	3	3	3	3	2	3	3	3	3	3	3	3	3	0	1	1
891	47	1	2	2	4	2	4	2	1	4	4	4	4	4	2	2	2	2	1	1	2	3	2	4	1	1	4	4	2	2	4	2	2	2	2	1	4	2	2	1	4	2	2	1	2	4	1	1	1
892	48	1	1	3	3	1	4	1	1	4	4	4	4	4	1	1	1	2	1	2	2	2	2	2	3	1	3	2	3	2	4	4	3	4	4	2	3	4	4	4	4	1	4	4	3	3	0	0	0
893	49	1	3	2	3	2	3	2	1	4	5	4	4	4	2	2	2	2	2	2	2	4	4	4	2	1	2	3	1	2	3	3	4	4	2	4	2	2	3	2	2	2	2	3	4	3	1	1	1
894	54	1	2	1	3	1	3	2	1	1	1	1	1	1	3	3	4	2	1	3	3	3	5	2	2	2	3	1	3	1	3	2	1	3	3	1	3	1	3	4	3	1	1	3	2	3	1	1	0
895	39	2	1	2	2	1	4	2	1	3	3	3	3	4	2	3	2	2	1	2	2	2	3	3	2	2	3	2	2	2	4	2	2	2	3	3	3	2	2	2	3	2	2	2	3	3	1	1	0
896	38	1	1	1	2	1	3	1	1	5	5	3	5	4	4	5	4	5	1	4	5	3	4	4	3	4	5	1	1	1	1	1	1	1	1	1	1	1	1	1	1	1	1	1	1	1	0	1	0
897	32	1	3	2	3	2	3	2	1	4	4	4	4	4	2	3	4	2	2	3	3	2	3	3	3	1	3	2	3	2	4	2	2	4	4	4	2	2	2	3	3	2	2	3	2	3	1	1	1
898	34	1	2	2	3	1	4	1	1	2	4	4	2	4	2	2	2	2	1	2	2	2	2	2	2	2	4	1	4	2	4	4	2	1	4	2	2	2	1	1	1	1	1	2	1	1	0	0	0
899	39	1	2	2	4	1	4	2	1	3	4	3	2	3	3	3	4	3	3	3	3	2	3	3	2	2	4	2	4	2	4	3	3	4	3	2	2	2	2	3	4	2	3	2	3	2	2	1	1
900	43	1	2	2	3	1	4	2	1	5	4	4	4	4	3	3	3	3	3	3	3	5	5	1	1	1	2	2	2	2	2	2	2	2	2	4	4	2	2	2	2	2	2	2	2	2	0	1	1
901	36	1	2	2	3	1	2	2	1	4	5	5	4	5	2	2	2	2	1	2	3	4	4	3	2	2	3	1	5	1	5	1	1	5	5	1	5	1	5	5	5	1	1	5	1	1	0	0	0
902	41	1	1	2	3	1	2	1	1	3	3	3	3	3	2	2	2	3	2	3	3	3	3	3	2	2	2	2	2	2	3	3	3	2	3	3	3	2	2	2	3	3	2	2	5	4	1	1	3
903	37	1	1	2	2	1	4	1	1	4	5	5	5	4	2	2	2	4	1	5	2	2	4	4	2	2	3	1	1	2	5	4	3	4	4	3	4	2	4	4	5	2	2	2	3	4	1	1	1
904	46	1	1	1	3	1	4	2	1	3	4	2	4	4	4	4	4	2	1	3	4	4	4	4	2	2	3	2	2	2	4	4	5	4	4	4	4	5	5	5	5	4	4	4	4	4	1	1	0
905	42	1	1	3	3	1	3	2	1	4	3	4	3	3	2	4	3	2	1	3	3	3	3	4	3	2	3	2	2	4	3	3	3	4	2	4	2	3	4	3	2	2	3	3	4	2	1	1	2
906	32	1	3	2	4	1	4	2	1	4	4	4	4	3	1	1	2	2	1	2	3	3	3	3	2	2	3	3	3	3	3	3	3	3	3	3	3	3	3	3	3	3	3	3	3	3	1	1	1
907	21	1	2	2	2	1	3	2	1	3	4	3	3	2	2	3	3	2	1	3	5	3	3	5	1	1	2	1	3	1	2	1	2	2	1	2	2	2	2	1	3	3	2	4	4	2	3	3	0
908	39	1	1	1	2	1	1	2	1	4	4	3	4	4	2	2	2	2	1	4	2	3	3	2	2	2	3	2	3	2	3	4	4	2	4	4	2	2	3	2	4	3	3	2	4	4	1	1	1
909	43	1	2	2	2	1	4	2	1	4	4	3	4	3	1	3	4	1	3	3	4	4	3	3	1	4	1	1	1	1	1	1	1	1	1	1	3	1	1	1	3	1	1	1	3	1	0	0	0
910	46	1	1	2	3	2	4	1	1	3	4	3	3	3	3	3	3	2	3	3	3	4	3	1	1	1	3	3	3	1	3	1	1	1	1	1	1	1	1	1	1	1	1	1	1	1	0	0	0
911	33	1	3	1	3	2	3	2	1	4	4	4	4	4	2	2	4	4	1	4	4	2	2	4	2	2	3	3	3	3	4	4	3	3	3	3	3	3	3	3	3	3	4	4	4	4	1	1	1
912	52	1	1	2	3	1	4	1	1	5	5	4	5	5	5	5	1	5	5	5	5	1	5	5	3	5	3	3	3	3	1	1	1	1	1	4	4	4	4	3	4	2	3	4	2	4	0	0	0
913	50	1	2	2	2	1	3	2	1	4	4	4	4	4	1	1	1	1	1	1	3	1	4	3	1	1	4	1	4	2	4	1	1	1	1	1	4	1	1	1	4	1	1	4	3	4	1	1	0
914	38	1	1	2	3	1	3	1	1	3	4	3	4	3	2	1	1	1	1	1	1	1	4	1	1	1	1	1	1	1	1	1	1	1	1	1	2	1	1	1	1	1	1	1	1	1	0	0	0
915	43	1	3	2	3	1	4	2	1	3	4	3	3	3	2	2	2	2	2	3	4	2	2	4	2	2	3	2	3	2	3	3	2	2	3	2	3	3	2	2	3	2	2	2	2	3	0	0	0
916	39	1	2	3	3	1	3	2	1	4	4	4	4	4	3	3	3	3	3	3	3	3	3	3	1	3	3	3	3	3	3	3	3	3	3	3	3	3	3	3	3	3	3	3	3	3	2	2	2
917	56	1	3	3	4	2	1	2	1	3	4	3	3	4	3	3	3	2	1	3	4	4	4	4	1	1	3	2	3	2	3	2	2	1	3	3	2	3	1	3	3	2	2	2	2	3	1	0	1
918	40	1	2	2	2	2	2	3	1	5	5	4	5	3	2	3	1	1	1	4	1	3	4	2	3	1	5	1	5	1	5	1	1	1	5	1	5	1	1	5	5	1	1	5	1	5	0	0	0
919	33	1	2	2	4	1	3	1	1	5	5	4	5	5	4	5	4	4	4	4	3	3	3	4	3	2	4	4	2	2	3	3	2	2	3	2	3	2	2	3	3	2	2	2	2	2	1	1	1
920	35	2	3	2	2	1	3	2	1	4	4	4	4	4	2	2	2	4	1	3	3	2	2	4	1	4	4	4	4	4	4	4	3	3	3	3	4	1	2	2	3	3	3	3	3	3	0	0	0
921	50	1	1	2	3	1	4	5	1	4	4	4	4	4	2	2	2	4	1	2	2	2	2	2	2	2	4	2	4	2	4	2	2	2	4	4	4	2	2	2	4	2	2	4	2	3	0	0	0
922	26	1	2	1	3	1	2	5	1	3	4	3	3	3	3	3	4	3	1	2	2	2	2	4	2	1	1	2	3	2	4	2	2	2	4	2	1	2	2	3	4	2	2	2	2	2	1	1	0
923	38	1	1	1	3	1	4	5	1	4	4	3	4	4	2	2	2	2	1	2	2	2	3	3	2	1	4	1	3	1	3	3	3	3	3	3	3	1	3	3	3	3	2	3	3	3	1	1	1
924	44	1	1	2	4	1	4	5	1	4	5	4	4	4	2	2	2	4	1	3	3	2	2	4	2	1	1	1	1	1	1	1	1	1	1	1	1	1	1	1	1	1	1	1	1	1	0	0	0
925	52	1	1	3	3	1	4	5	1	5	5	4	5	5	2	2	2	2	1	1	1	1	5	2	3	5	4	1	1	1	2	2	2	2	4	1	4	1	1	4	5	1	1	1	1	4	0	0	0
926	43	1	1	2	4	1	4	5	1	4	4	4	4	4	2	2	2	2	1	2	2	2	2	2	2	2	4	2	2	2	2	4	2	2	2	2	3	2	2	2	4	2	2	2	2	2	0	1	1
927	41	1	1	2	3	1	1	5	1	5	5	4	4	4	2	2	2	3	1	3	2	1	2	2	2	2	4	2	4	1	4	2	2	4	4	4	4	2	1	3	3	1	1	3	2	4	1	0	1
928	36	2	2	2	2	1	2	4	1	3	4	3	3	3	3	3	3	2	3	3	3	3	3	3	3	3	1	1	1	1	1	1	1	1	1	1	1	1	1	1	1	1	1	1	1	1	2	2	1
929	49	1	2	2	3	1	3	5	1	4	5	5	5	5	1	2	1	2	1	4	4	2	2	4	2	2	3	2	2	1	3	3	3	2	2	3	4	2	2	3	4	3	2	3	3	3	0	0	0
930	38	1	1	3	3	1	2	5	1	3	3	3	3	3	4	3	3	4	1	2	3	3	3	3	3	3	4	3	3	3	3	3	3	3	3	2	2	2	3	3	3	3	2	3	3	3	1	1	1
931	52	1	2	2	3	1	4	5	1	4	4	4	4	4	3	3	3	3	1	3	3	3	3	3	2	2	3	2	3	2	4	3	2	2	3	2	3	2	2	3	3	2	2	3	2	3	1	1	1
932	42	1	2	2	4	1	3	5	1	4	5	5	4	4	1	2	1	2	2	3	5	3	2	4	1	1	3	3	3	3	3	3	4	3	3	4	3	3	3	3	3	2	3	3	2	3	1	1	1
933	50	1	1	2	2	1	4	5	1	5	4	4	4	4	2	2	2	4	3	3	4	3	3	3	2	2	3	3	3	3	4	3	3	4	4	1	4	1	3	3	3	3	1	3	3	3	1	1	1
934	47	1	1	2	3	1	3	5	1	3	3	3	3	3	3	3	3	2	3	3	3	3	3	3	3	3	3	3	3	3	3	3	3	3	3	3	3	3	3	3	3	3	3	3	3	3	1	1	1
935	35	2	1	3	2	2	2	5	1	4	4	3	4	4	2	3	3	2	1	3	4	4	4	4	2	2	3	3	3	3	3	3	3	3	3	3	3	3	3	3	3	3	3	3	3	3	1	1	1
936	36	2	1	3	2	1	1	5	1	4	4	3	3	4	2	3	2	2	2	3	2	2	3	3	2	2	2	2	2	2	3	2	2	2	2	3	3	2	2	3	3	3	3	3	3	3	0	1	1
937	23	2	2	1	2	2	2	3	1	3	3	3	3	3	3	3	4	4	4	4	4	4	4	4	4	4	4	2	3	2	3	2	2	3	3	2	3	2	2	3	3	2	2	3	3	3	1	1	0
938	38	2	1	3	2	1	2	2	1	4	4	4	4	4	2	2	2	4	2	4	5	2	2	4	2	2	4	1	4	1	4	2	2	4	4	4	4	2	2	4	4	4	4	4	4	4	0	0	0
939	45	2	1	2	2	1	3	3	1	4	4	4	4	4	4	2	2	4	2	4	2	2	2	4	2	2	4	4	4	2	4	2	2	4	4	4	4	2	2	4	4	4	4	4	4	4	0	0	0
940	39	2	2	2	2	1	3	3	1	4	5	4	4	4	1	3	4	2	1	3	3	3	4	4	1	1	2	2	4	2	3	4	3	2	3	3	3	3	4	2	4	4	3	2	3	3	0	1	1
941	44	2	1	2	3	1	2	5	1	4	4	4	4	4	2	2	2	2	2	2	2	2	2	2	2	2	4	2	2	2	4	4	2	4	4	2	3	2	4	2	4	4	2	4	2	4	1	1	1
942	38	1	2	3	3	1	2	5	1	4	4	3	3	4	4	4	3	2	1	3	2	2	2	4	2	2	3	3	3	3	3	3	3	3	3	3	3	3	3	3	3	3	3	3	3	3	1	1	1
943	60	1	2	2	3	1	4	5	1	5	5	4	5	3	4	5	3	3	4	2	3	3	4	3	3	3	1	1	1	1	1	3	2	4	2	4	2	4	2	3	2	4	3	2	3	4	1	2	1
944	34	1	1	2	2	1	4	5	1	4	4	4	4	3	4	3	3	3	3	4	4	3	3	3	1	2	3	3	2	3	3	3	3	3	3	3	3	3	3	3	3	3	3	3	3	3	1	1	1
945	43	1	1	2	3	1	4	5	1	4	4	3	4	3	2	2	2	2	1	4	4	3	3	4	2	2	3	2	2	1	3	4	3	4	3	3	4	2	2	3	4	3	2	3	3	3	1	1	1
946	50	1	1	2	3	1	4	1	1	5	5	2	5	4	2	1	1	4	1	4	2	1	4	5	3	2	5	4	4	1	5	3	1	3	3	1	4	1	3	3	3	3	1	1	2	5	1	1	1
947	46	1	1	3	3	1	2	5	1	4	4	4	4	4	2	4	2	4	1	2	2	2	2	4	1	2	4	1	3	1	4	2	1	2	4	2	4	2	2	2	3	2	2	2	2	4	0	1	1
948	51	1	1	2	3	1	3	5	1	4	4	4	4	4	3	3	3	3	1	3	3	3	3	4	2	3	3	2	3	2	4	3	2	3	3	2	2	2	2	2	3	2	3	3	2	3	1	1	1
949	41	2	1	2	1	1	4	5	1	4	4	4	4	4	2	2	2	2	1	2	3	3	3	4	1	1	3	2	3	2	3	2	3	3	3	3	3	2	4	4	3	3	3	3	3	3	1	1	1
950	31	1	1	2	3	1	2	5	1	3	3	3	3	3	3	3	3	2	3	3	3	3	3	3	3	3	3	3	3	3	3	3	3	3	3	3	3	3	3	3	3	3	3	3	3	3	1	1	1
951	39	1	2	2	3	1	4	5	1	4	3	2	3	4	2	2	2	2	1	2	2	2	4	4	2	2	4	4	4	2	4	3	2	4	4	2	2	2	2	3	4	2	2	2	1	3	1	1	1
952	47	1	1	2	3	1	4	5	1	5	5	4	5	5	4	4	5	5	1	5	5	5	5	5	3	5	4	2	4	1	4	1	1	1	1	1	1	2	1	4	4	1	2	1	2	1	0	0	0
953	45	1	1	2	3	1	4	5	1	4	4	4	4	4	3	3	4	3	2	3	5	3	3	4	2	2	4	2	2	2	5	3	4	4	4	4	4	1	4	4	4	4	2	3	4	5	1	1	1
954	49	1	1	2	3	1	3	5	1	4	3	3	3	3	3	3	4	3	3	3	3	3	3	2	3	1	4	2	1	2	3	3	3	3	3	3	3	3	3	3	3	3	1	1	2	2	1	1	0
955	38	1	1	1	3	1	4	5	1	3	4	4	4	4	4	4	4	4	4	3	4	4	4	4	4	4	4	4	4	4	4	4	4	4	4	4	4	4	4	4	4	4	4	4	4	4	0	0	0
956	57	1	2	2	3	1	3	5	1	3	3	3	3	4	3	3	3	2	3	3	3	3	3	3	2	2	3	2	2	3	4	2	2	2	3	3	3	2	3	2	4	4	3	3	3	3	1	1	1
957	44	1	1	2	3	1	4	5	1	4	5	4	3	5	4	1	5	2	1	4	4	3	4	1	2	2	4	2	3	2	4	3	2	2	3	2	4	2	3	4	4	2	2	3	3	2	1	1	1
958	52	1	2	3	1	1	1	4	1	4	4	2	3	3	4	2	2	2	1	3	2	3	4	4	2	2	3	2	2	2	3	2	3	3	2	2	3	2	2	4	4	4	2	2	2	2	1	1	1
959	46	1	1	2	1	1	1	5	1	3	3	3	3	3	3	3	3	2	1	2	2	2	2	4	2	2	3	2	3	2	4	3	3	3	3	3	3	2	3	2	3	2	3	2	2	3	0	1	1
960	49	1	1	3	3	1	4	5	1	3	3	3	3	3	1	1	2	2	2	3	5	2	3	3	2	1	3	3	3	2	3	3	3	3	3	3	3	2	2	3	3	3	3	3	2	3	1	1	1
961	23	1	3	1	3	1	2	5	1	4	4	4	3	4	2	4	4	2	1	4	2	2	3	4	4	3	3	2	2	3	3	3	2	4	2	2	2	2	3	2	3	2	2	3	2	2	1	1	1
962	39	2	1	2	2	1	3	3	1	3	3	3	3	4	3	3	3	2	5	3	3	3	4	3	2	2	3	2	2	3	4	2	2	3	3	2	3	2	2	3	3	3	2	4	3	4	1	1	1
963	21	2	2	1	2	1	2	3	1	3	3	3	3	3	4	3	3	3	3	1	4	3	3	3	1	2	1	4	3	3	4	4	4	4	4	3	3	3	4	3	4	2	4	2	4	4	0	1	0
964	39	1	1	2	3	2	4	5	1	4	4	4	4	4	4	3	2	4	3	4	2	2	4	2	2	2	3	3	3	3	3	3	4	2	2	2	3	4	3	3	2	3	2	2	3	2	1	1	1
965	52	1	1	2	2	1	3	5	1	3	3	3	3	3	3	3	3	2	3	3	3	3	3	3	2	1	4	2	4	3	4	3	3	4	4	4	3	4	3	3	3	2	3	3	3	2	1	1	1
966	37	1	2	2	3	1	2	4	1	3	5	3	3	3	3	3	3	3	2	2	3	3	3	2	3	2	3	2	3	2	3	4	4	4	4	2	4	2	2	2	4	2	2	4	4	4	1	1	1
967	52	1	2	2	3	1	4	5	1	4	4	4	4	4	4	4	4	4	4	3	4	4	4	4	4	4	3	4	2	2	3	3	3	3	3	2	3	3	3	3	3	3	2	2	3	3	1	1	1
968	46	1	1	2	3	1	1	5	1	4	4	4	4	4	2	2	2	4	2	4	4	3	4	4	3	3	4	2	1	2	4	3	3	2	4	2	4	2	2	4	4	2	2	2	3	4	0	0	0
969	39	1	2	2	3	1	2	5	1	5	5	4	5	3	3	3	3	3	3	3	3	3	3	3	1	3	3	3	3	3	3	3	3	3	3	3	3	3	3	3	3	3	3	3	3	3	0	0	0
970	44	2	2	2	2	1	4	2	1	4	4	4	5	4	4	3	2	3	2	3	3	3	3	3	2	2	4	2	3	2	4	2	2	3	4	2	3	2	2	3	3	2	2	3	2	3	0	1	1
971	42	2	1	2	2	1	2	5	1	4	4	4	4	4	4	4	2	2	2	3	3	3	2	4	2	2	4	2	4	2	4	2	2	2	4	2	3	2	2	4	4	2	2	2	3	4	1	0	0
972	36	1	2	1	3	1	2	5	1	1	4	4	2	4	2	4	4	2	2	4	4	2	4	4	2	2	5	2	4	2	4	2	5	1	4	4	2	4	3	4	4	2	2	4	4	2	1	1	1
973	32	2	1	2	2	1	3	2	1	4	4	4	4	4	3	3	3	2	1	4	3	3	4	4	2	2	4	3	2	2	4	5	3	3	3	2	4	3	3	3	4	2	3	4	3	4	1	1	1
974	31	2	2	3	2	1	2	3	1	3	3	3	3	3	4	2	2	2	1	4	3	5	3	1	1	1	3	2	3	2	3	3	2	2	2	2	2	4	2	4	4	2	2	4	4	2	1	1	2
975	36	1	1	2	2	1	4	5	1	4	4	4	4	4	2	2	2	2	2	2	2	2	2	2	2	2	4	2	2	2	4	2	2	2	4	2	2	2	2	4	4	2	2	4	2	4	1	1	0
976	50	1	1	2	2	1	4	3	1	5	5	4	5	5	2	2	2	2	1	5	3	2	3	4	2	1	4	2	3	2	3	3	3	2	3	2	3	2	3	2	3	2	2	2	2	3	1	1	0
977	29	2	2	2	2	1	2	3	1	4	4	4	4	4	4	4	4	4	4	3	4	2	4	4	3	4	4	4	3	4	3	2	3	4	3	4	4	3	4	2	2	2	2	4	3	4	1	2	1
978	46	1	2	3	3	1	3	1	1	3	3	3	3	3	4	2	3	2	1	3	3	4	4	5	3	3	4	1	2	1	5	2	3	4	4	2	3	1	2	3	3	2	3	3	2	5	1	1	1
979	23	1	1	2	2	1	2	5	1	4	4	4	4	4	2	2	2	2	2	4	4	3	2	3	1	2	4	1	3	1	5	1	1	3	5	1	5	1	1	5	5	1	1	5	5	5	0	1	0
980	30	1	1	1	3	1	2	3	1	2	4	4	4	4	1	4	1	4	1	1	1	1	3	1	4	4	5	1	5	1	5	1	3	5	5	5	5	1	1	5	5	1	1	5	5	5	0	0	0
981	29	1	2	2	3	1	3	4	1	2	4	4	4	4	2	2	2	4	1	4	3	3	4	3	2	1	3	3	2	1	4	2	3	2	4	2	4	2	2	4	4	2	2	2	3	4	1	1	1
982	31	1	2	3	3	1	3	5	1	3	3	3	3	3	4	1	1	1	1	1	1	1	4	1	1	1	5	1	3	2	5	1	1	2	5	2	4	2	2	3	3	2	2	2	2	4	0	1	1
983	39	1	2	2	3	1	2	4	1	3	3	4	4	3	4	2	4	2	1	4	4	4	4	4	3	3	3	2	5	1	4	4	4	2	4	2	3	1	1	4	4	4	3	4	4	3	1	2	2
984	50	1	1	2	2	1	1	2	1	2	4	4	4	4	2	2	3	3	2	3	3	4	4	3	2	3	3	3	4	3	4	3	3	3	4	3	4	3	2	3	4	3	2	4	3	4	1	1	1
985	31	1	1	1	3	1	3	4	1	3	3	4	3	3	3	3	3	3	3	3	3	4	4	3	1	4	1	1	1	2	2	1	2	2	2	2	2	2	1	1	1	1	1	1	1	1	1	1	1
986	40	2	1	2	2	2	3	3	1	5	5	3	3	3	3	2	2	2	1	2	2	2	2	4	2	1	4	2	4	2	4	1	3	3	3	2	4	2	1	4	4	2	2	2	3	5	1	1	0
987	29	1	1	1	4	1	1	4	1	1	4	4	4	4	2	2	2	2	1	4	4	1	2	4	2	2	2	2	2	1	3	2	4	2	4	4	2	2	3	2	4	3	3	2	3	2	1	1	1
988	43	2	1	2	2	1	3	5	1	3	3	3	3	3	2	3	2	2	1	3	3	3	3	3	2	1	4	3	3	2	4	3	3	3	3	2	3	2	2	3	3	2	3	3	3	3	1	1	1
989	47	2	1	2	2	1	3	4	1	3	4	4	3	4	3	3	4	4	3	4	4	4	4	4	4	4	3	3	3	3	1	3	1	2	3	1	3	2	3	3	2	3	2	1	2	2	1	1	1
990	47	2	1	2	3	1	3	2	1	4	4	4	4	4	2	4	3	2	1	5	5	2	4	3	2	2	3	2	1	3	3	5	1	3	3	3	3	5	3	4	5	3	4	4	1	2	1	1	1
991	25	2	2	2	3	1	1	5	1	3	4	4	4	3	2	3	3	3	1	3	3	3	3	3	3	3	4	2	2	2	4	2	2	2	4	4	4	2	2	3	3	3	2	3	3	3	0	1	1
992	30	1	2	2	2	1	3	3	1	1	4	2	3	4	1	1	4	2	2	2	3	1	3	4	2	1	2	1	2	1	3	4	2	2	2	2	2	1	2	2	1	1	2	1	3	4	1	0	0
993	26	1	2	1	2	1	2	3	1	2	4	4	4	4	4	4	4	4	4	3	3	3	4	4	3	4	2	2	2	2	2	2	2	2	2	2	2	2	2	2	2	2	2	2	2	2	1	1	0
994	39	1	1	1	2	2	4	4	1	1	4	4	4	4	4	4	4	4	4	3	4	4	4	4	4	4	2	2	2	2	2	2	2	2	2	2	2	2	2	2	2	2	2	2	2	2	0	0	0
995	27	1	2	1	2	1	2	3	1	5	5	4	5	5	5	2	2	2	2	2	5	2	5	5	3	5	5	1	5	1	4	2	2	4	5	1	4	2	1	4	4	2	2	2	2	4	0	0	0
996	28	1	3	1	4	2	3	4	1	4	4	4	4	4	2	3	4	2	2	3	3	3	4	4	2	2	4	2	3	2	4	2	2	4	4	2	4	2	2	4	4	2	4	2	4	4	1	1	1
997	37	1	3	2	3	2	3	2	1	3	3	3	3	3	3	3	3	2	1	3	3	3	3	3	3	3	3	2	3	2	3	3	1	2	3	3	1	1	2	3	3	2	2	1	3	3	1	1	1
998	33	2	2	2	2	1	2	2	1	4	4	4	4	4	2	2	2	2	1	2	2	2	2	2	2	2	3	2	2	2	4	2	2	2	3	2	3	3	2	3	3	2	2	3	3	3	1	1	1
999	35	2	2	2	3	1	1	3	1	3	4	3	3	4	3	3	4	3	3	3	4	1	3	3	3	2	3	3	3	3	3	3	3	3	3	3	3	3	3	3	3	3	3	3	3	3	1	3	3
1000	24	1	3	1	3	2	1	3	1	4	4	4	4	4	2	3	4	2	1	2	3	3	4	5	2	2	3	1	4	1	4	4	4	3	4	3	2	1	1	3	4	2	2	4	4	4	1	1	0
1001	41	1	1	2	2	1	2	5	1	5	4	4	4	4	4	4	4	4	4	3	4	1	3	4	4	4	3	3	3	3	3	3	3	3	3	3	3	3	3	3	3	3	3	3	3	3	1	1	1
1002	31	1	1	2	3	2	2	5	1	5	4	4	4	4	2	3	3	2	1	2	3	3	4	5	2	1	3	2	3	2	3	2	3	3	3	2	3	2	2	3	4	2	2	3	2	3	1	1	0
1003	41	1	1	2	2	1	1	2	1	5	5	4	5	5	5	5	5	5	5	5	5	5	5	5	3	5	5	5	5	1	5	1	5	5	5	5	5	5	5	5	5	5	5	5	5	5	0	0	0
1004	30	1	1	2	3	1	2	5	1	5	5	4	5	5	1	3	2	2	1	4	2	2	3	3	2	3	3	2	2	1	4	3	2	3	3	2	4	2	2	3	3	2	2	4	1	3	1	1	1
1005	29	1	2	2	2	1	1	4	1	4	4	4	4	5	2	3	2	4	1	4	3	2	4	4	2	2	4	4	2	1	4	4	5	2	2	4	2	4	4	4	4	4	5	2	4	5	0	1	1
1006	39	1	1	2	2	1	2	2	1	3	3	3	3	4	3	3	3	2	1	2	2	2	2	2	3	1	3	2	3	2	3	2	3	3	3	3	3	2	3	2	3	3	3	2	3	2	1	1	1
1007	32	1	3	2	2	1	3	2	1	4	4	4	4	4	2	2	2	2	1	3	2	2	2	4	2	4	4	1	4	1	4	1	1	1	4	1	4	1	1	4	4	1	1	4	1	1	0	0	0
1008	39	2	1	2	2	1	3	2	1	4	4	4	4	3	3	3	3	2	1	3	2	2	2	4	1	3	4	4	4	4	4	4	4	4	4	4	4	4	4	4	4	4	4	4	4	4	3	1	1
1009	34	1	3	2	2	1	1	3	1	5	5	1	5	4	1	1	4	4	1	3	1	3	2	4	1	1	4	1	4	1	4	1	1	1	4	4	4	1	1	3	4	1	1	1	1	1	0	0	0
1010	31	2	2	1	2	1	2	5	1	4	4	4	4	4	2	2	2	2	1	2	2	2	3	3	1	1	4	2	4	2	4	3	2	4	4	4	4	4	2	4	4	2	2	4	4	2	1	1	1
1011	25	1	1	1	2	1	3	5	1	3	4	3	2	4	4	2	3	4	2	3	5	4	4	3	3	5	3	5	3	4	3	5	3	5	2	5	3	5	3	5	1	3	1	4	2	5	2	3	1
1012	27	1	1	3	2	1	2	5	1	5	5	4	5	4	2	2	2	2	2	2	2	2	3	4	1	1	4	4	4	4	4	4	4	4	4	4	4	4	4	4	4	4	4	4	4	4	2	1	1
1013	55	1	1	1	2	1	3	3	1	5	5	4	5	5	5	5	5	5	5	5	5	1	5	5	1	2	3	2	2	2	2	2	2	2	3	2	3	2	2	3	3	3	3	2	2	3	0	0	0
1014	49	1	1	2	2	1	3	2	1	4	4	4	4	4	4	4	4	2	1	4	4	4	4	4	3	4	2	4	2	2	4	4	4	4	4	4	4	4	4	4	4	4	4	4	4	4	1	1	1
1015	34	1	2	2	3	1	4	5	1	4	4	4	4	4	4	4	4	4	4	3	4	4	4	4	4	4	4	4	4	4	4	4	4	4	4	4	4	4	4	4	4	4	4	4	4	4	1	1	1
1016	45	2	2	2	2	1	2	2	1	4	4	4	4	4	4	4	4	4	4	3	4	3	4	3	2	2	3	3	2	1	3	3	3	3	3	3	2	2	3	3	3	3	3	3	3	3	2	2	1
1017	30	2	1	2	2	1	2	5	1	4	4	4	4	4	3	2	2	1	1	3	2	2	3	3	3	2	1	1	5	1	5	1	1	1	5	1	4	1	1	4	4	1	1	5	1	5	0	0	0
1018	32	1	2	1	2	1	2	5	1	4	4	4	4	4	4	4	4	4	4	3	4	4	4	4	4	4	4	4	4	4	4	4	4	4	4	4	4	4	4	4	4	4	4	4	4	4	1	1	1
1019	44	1	2	2	2	1	4	5	1	3	3	3	3	3	3	3	3	2	2	3	3	3	3	3	3	3	1	1	1	1	1	1	1	1	3	1	1	1	1	1	1	1	1	1	1	1	0	1	1
1020	39	1	2	1	2	1	2	5	1	3	3	3	3	3	3	3	3	2	3	3	3	3	3	3	3	3	3	3	3	3	3	3	3	3	3	3	3	3	3	3	3	3	3	3	3	3	1	1	1
1021	22	1	2	1	2	1	2	5	1	4	4	4	4	4	2	3	3	3	1	3	2	3	3	4	4	4	2	3	2	3	4	4	4	4	4	2	4	2	2	4	4	3	2	3	2	3	1	1	1
1022	33	1	2	2	2	1	2	2	1	4	4	4	4	4	2	2	2	2	1	2	2	2	2	2	2	2	5	2	4	5	5	2	5	2	5	2	1	2	2	5	5	2	2	4	2	5	0	0	0
1023	26	1	3	1	3	1	2	2	1	4	4	4	4	4	2	2	2	2	1	2	3	3	4	3	2	2	3	2	3	2	3	2	2	2	3	2	3	2	2	3	3	2	3	3	3	2	0	1	1
1024	27	1	1	2	2	2	2	5	1	1	1	1	1	1	2	1	4	2	2	4	2	2	2	4	2	4	3	2	2	2	3	3	3	2	3	2	2	1	2	3	3	2	2	3	2	3	1	1	2
1025	33	2	1	2	2	1	2	5	1	3	3	3	3	3	3	3	3	2	1	3	3	3	3	3	1	1	3	1	3	4	4	4	4	4	4	4	4	2	2	4	4	4	2	4	1	4	3	3	3
1026	37	2	3	2	2	1	2	1	1	4	4	4	4	3	3	3	3	2	2	4	3	3	3	2	2	2	3	2	3	2	3	3	2	3	3	2	3	2	2	3	3	2	2	3	3	3	1	1	1
1027	23	1	3	1	2	1	2	2	1	3	3	3	3	3	3	3	3	4	4	4	4	1	4	1	1	3	3	1	1	1	3	1	1	1	3	1	1	1	1	1	1	1	1	1	1	1	0	0	0
1028	29	1	2	2	2	1	3	3	1	4	4	4	4	4	1	1	1	1	1	1	1	1	4	1	1	1	3	4	4	4	4	4	4	4	4	4	4	4	1	1	1	1	1	1	1	1	0	0	0
1029	25	1	3	1	2	1	2	1	1	4	4	4	4	4	4	4	4	4	2	4	4	2	4	4	2	2	4	1	1	2	4	3	2	4	4	2	2	2	2	4	4	2	2	4	4	4	1	1	0
1030	27	1	3	1	2	2	2	2	1	4	4	3	4	4	4	4	4	2	1	1	2	3	3	1	4	4	4	2	2	2	3	2	2	2	3	2	3	2	2	3	3	2	2	3	3	2	1	1	1
1031	23	1	2	1	2	1	3	1	1	4	4	4	4	4	2	2	2	2	1	2	2	2	2	2	2	2	1	4	4	4	5	2	4	4	4	4	3	4	4	4	4	4	4	4	4	4	0	0	0
1032	34	1	3	2	3	1	3	2	1	4	4	4	4	4	4	4	3	3	3	3	4	4	4	3	2	1	4	4	4	3	4	4	4	4	5	4	4	2	2	4	4	3	4	4	4	4	2	2	1
1033	32	1	2	2	3	1	3	1	1	4	4	4	4	4	2	2	2	2	2	4	2	2	3	3	3	1	3	2	2	3	3	3	3	3	3	3	3	2	2	3	3	2	3	3	3	3	2	2	2
1034	31	1	3	2	2	1	2	2	1	4	4	4	4	4	2	2	2	2	1	2	2	2	2	2	3	1	4	2	2	2	3	2	2	2	3	3	3	3	2	3	3	3	2	3	3	3	0	1	1
1035	34	2	1	2	3	1	4	5	1	4	4	4	4	4	2	2	2	2	2	2	2	2	2	2	2	4	3	3	3	3	3	3	3	3	3	3	3	3	3	3	3	3	3	3	3	3	0	0	0
1036	31	2	1	2	3	1	3	5	1	5	5	4	5	5	2	2	4	3	1	5	1	1	3	1	3	1	3	2	3	2	3	3	3	3	3	3	3	2	1	4	3	2	1	3	1	3	1	1	1
1037	52	1	1	2	2	1	4	5	1	3	3	3	3	4	3	4	3	4	3	3	2	3	2	4	2	2	4	4	2	4	4	5	4	4	4	4	4	4	4	4	4	5	4	5	5	4	2	2	1
1038	47	2	2	2	2	1	3	5	1	5	5	4	5	5	2	2	2	5	1	2	5	2	5	2	1	1	5	1	5	1	5	5	5	5	5	1	4	5	2	4	5	4	2	4	5	4	0	0	0
1039	49	1	1	3	2	1	4	5	1	2	4	3	5	5	4	2	2	1	1	1	1	4	4	2	2	2	3	2	3	1	1	1	3	3	2	4	4	2	2	3	3	1	1	4	2	2	0	0	0
1040	52	2	1	2	2	1	3	5	1	1	1	3	3	1	4	2	3	3	1	3	3	3	3	2	3	1	3	3	2	3	3	3	3	3	2	5	3	3	2	3	3	3	3	3	3	3	1	1	1
1041	45	2	1	2	2	1	3	5	1	2	3	4	3	3	3	4	4	4	3	4	4	4	3	4	4	4	2	2	2	2	2	2	2	2	2	2	2	2	2	2	2	2	2	2	2	2	2	2	2
1042	35	1	1	1	3	1	3	5	1	4	3	4	4	3	4	4	4	3	4	3	4	4	3	4	4	3	4	2	3	2	5	4	2	3	4	2	4	2	2	4	3	2	2	2	3	2	2	1	2
1043	38	1	1	2	3	1	4	3	1	3	3	2	3	3	4	3	3	2	1	2	3	3	3	3	3	3	3	2	2	2	3	2	2	2	3	2	2	3	3	2	3	2	3	3	2	3	1	1	1
1044	24	1	1	1	3	1	2	5	1	4	5	4	4	3	3	3	3	4	1	4	4	4	4	5	3	3	4	1	1	1	4	1	1	1	1	1	4	1	1	4	3	1	1	3	1	1	1	1	1
1045	42	2	1	2	2	1	2	5	1	4	4	4	4	4	2	4	2	2	2	3	3	2	3	3	3	1	4	2	2	2	4	3	3	3	4	2	4	2	2	3	3	2	2	3	2	3	1	1	1
1046	23	2	1	2	2	2	2	3	1	5	5	4	5	5	2	2	4	4	2	2	2	2	3	3	3	2	4	2	3	1	5	2	2	2	4	2	4	4	4	4	4	4	4	4	4	4	1	1	1
1047	20	2	1	1	2	1	1	3	1	4	4	4	4	4	4	4	4	3	1	3	3	3	2	4	2	2	3	2	3	2	3	2	2	2	4	3	3	2	2	3	3	2	2	3	3	3	0	1	1
1048	38	1	2	2	3	1	2	4	1	4	4	4	4	4	4	4	4	4	4	3	4	4	4	4	4	4	5	5	1	1	5	1	3	2	4	2	4	5	5	4	4	1	5	4	5	2	2	2	2
1049	29	1	1	2	3	1	2	5	1	1	1	1	1	1	1	1	1	1	1	1	1	3	4	1	1	1	1	1	1	1	1	1	1	1	1	1	1	1	1	1	1	1	1	1	1	1	0	0	0
1050	40	1	1	2	3	1	4	5	1	5	5	4	5	5	1	1	1	1	1	5	1	1	4	5	3	5	5	1	5	1	5	1	1	5	5	1	5	1	1	5	5	1	1	5	1	5	0	0	0
1051	36	1	3	3	3	2	4	2	1	4	4	4	4	4	4	4	4	4	4	3	4	4	4	4	4	4	4	4	4	4	4	4	4	4	4	4	4	4	4	4	4	4	4	4	4	4	1	1	1
1052	38	1	3	1	3	2	4	2	1	3	3	3	3	3	3	3	3	2	2	3	3	3	3	3	3	3	1	1	1	1	1	1	1	1	3	1	1	1	1	1	1	1	1	1	1	1	0	1	1
1053	39	1	3	2	4	2	3	2	1	3	3	3	3	3	3	3	3	2	3	3	3	3	3	3	3	3	3	3	3	3	3	3	3	3	3	3	3	3	3	3	3	3	3	3	3	3	1	1	1
1054	35	2	2	2	2	1	4	3	1	5	5	4	5	5	2	2	4	3	1	5	1	3	3	1	3	1	3	2	3	2	3	3	3	3	3	3	3	2	1	4	3	2	1	3	1	3	1	1	1
1055	39	1	2	2	2	2	4	3	1	3	3	3	3	4	3	4	3	4	3	3	2	3	2	4	2	2	4	4	2	4	4	5	4	4	4	4	4	4	4	4	4	5	4	5	5	4	2	2	1
1056	28	2	1	2	2	1	1	3	1	5	5	4	5	5	2	2	2	5	1	2	5	2	5	2	1	1	5	1	5	1	5	5	5	5	5	1	4	5	2	4	5	4	2	4	5	4	0	0	0
1057	36	2	1	2	1	2	4	2	1	2	4	3	5	5	4	2	2	1	1	1	1	4	4	2	2	2	3	2	3	1	1	1	3	3	2	4	4	2	2	3	3	1	1	4	2	2	0	0	0
1058	32	2	1	3	2	2	4	2	1	1	1	3	3	1	4	2	3	3	1	3	3	3	3	2	3	1	3	3	2	3	3	3	3	3	2	5	3	3	2	3	3	3	3	3	3	3	1	1	1
1059	35	2	2	2	2	2	4	2	1	2	3	4	3	3	3	4	4	4	3	4	4	4	3	4	4	4	2	2	2	2	2	2	2	2	2	2	2	2	2	2	2	2	2	2	2	2	2	2	2
1060	22	2	2	2	2	2	4	2	1	4	3	4	4	3	4	4	4	3	4	3	4	4	3	4	4	3	4	2	3	2	5	4	2	3	4	2	4	2	2	4	3	2	2	2	3	2	2	1	2
1061	36	2	3	2	2	2	4	2	1	3	3	2	3	3	3	3	3	2	1	2	3	3	3	3	3	3	3	2	2	2	3	2	2	2	3	2	2	3	3	2	3	2	3	3	2	3	1	1	1
1062	35	2	2	2	2	2	4	2	1	4	5	4	4	3	3	3	3	4	1	4	4	4	4	5	3	3	4	1	1	1	4	1	1	1	1	1	4	1	1	4	3	1	1	3	1	1	1	1	1
1063	37	2	2	2	2	2	3	2	1	4	4	4	4	4	2	4	2	2	2	3	3	2	3	3	3	1	4	2	2	2	4	3	3	3	4	2	4	2	2	3	3	2	2	3	2	3	1	1	1
1064	37	2	3	2	2	2	2	2	1	5	5	4	5	5	2	2	4	4	2	2	2	2	3	3	3	2	4	2	3	1	5	2	2	2	4	2	4	4	4	4	4	4	4	4	4	4	1	1	1
1065	35	2	2	2	2	2	1	2	1	4	4	4	4	4	4	4	4	3	1	3	3	3	2	4	2	2	3	2	3	2	3	2	2	2	4	3	3	2	2	3	3	2	2	3	3	3	0	1	1
1066	35	2	1	2	2	2	4	3	1	4	4	4	4	4	4	4	4	4	4	4	4	4	4	4	4	4	5	5	1	1	5	1	3	2	4	2	4	5	5	4	4	1	5	4	5	2	2	2	2
1067	28	2	3	2	1	2	2	2	1	1	1	1	1	1	1	1	1	1	1	1	1	3	4	1	1	1	1	1	1	1	1	1	1	1	1	1	1	1	1	1	1	1	1	1	1	1	0	0	0
1068	35	2	3	2	2	2	4	2	1	5	5	4	5	5	1	1	1	1	1	5	1	1	4	5	3	5	5	1	5	1	5	1	1	5	5	1	5	1	1	5	5	1	1	5	1	5	0	0	0
1069	38	2	3	2	2	2	4	2	1	4	4	4	4	4	2	2	2	2	2	2	2	2	2	2	2	4	4	2	4	2	4	4	4	4	4	2	2	4	2	4	4	4	4	4	4	4	1	2	2
1070	36	2	3	2	2	2	4	2	1	4	4	4	4	4	2	4	4	2	1	2	2	2	2	2	2	2	2	2	2	2	2	2	2	2	2	2	2	2	2	2	2	2	2	2	2	2	0	0	0
1071	32	1	3	2	2	1	1	2	1	3	4	2	4	4	2	2	4	4	1	3	2	2	3	3	3	2	4	3	3	1	3	3	3	3	4	3	3	3	3	4	3	4	3	3	3	3	0	0	0
1072	40	2	2	2	1	2	1	3	1	4	5	5	4	5	2	2	2	2	1	3	3	3	3	3	3	2	4	2	5	2	5	2	1	4	5	1	4	1	2	4	5	1	2	4	4	4	1	1	0
1073	37	2	1	2	2	2	1	3	1	3	3	3	3	3	3	2	2	2	1	2	2	2	2	2	3	1	3	3	3	2	3	2	2	2	3	2	3	2	2	3	3	2	2	3	3	3	1	1	1
1074	38	2	2	2	2	2	2	3	1	2	1	2	3	3	1	2	2	1	1	2	3	1	4	1	2	2	3	4	1	2	4	3	5	3	4	2	3	2	2	3	3	3	3	4	4	4	1	1	1
1075	33	2	1	2	2	2	1	3	1	4	4	4	4	4	2	3	3	2	1	2	4	2	2	4	2	2	3	4	3	2	3	2	2	3	4	2	4	4	4	4	4	4	4	4	4	4	1	1	1
1076	32	2	1	2	2	2	4	3	1	3	3	3	3	5	2	2	2	1	1	3	2	2	2	4	2	2	5	2	4	2	5	2	2	4	5	2	5	2	2	4	4	2	2	4	2	5	0	0	0
1077	39	2	1	3	2	2	3	2	1	4	4	4	4	2	2	2	2	2	2	2	2	2	2	4	2	2	4	2	3	1	1	2	1	4	4	1	4	3	2	3	4	2	3	2	3	3	1	1	1
1078	34	2	1	2	1	1	4	3	1	4	4	4	4	4	3	2	2	2	2	2	3	3	4	4	2	2	4	2	4	2	4	2	2	2	3	2	2	3	3	3	3	3	3	3	3	3	1	1	1
1079	45	1	2	3	2	2	3	3	1	4	4	4	4	4	2	2	3	3	1	2	2	2	4	4	2	2	5	2	1	2	4	4	1	4	4	2	4	2	1	4	4	2	2	4	2	2	0	0	1
1080	20	1	2	1	2	2	1	3	1	4	5	4	4	5	2	2	2	2	1	2	2	2	2	2	2	2	3	2	3	2	3	2	2	2	4	2	3	2	2	4	4	2	2	3	3	3	1	1	0
1081	42	2	2	2	2	2	4	2	1	4	4	4	4	4	4	4	4	2	1	2	2	2	2	2	2	2	4	1	4	1	4	1	4	4	4	1	4	1	4	4	4	1	2	4	4	2	0	0	0
1082	46	2	1	2	1	2	4	1	1	4	4	4	4	4	2	2	2	4	1	3	2	1	4	1	4	4	4	2	4	2	4	2	2	2	4	2	4	2	2	3	4	2	2	2	2	4	0	0	1
1083	35	2	2	2	2	2	4	2	1	3	3	3	3	4	2	2	2	4	2	4	2	2	2	4	2	2	4	4	4	1	4	4	2	2	3	4	4	1	3	4	4	4	1	2	1	4	0	0	0
1084	31	2	2	2	1	2	4	1	1	5	5	4	4	4	3	2	2	2	1	2	3	2	2	1	2	2	4	2	4	4	4	2	2	4	4	4	4	4	2	2	2	2	2	2	2	2	1	1	1
1085	41	2	1	2	2	2	4	3	1	4	4	4	4	4	3	3	3	2	2	2	3	3	4	3	2	2	3	3	3	3	3	3	3	2	3	3	3	3	3	3	3	2	3	3	3	3	1	1	1
1086	36	1	3	2	2	2	2	2	1	4	4	4	4	3	5	3	3	2	1	1	4	2	4	5	3	1	4	3	2	2	4	4	3	4	4	2	3	4	3	3	4	4	2	4	2	3	0	1	2
1087	29	2	3	2	2	2	2	2	1	5	5	4	4	5	2	2	2	2	1	4	2	1	2	4	1	1	5	2	4	1	5	1	1	5	5	1	4	1	1	5	5	1	1	5	1	5	0	1	0
1088	37	1	3	2	4	2	2	2	1	5	5	4	4	5	1	2	2	2	1	4	2	1	2	4	1	1	5	1	4	1	5	1	1	5	5	1	4	1	1	5	5	1	1	5	1	5	0	1	0
1089	30	2	3	1	3	2	3	2	1	3	3	3	3	3	3	3	3	2	3	3	2	2	2	4	3	1	3	3	3	3	3	3	3	3	3	3	3	3	3	3	3	3	3	3	3	3	1	1	1
1090	22	2	3	1	1	2	1	2	1	3	4	4	4	4	4	4	4	4	4	3	4	3	4	3	2	2	3	2	1	1	4	4	4	1	3	4	4	1	1	1	2	2	3	3	3	3	1	0	0
1091	41	2	1	2	2	2	4	2	1	4	4	3	4	4	2	4	4	4	1	2	2	2	2	4	4	4	5	1	1	1	4	4	4	4	4	4	4	1	1	4	4	4	1	4	2	4	0	0	0
1092	34	1	2	2	4	2	3	2	1	3	3	3	3	3	3	3	3	2	1	3	3	3	5	3	2	2	3	3	3	3	3	3	3	3	3	4	4	2	3	3	3	3	3	3	4	4	2	1	1
1093	45	2	2	2	2	2	2	2	1	5	4	4	5	5	5	4	4	4	1	4	5	4	4	4	3	2	4	1	4	1	4	1	1	4	4	2	4	1	1	3	3	1	1	3	1	4	0	0	0
1094	31	2	3	1	2	2	1	2	1	3	4	1	4	3	4	4	5	4	5	5	5	4	4	5	1	2	4	4	4	4	5	4	4	4	4	4	4	3	4	3	4	4	5	4	4	4	3	2	3
1095	38	2	3	2	2	2	3	2	1	4	4	4	4	4	2	3	3	3	1	2	3	2	4	3	3	1	4	2	4	2	4	3	2	3	4	2	4	2	2	4	4	2	2	3	2	3	1	0	1
1096	51	1	3	2	4	2	4	2	1	3	4	3	3	4	3	3	4	3	1	3	2	1	3	3	2	2	4	2	3	3	3	3	3	3	3	3	3	3	3	3	3	3	3	3	3	3	1	1	0
1097	43	1	3	2	4	2	4	2	1	4	5	5	4	5	1	2	3	2	1	3	2	3	3	1	2	2	3	2	4	2	4	2	4	4	4	2	4	2	2	3	4	3	2	4	2	4	0	1	1
1098	48	2	2	2	3	2	4	2	1	3	3	3	3	4	2	2	2	2	1	2	2	2	4	4	2	2	3	2	2	1	3	2	2	2	1	1	1	1	1	1	1	1	1	1	1	1	0	0	0
1099	47	1	2	2	3	2	4	3	1	4	4	4	4	4	2	2	2	2	1	2	2	2	4	4	2	2	4	1	4	1	4	1	1	1	4	2	2	1	1	4	4	1	1	4	1	4	0	0	0
1100	31	2	2	2	2	2	3	2	1	2	4	3	4	4	4	2	2	3	2	2	2	2	2	4	2	2	4	2	2	2	5	2	2	2	2	2	4	2	1	5	5	5	1	5	5	5	1	1	1
1101	29	2	3	2	1	2	3	2	1	4	5	4	4	5	2	2	2	3	1	3	3	3	3	3	3	3	4	4	4	4	4	4	4	4	4	4	4	4	4	4	4	4	4	4	4	4	1	1	1
1102	41	2	2	2	2	2	4	2	1	4	4	4	4	4	1	3	2	2	1	3	3	3	2	4	3	3	4	1	3	2	4	2	2	4	4	2	4	2	2	2	4	2	2	3	2	4	0	0	0
1103	27	2	2	2	1	2	3	2	1	5	5	4	5	5	5	4	4	4	1	4	4	2	4	5	3	3	4	1	4	1	4	3	1	2	4	1	4	1	1	3	4	1	1	3	1	4	0	0	0
1104	35	2	1	2	1	2	1	2	1	3	4	2	4	4	4	2	2	2	1	3	2	1	2	2	2	3	4	4	3	2	3	2	2	3	3	3	3	2	2	4	4	4	3	3	3	3	1	1	0
1105	45	2	1	2	2	1	4	2	1	4	4	4	4	4	2	2	2	2	1	2	2	2	3	4	2	2	3	1	3	2	4	2	3	3	3	3	3	1	2	3	3	2	3	4	2	4	0	0	0
1106	33	2	1	1	1	2	3	3	1	4	4	4	4	4	2	4	4	2	4	2	2	2	2	4	2	2	2	2	2	2	4	4	2	2	2	4	4	2	4	2	4	2	2	2	2	2	1	1	1
1107	28	2	1	1	2	2	3	3	1	4	4	4	4	4	2	2	2	2	2	2	2	2	4	4	2	2	4	2	2	2	3	4	2	2	4	2	2	2	2	2	2	2	2	2	2	2	0	0	0
1108	31	2	1	2	2	2	3	3	1	2	3	2	2	2	4	2	2	2	1	4	2	2	2	4	2	4	2	2	2	2	3	3	4	4	2	3	2	3	1	2	5	1	1	5	5	5	1	1	0
1109	33	2	1	2	1	2	1	3	1	4	4	4	4	4	3	3	3	3	1	3	4	2	2	1	3	1	4	2	4	2	4	2	2	4	4	4	4	2	2	4	4	3	2	4	2	4	1	1	0
1110	41	2	1	2	1	2	4	3	1	4	5	4	4	4	2	2	2	2	1	3	3	3	3	3	2	1	3	2	3	2	3	3	2	4	3	2	2	2	2	3	4	2	2	4	4	3	1	0	2
1111	36	2	2	3	2	2	2	3	1	4	4	4	4	4	4	4	4	4	4	3	4	2	4	4	2	2	4	4	4	4	4	4	4	4	4	4	4	4	4	4	4	4	4	4	4	4	0	0	0
1112	36	1	3	1	2	2	1	3	1	5	4	4	4	5	3	2	2	2	2	2	2	2	3	3	3	1	4	2	2	1	4	1	1	1	1	1	1	1	1	3	3	1	1	1	1	1	0	0	0
1113	29	1	2	2	2	2	3	3	1	4	4	2	4	5	1	1	4	1	1	1	3	1	3	3	1	1	3	2	4	1	4	4	3	3	3	3	4	2	3	3	3	3	3	3	3	3	1	1	1
1114	25	2	2	1	2	2	1	2	1	5	4	3	3	4	2	2	3	3	1	2	2	2	3	3	2	2	4	2	4	2	5	2	2	2	4	2	3	2	3	4	4	2	2	4	2	4	1	1	0
1115	43	2	2	2	1	2	2	2	1	4	4	3	4	5	5	2	4	5	1	3	4	3	3	4	2	2	4	1	4	1	4	1	1	1	5	2	4	2	1	4	4	1	1	4	1	4	0	1	1
1116	28	2	2	2	1	2	3	2	1	4	4	4	4	4	2	2	2	2	1	2	2	2	4	4	2	4	5	1	5	2	5	4	1	4	4	4	4	4	1	4	4	2	2	4	1	4	0	0	0
1117	27	2	1	1	1	2	3	3	1	4	4	4	4	4	2	2	2	2	1	2	2	2	3	4	2	2	4	2	4	2	4	2	2	2	4	2	4	2	2	2	4	2	2	4	2	4	1	0	1
1118	32	1	2	2	2	2	3	3	1	4	4	4	4	4	2	2	3	2	1	1	1	1	2	1	4	4	4	3	3	2	2	3	3	3	3	3	3	3	3	3	3	3	3	3	3	3	0	0	0
1119	27	1	2	1	2	2	3	3	1	4	4	4	4	4	2	2	2	2	1	2	5	1	4	4	2	2	2	2	2	1	4	1	2	3	2	1	4	2	1	2	2	2	2	2	2	2	1	1	1
1120	47	1	1	1	2	2	4	3	1	4	4	4	4	4	2	2	2	2	2	2	2	2	2	2	2	2	2	2	4	2	4	2	4	2	4	4	4	2	4	4	4	4	2	2	4	4	1	1	1
1121	45	2	1	3	1	2	4	3	1	4	4	4	4	4	5	5	3	4	3	4	4	3	3	3	3	5	3	2	2	2	3	3	2	2	2	2	2	2	2	2	2	2	2	3	3	3	1	1	1
1122	36	2	1	2	2	2	3	3	1	4	4	4	4	4	2	2	2	3	1	2	2	2	3	3	2	2	4	2	2	2	4	4	2	4	4	2	4	2	4	2	4	4	2	2	2	4	1	1	1
1123	46	1	2	2	2	2	4	3	1	3	4	3	3	3	3	3	4	3	1	3	2	1	3	3	2	2	5	1	5	1	5	1	1	5	5	1	5	1	1	5	5	5	5	5	5	5	1	1	0
1124	29	2	1	2	2	1	1	2	1	4	4	4	4	4	2	2	2	2	1	2	5	1	4	4	2	2	5	1	1	1	5	2	2	2	4	2	4	2	2	2	4	4	2	2	2	2	1	1	1
1125	34	2	1	2	2	1	1	3	1	4	4	4	4	4	4	2	4	2	2	2	4	4	3	4	2	2	4	2	4	2	4	3	2	4	4	2	4	2	2	4	4	2	2	4	1	4	1	1	1
1126	53	1	1	2	2	1	1	3	1	5	5	4	4	4	2	2	4	2	1	2	2	2	2	4	1	3	4	2	2	2	3	2	2	2	3	2	3	2	2	2	3	2	2	2	2	3	0	0	0
1127	42	2	1	3	1	1	2	2	1	4	4	4	4	4	1	2	2	3	1	2	4	2	2	4	4	4	5	1	2	2	5	2	2	4	4	2	4	2	2	4	4	2	2	4	2	4	1	1	0
1128	46	2	1	2	1	1	2	2	1	1	4	4	4	4	4	4	4	4	4	3	4	4	4	4	4	4	1	1	1	1	1	1	1	1	1	1	1	1	1	1	1	1	1	1	1	1	0	0	0
1129	50	2	1	2	2	1	1	3	1	3	4	3	3	4	3	4	4	2	1	3	3	3	3	3	2	1	3	3	3	3	3	3	3	3	3	3	3	3	3	3	3	3	3	3	3	3	1	1	1
1130	47	2	1	1	3	1	1	3	1	3	4	3	3	4	3	4	4	4	4	4	4	4	4	4	4	4	2	2	2	2	2	2	2	2	2	2	2	2	2	2	2	2	2	2	2	2	1	1	0
1131	44	2	2	2	2	1	2	2	1	5	5	4	5	5	2	2	2	2	1	2	4	3	2	4	4	3	3	2	3	2	4	2	3	2	3	3	3	2	2	2	3	4	2	4	3	3	0	1	1
1132	41	1	1	1	2	1	4	2	1	4	4	4	4	4	3	4	4	2	1	2	1	1	4	1	3	1	3	1	2	1	5	3	1	5	5	2	3	2	1	3	5	2	1	5	1	5	0	1	1
1133	47	2	1	2	2	1	2	2	1	4	4	4	4	4	2	2	2	2	2	2	4	2	2	4	2	2	3	3	3	2	4	2	2	2	4	2	2	2	2	4	4	2	2	4	2	4	0	0	0
1134	45	2	1	3	2	1	2	2	1	3	3	3	3	4	2	1	2	2	1	2	2	4	4	4	1	1	5	3	3	3	3	3	3	3	3	3	3	3	3	3	3	3	3	3	3	3	1	1	1
1135	30	2	1	2	2	1	3	3	1	4	4	4	4	4	2	2	2	2	2	2	1	2	2	2	2	2	4	2	4	2	4	2	2	4	4	2	4	2	2	4	4	2	2	4	2	4	1	1	1
1136	36	2	1	2	2	1	3	2	1	3	4	3	3	3	3	2	4	2	1	2	3	3	3	3	2	2	4	2	4	2	4	4	4	2	2	2	4	2	4	4	4	2	2	4	4	4	1	1	1
1137	33	2	1	2	2	1	2	3	1	3	4	2	4	3	4	4	3	3	2	4	2	2	2	4	3	2	1	1	1	1	1	1	1	1	1	1	5	1	1	5	5	5	5	5	5	5	0	1	2
1138	34	2	1	3	2	1	2	2	1	4	5	4	5	5	4	2	4	2	3	2	4	4	3	4	4	4	1	2	2	3	2	2	3	3	3	2	3	2	3	3	2	3	3	3	3	2	1	2	1
1139	49	2	1	2	2	1	3	3	1	4	4	4	4	4	2	2	2	2	1	2	5	5	4	4	2	2	5	1	1	1	5	1	2	2	4	2	4	2	2	2	4	2	2	2	2	2	1	1	1
1140	45	2	1	2	1	1	1	2	1	3	4	3	3	4	3	3	4	3	1	3	3	3	3	3	2	2	4	2	3	2	4	2	2	4	4	2	4	2	2	4	4	2	2	4	2	3	0	0	1
1141	30	2	1	2	1	1	1	2	1	4	4	4	4	4	4	2	2	2	1	2	2	2	2	4	1	3	4	2	4	2	4	2	2	4	3	4	4	3	4	4	3	4	1	1	1	1	1	0	0
1142	30	2	1	2	2	1	3	2	1	4	4	4	4	4	2	4	2	2	1	2	2	2	2	4	2	4	4	2	3	2	4	1	1	1	4	1	4	1	1	4	4	1	1	4	1	3	0	1	0
1143	31	2	2	2	2	1	1	1	1	5	5	4	5	5	5	1	1	1	1	1	1	1	4	1	1	1	5	1	1	1	5	1	1	3	5	1	5	5	1	5	5	1	1	3	1	1	0	0	0
1144	34	2	1	2	1	1	2	2	1	5	4	4	4	3	2	2	2	3	1	2	2	2	3	3	2	1	4	3	4	2	4	4	3	4	4	2	3	3	2	3	3	2	2	4	4	4	0	0	0
1145	37	2	1	2	1	1	3	1	1	3	4	3	4	4	2	3	3	3	1	3	3	3	3	4	2	2	3	1	2	2	5	3	3	3	4	3	3	2	2	4	4	2	2	4	3	3	1	1	1
1146	24	1	1	1	1	1	1	2	1	5	4	4	4	3	2	2	2	2	2	3	2	2	2	4	2	4	5	2	1	1	3	1	1	1	3	1	3	1	1	3	3	1	1	1	1	1	0	0	1
1147	37	1	1	1	2	1	1	1	1	5	4	1	4	4	3	2	2	2	1	2	2	3	3	3	2	2	4	2	4	2	4	2	2	2	4	2	4	2	2	4	4	1	2	4	1	3	1	1	0
1148	25	2	1	2	1	1	1	2	1	3	3	3	3	5	3	5	4	3	5	3	3	5	4	5	3	4	3	4	3	4	3	3	4	3	5	4	4	4	3	4	4	4	5	4	4	4	2	3	2
1149	29	2	1	2	1	1	1	2	1	3	4	3	4	4	4	4	3	4	4	3	3	3	2	4	1	4	2	2	3	2	2	4	2	3	3	2	3	3	2	2	3	2	2	2	3	3	1	1	2
1150	19	2	1	1	1	1	1	2	1	4	5	4	4	4	1	2	2	4	1	2	2	2	2	2	2	2	5	1	5	1	5	1	1	5	5	1	5	1	1	5	5	5	1	5	5	5	0	0	0
1151	33	2	1	1	2	1	4	2	1	3	3	3	3	3	2	2	2	2	2	3	3	2	3	3	2	2	2	3	2	2	3	4	2	4	2	4	2	2	3	2	3	2	3	3	3	2	0	1	1
1152	32	2	1	2	1	1	3	1	1	3	3	3	3	3	2	2	3	2	1	2	4	2	2	2	1	1	5	1	5	1	5	2	1	5	5	1	3	2	4	4	4	2	4	4	4	4	1	1	1
1153	29	2	1	2	1	1	1	1	1	5	4	4	4	4	4	4	4	4	4	3	3	3	3	3	1	3	3	3	3	3	3	3	3	3	3	3	3	3	3	3	3	3	3	3	3	3	0	0	0
1154	34	2	1	2	1	1	1	1	1	5	4	4	4	4	1	1	1	1	1	4	3	1	3	3	1	1	4	1	4	1	5	1	1	2	5	2	5	5	1	5	5	1	1	1	1	1	0	0	1
1155	27	2	3	1	2	1	1	1	1	5	5	3	3	2	3	3	4	3	1	5	4	4	5	5	3	3	1	2	3	2	3	3	3	3	3	1	1	4	2	3	3	3	2	1	3	5	1	1	1
1156	35	2	1	2	1	1	3	1	1	2	4	2	3	2	2	1	3	3	2	3	1	3	3	3	3	3	1	2	2	2	2	2	2	2	2	1	1	1	2	1	1	1	1	1	1	1	0	0	0
1157	33	2	1	1	2	1	3	1	1	5	4	4	4	4	2	2	2	2	1	2	2	2	2	4	4	4	4	2	2	2	4	4	4	4	4	4	4	2	2	4	4	4	2	4	2	4	0	0	0
1158	41	2	1	2	1	1	2	1	1	5	5	4	5	4	2	2	2	2	1	3	1	1	4	4	2	2	3	2	3	2	4	2	2	4	4	2	4	2	2	4	4	2	2	3	2	4	1	1	1
1159	39	2	1	2	1	1	3	1	1	4	5	4	4	4	3	3	2	4	1	4	3	3	3	3	1	3	3	3	2	2	3	3	3	3	3	3	3	3	3	3	3	3	3	3	3	3	1	1	1
1160	30	2	1	1	1	1	1	1	1	2	3	3	2	3	4	3	3	3	1	3	3	3	3	3	2	1	4	4	1	1	4	4	4	4	4	4	4	1	2	3	3	4	4	4	4	4	1	1	1
1161	26	2	2	1	2	1	1	3	1	5	4	4	5	4	3	3	2	5	1	4	4	2	4	3	3	3	5	1	4	1	5	2	1	5	4	1	5	1	1	4	4	1	1	5	1	4	0	0	0
1162	33	1	1	2	3	1	1	3	1	3	3	2	3	3	3	2	3	2	1	3	3	3	3	3	2	1	3	3	3	3	3	3	2	2	2	2	2	3	3	3	2	2	2	2	2	3	2	2	1
1163	30	2	1	2	1	1	3	1	1	4	4	1	4	4	2	2	2	4	2	2	4	2	3	3	2	2	3	2	2	2	3	3	2	2	3	2	3	2	3	3	3	2	2	2	2	2	1	1	1
1164	45	2	1	2	1	1	2	1	1	4	4	4	4	4	4	2	2	2	1	2	2	2	2	2	2	2	4	2	4	2	4	2	2	2	4	3	3	2	3	3	3	2	3	2	3	3	1	1	1
1165	40	2	1	2	2	1	3	2	1	1	3	1	1	3	4	3	4	3	1	3	2	2	3	3	2	2	2	3	3	3	2	3	3	2	2	2	2	3	3	2	2	3	3	3	3	3	2	1	1
1166	33	1	1	1	2	1	1	2	1	2	3	3	2	3	4	2	4	2	2	2	2	2	2	4	2	2	4	1	4	2	4	2	2	2	4	2	2	2	2	3	3	2	2	3	2	2	1	1	1
1167	39	2	1	3	1	1	4	2	1	5	5	4	4	4	3	3	3	2	1	3	1	1	4	1	3	1	4	2	2	2	3	2	2	3	3	2	2	2	2	3	3	2	2	2	2	2	1	1	1
1168	47	2	1	2	1	1	3	2	1	4	4	4	4	4	1	1	1	3	1	1	4	1	4	3	1	1	2	2	2	2	5	2	2	2	4	2	1	2	2	4	1	1	1	2	1	1	1	1	0
1169	45	2	1	2	1	1	3	2	1	4	4	1	4	4	1	1	4	1	1	1	1	1	2	2	1	1	5	5	5	1	5	1	1	1	5	1	5	1	1	5	5	1	1	3	1	3	0	0	0
1170	48	2	1	2	1	1	2	2	1	4	4	4	4	4	2	4	3	2	2	2	2	3	3	3	3	3	4	1	3	2	4	2	1	3	4	1	4	1	3	4	4	1	2	3	1	4	1	1	0
1171	51	2	1	2	1	1	4	2	1	2	3	4	3	5	3	3	4	1	1	1	3	1	3	3	2	1	3	2	4	2	4	3	2	4	4	2	4	2	1	4	4	4	4	4	4	4	1	1	0
1172	45	2	1	2	1	1	4	2	1	3	3	3	3	3	3	3	3	2	3	3	3	3	3	3	1	3	3	3	3	3	3	3	3	3	3	3	3	3	3	3	3	3	3	3	3	3	1	1	1
1173	22	2	1	3	1	1	2	2	1	4	4	4	4	4	2	4	2	4	1	4	4	4	4	3	2	2	5	1	3	2	4	2	2	2	5	2	2	2	2	3	4	2	2	4	2	4	0	1	0
1174	38	2	1	1	1	1	3	2	1	3	3	3	3	4	2	2	2	2	1	2	2	2	2	2	2	2	4	3	2	4	3	3	4	3	3	4	3	4	4	3	3	4	3	4	2	3	2	3	1
1175	47	2	1	2	2	1	4	2	1	5	5	4	5	5	1	1	1	1	1	4	3	1	4	1	1	1	1	1	1	1	5	1	1	5	5	1	5	1	1	5	5	1	1	1	1	5	0	0	0
1176	30	2	1	1	2	1	2	3	1	4	4	4	4	4	2	2	2	2	2	2	2	2	2	4	2	2	3	1	4	1	4	2	1	2	4	3	4	1	2	2	4	2	4	2	2	4	1	0	0
1177	41	2	1	3	1	1	2	2	1	5	5	4	5	5	1	2	2	2	2	3	5	2	3	3	2	2	3	1	3	1	5	5	5	5	3	5	2	2	2	3	3	3	3	3	2	3	1	1	1
1178	43	2	1	2	1	1	3	2	1	3	4	4	4	4	1	2	2	2	2	3	4	2	4	4	2	2	4	1	3	1	4	1	2	4	4	3	3	1	2	2	4	2	2	2	2	3	0	0	0
1179	41	2	1	2	1	1	2	2	1	4	4	4	4	4	2	2	2	2	1	2	2	2	2	2	2	2	3	2	3	2	3	3	3	3	3	3	3	2	2	3	3	3	2	3	2	3	1	1	1
1180	43	2	1	2	2	1	3	2	1	4	4	4	4	4	4	4	4	3	4	4	4	4	4	4	4	4	4	4	4	4	4	4	4	4	4	4	4	4	4	4	4	4	4	4	4	4	0	0	0
1181	51	2	1	2	2	1	4	2	1	3	3	3	3	3	3	4	3	2	3	3	3	3	3	3	1	3	3	2	4	2	3	2	2	3	3	2	4	2	2	3	3	3	3	3	3	3	3	3	3
1182	43	2	1	3	2	2	3	3	1	4	4	4	4	4	2	3	3	4	1	5	4	3	3	3	2	2	3	2	2	2	4	2	2	2	3	3	3	2	3	3	3	3	3	3	3	3	1	1	1
1183	40	2	1	2	1	1	2	3	1	3	4	3	3	4	4	2	1	1	2	2	4	3	2	1	2	3	3	1	4	2	4	4	1	4	1	1	1	1	1	1	1	1	1	1	1	1	1	1	1
1184	26	2	1	2	1	1	2	3	1	3	3	3	3	3	3	3	3	2	3	3	3	3	3	3	1	3	3	3	4	2	4	2	2	2	4	2	4	2	2	2	2	2	2	4	4	4	1	1	2
1185	40	2	1	2	1	1	2	3	1	3	3	4	3	3	3	5	5	3	5	3	5	5	5	5	1	1	3	3	3	3	3	3	3	3	3	3	3	3	3	3	3	3	3	3	3	3	1	1	1
1186	26	2	1	2	1	1	2	3	1	4	4	2	2	4	5	5	2	2	1	4	3	1	4	4	3	3	4	2	4	2	4	2	1	5	5	1	5	5	2	4	5	5	2	4	2	5	3	1	1
1187	30	1	1	1	1	1	1	2	1	5	5	4	4	4	2	2	2	4	1	4	2	2	2	4	2	4	5	1	4	1	4	2	2	4	4	2	4	2	2	4	4	2	2	4	2	4	1	1	1
1188	36	1	1	1	1	1	1	2	1	4	5	4	4	4	2	2	2	2	1	4	2	2	4	4	2	2	4	2	4	2	4	3	2	4	4	2	3	2	4	3	4	2	4	4	4	3	1	1	1
1189	21	2	2	1	1	1	1	2	1	2	3	1	1	4	4	4	4	4	1	4	4	5	5	4	1	1	2	4	2	4	4	4	4	4	4	4	2	4	4	4	4	4	4	4	4	4	1	2	2
1190	19	2	2	1	1	1	1	2	1	5	5	4	5	5	5	5	5	3	1	3	2	2	3	4	3	2	5	1	5	1	5	1	1	1	4	1	1	1	1	3	3	3	1	1	1	1	1	1	0
1191	21	2	1	1	1	1	2	2	1	4	5	4	4	4	2	1	4	1	1	1	1	2	2	1	1	4	1	2	1	1	4	2	2	2	2	2	4	2	1	2	3	2	2	2	2	2	1	1	1
1192	24	2	1	3	1	1	1	2	1	5	5	4	5	5	1	2	3	3	1	5	2	2	3	3	2	2	3	2	2	3	2	3	3	3	3	3	3	2	3	2	3	2	2	3	2	2	1	2	1
1193	46	2	1	2	1	1	3	1	1	4	4	4	4	4	2	2	2	2	1	2	2	2	3	4	2	2	4	1	4	1	4	1	1	1	4	1	4	1	1	4	4	1	1	4	1	4	1	0	1
1194	29	2	1	2	1	1	3	1	1	3	4	3	3	3	3	3	4	3	1	3	3	3	3	3	3	2	3	3	2	3	4	2	3	2	2	2	2	2	2	2	2	2	3	3	3	3	1	1	1
1195	43	2	1	2	1	1	4	2	1	4	3	3	4	3	3	3	4	2	1	3	4	4	4	4	2	2	3	3	2	3	3	3	2	2	2	4	2	4	2	3	2	3	2	2	2	2	2	2	2
1196	22	2	1	1	1	1	1	1	1	4	4	4	4	4	4	4	4	3	3	3	3	3	3	4	4	4	1	1	1	1	1	1	1	1	1	1	1	1	5	1	1	1	1	1	1	1	1	0	0
1197	26	2	1	2	1	1	1	2	1	4	4	4	4	4	4	4	4	4	1	4	3	4	3	4	4	4	4	4	1	2	2	1	1	1	1	1	4	4	4	2	4	4	1	2	2	1	1	1	1
1198	29	2	1	1	1	1	1	2	1	4	4	4	4	4	2	2	2	2	1	2	2	2	2	4	2	2	4	2	3	2	4	4	4	4	4	4	4	2	4	4	4	2	2	4	2	4	1	1	1
1199	33	2	1	2	1	1	3	1	1	4	4	3	3	4	2	3	3	3	1	2	2	3	2	4	1	3	3	2	3	2	3	3	3	3	3	2	2	3	2	2	3	2	2	3	3	3	0	0	1
1200	30	2	1	2	1	1	2	3	1	4	4	4	4	4	5	4	4	4	5	4	4	4	4	3	2	2	1	1	2	1	1	1	1	2	2	1	4	1	1	1	1	1	1	1	1	1	1	1	1
1201	36	2	1	2	1	1	2	2	1	3	4	4	4	4	4	2	2	2	1	2	2	1	2	4	2	2	4	2	3	1	5	2	2	2	3	2	4	2	2	3	4	2	2	2	2	4	1	1	1
1202	22	2	1	2	1	1	2	3	1	3	3	4	3	3	4	2	2	2	1	2	2	2	2	4	2	2	4	2	3	2	4	2	2	2	3	2	3	2	3	3	3	2	2	2	2	4	1	1	1
1203	37	2	1	2	2	2	3	3	1	3	4	3	3	3	2	2	2	2	1	2	2	2	2	4	2	2	4	2	3	1	5	2	2	2	3	2	4	2	2	3	3	2	2	2	2	4	1	1	1
1204	56	2	1	1	2	2	4	3	1	3	4	3	3	3	2	2	2	2	1	2	2	2	2	4	2	2	4	2	3	1	5	2	2	2	3	2	3	2	2	3	3	2	2	2	2	3	1	1	1
1205	40	2	1	2	2	2	2	2	1	4	4	4	3	4	2	2	2	2	1	4	2	3	3	2	2	2	3	2	2	1	5	2	2	2	3	3	5	2	3	3	5	2	2	3	3	3	1	1	0
1206	32	2	1	2	2	2	3	2	1	3	3	3	3	2	2	2	2	2	2	2	2	2	4	4	2	2	5	1	3	1	5	1	1	2	4	2	2	2	2	3	4	2	2	4	2	4	0	1	0
1207	19	2	1	1	1	1	1	2	1	3	3	2	3	3	3	3	4	4	3	3	4	4	4	4	3	3	3	3	3	4	3	4	3	4	2	2	2	3	3	3	4	3	3	2	2	2	1	1	1
1208	33	2	1	3	1	1	1	2	1	1	4	1	1	3	5	4	5	3	1	5	5	5	5	5	2	2	1	5	1	5	1	5	5	5	1	5	3	5	5	1	3	5	5	1	5	1	2	3	3
1209	20	1	1	1	2	1	1	2	1	4	4	4	4	4	4	2	4	4	2	4	4	4	4	4	2	2	3	3	1	1	4	4	3	3	3	2	3	3	3	3	3	3	3	3	3	3	1	1	1
1210	22	1	2	1	2	1	1	2	1	4	4	4	4	4	2	2	2	4	2	4	3	4	3	4	3	2	3	2	2	1	5	5	3	5	4	5	5	3	3	3	3	5	2	5	5	3	1	1	1
1211	20	2	2	1	1	1	2	2	1	3	3	3	3	3	4	5	3	3	3	3	3	4	4	3	2	3	4	3	2	2	4	4	4	5	5	5	5	2	3	5	5	5	2	4	4	5	0	1	0
1212	29	2	1	3	2	1	2	2	1	4	4	4	3	3	3	3	3	3	1	3	3	3	4	4	3	3	4	2	4	2	4	2	2	1	4	2	3	2	2	3	4	2	2	2	2	3	1	0	1
1213	32	2	1	2	1	1	1	2	1	4	4	4	3	4	5	4	3	4	1	3	5	2	4	5	1	1	3	2	1	1	3	1	1	1	3	1	3	1	1	1	1	1	1	1	1	1	1	1	0
1214	29	2	1	2	1	1	1	2	1	4	4	3	3	4	3	4	3	1	1	1	2	3	4	4	1	1	1	1	2	1	2	2	2	4	2	1	1	1	1	1	1	1	1	2	2	2	1	1	0
1215	32	2	1	2	2	1	1	2	1	4	5	4	4	4	2	4	4	4	1	1	1	4	4	4	1	1	4	3	2	2	3	4	4	4	4	4	4	3	3	3	4	3	4	1	4	3	1	1	3
1216	45	2	1	2	2	1	2	3	1	4	4	4	4	4	2	2	2	2	1	2	2	2	2	4	2	2	3	2	2	2	4	2	2	2	4	2	2	2	2	4	4	2	2	4	4	4	1	1	1
1217	35	2	1	2	2	1	3	2	1	4	4	4	4	4	4	2	2	2	2	3	2	2	3	3	2	2	4	2	3	2	3	2	3	3	3	3	3	2	3	3	3	2	3	3	4	4	1	1	1
1218	39	2	1	2	1	1	3	3	1	4	4	3	3	4	3	2	4	2	1	3	4	5	5	5	2	2	3	2	3	2	4	2	2	2	3	2	3	2	2	3	3	3	3	3	3	3	1	1	0
1219	43	2	1	2	2	1	2	3	1	3	4	3	3	4	2	3	3	4	1	3	3	4	4	4	3	4	3	2	4	3	4	3	3	3	3	4	3	3	3	3	3	4	4	3	3	3	1	2	2
1220	43	2	1	2	1	1	3	3	1	4	4	4	4	4	2	1	1	1	1	1	1	3	2	4	1	1	4	1	4	1	4	1	1	1	4	1	4	1	1	4	4	1	1	4	4	4	0	0	0
1221	25	2	2	1	1	1	3	1	1	5	5	4	5	5	1	1	1	1	1	1	1	3	4	1	3	1	3	2	4	2	3	2	2	3	3	2	3	2	2	3	3	2	2	3	2	3	0	0	0
1222	42	2	1	2	1	1	4	3	1	1	4	1	1	1	1	1	1	1	5	3	1	5	5	5	1	1	3	3	3	2	3	2	3	3	3	3	3	2	2	3	3	3	3	2	2	3	1	1	1
1223	45	2	1	2	1	1	4	2	1	5	5	3	5	4	5	4	3	3	1	3	5	2	4	5	1	1	3	2	3	2	5	2	2	3	5	4	4	1	2	2	3	2	2	3	2	3	1	1	3
1224	45	2	1	2	2	1	4	2	1	4	4	4	4	4	1	1	1	1	1	2	1	1	4	4	3	3	4	1	4	2	4	4	2	4	4	2	3	2	3	4	3	3	1	1	1	1	0	0	0
1225	30	2	2	1	2	1	3	2	1	5	5	4	5	5	2	3	2	2	1	3	3	3	2	4	2	1	5	3	5	1	5	3	2	1	5	1	5	3	4	5	5	5	2	3	4	4	1	0	1
1226	45	2	1	3	1	1	3	1	1	4	4	4	4	4	4	3	3	4	2	4	5	5	3	4	4	4	4	2	2	2	4	3	3	3	4	2	4	2	3	4	3	3	2	4	2	3	1	1	1
1227	32	2	1	2	1	1	4	2	1	4	4	4	4	5	4	4	4	4	4	3	2	2	4	4	2	2	5	1	5	1	5	1	1	5	5	1	5	1	1	5	5	1	1	5	5	5	0	0	0
1228	36	2	1	2	1	1	2	2	1	4	4	4	4	4	4	4	4	4	1	3	4	2	2	4	1	3	3	3	3	3	3	3	3	3	3	3	3	3	3	3	3	3	3	3	3	3	1	1	1
1229	37	2	1	2	1	1	3	2	1	3	3	3	3	3	3	3	3	2	4	3	3	4	4	4	3	4	3	4	5	1	4	1	1	5	5	2	4	1	4	4	4	2	4	4	3	2	2	2	1
1230	48	2	1	2	1	1	3	1	1	3	3	3	3	3	3	2	2	3	1	3	2	1	2	4	1	1	3	2	3	3	4	3	3	3	3	3	3	3	3	3	4	2	2	4	4	2	1	2	1
1231	40	2	1	2	2	1	3	1	1	5	5	4	4	3	4	3	3	4	4	4	4	4	4	4	4	4	1	1	1	1	1	1	1	1	1	1	1	1	1	1	1	1	1	1	1	1	0	0	0
1232	32	2	1	2	2	1	3	2	1	5	5	4	5	5	1	1	1	1	1	5	1	1	4	1	2	3	4	2	4	1	4	1	2	2	4	2	4	2	2	4	4	1	1	4	1	3	0	0	1
1233	46	2	1	2	2	1	4	1	1	3	3	3	3	3	3	3	3	2	3	3	3	3	3	3	1	3	3	1	1	1	4	1	1	1	1	1	1	1	1	1	4	1	1	1	1	1	0	0	0
1234	28	1	1	1	1	1	1	2	1	4	4	4	4	5	2	2	2	3	2	4	4	3	3	3	2	2	4	4	4	2	3	2	3	2	2	2	3	2	3	2	4	4	4	4	2	4	1	1	1
1235	46	2	1	2	2	1	4	2	1	4	4	4	4	4	2	4	2	4	4	4	4	4	3	4	4	4	4	4	4	2	3	2	3	3	2	2	3	2	3	2	4	4	4	4	2	4	1	1	0
1236	47	2	1	2	1	2	3	1	1	5	5	4	5	5	4	4	3	2	1	4	2	2	2	4	3	2	5	5	5	1	5	1	3	4	4	1	5	5	3	2	4	2	4	3	2	4	1	0	0
1237	44	2	1	2	1	1	4	1	1	3	4	3	4	5	2	2	2	3	1	2	2	3	3	4	2	2	4	2	3	1	4	3	2	4	4	2	4	2	2	3	4	2	2	4	1	4	1	1	1
1238	42	2	1	2	1	1	1	2	1	3	4	4	5	5	2	4	2	3	1	3	2	2	2	4	3	1	5	2	2	1	5	2	2	2	4	1	3	3	2	4	4	2	2	4	4	3	0	1	1
1239	19	2	1	1	1	1	1	1	1	3	4	4	4	4	2	2	2	2	1	2	2	2	2	2	2	2	2	2	3	3	3	2	3	3	3	3	2	3	4	3	3	2	3	2	3	3	1	3	3
1240	41	2	1	2	1	1	2	1	1	5	5	4	4	5	2	2	2	2	1	4	2	2	3	3	1	1	4	1	1	1	4	2	1	4	4	2	2	2	2	3	4	2	2	3	2	3	0	0	1
1241	33	1	2	1	3	1	1	3	1	2	3	2	4	4	2	2	2	3	2	2	2	2	3	3	2	2	4	1	2	2	2	2	2	2	2	2	3	2	2	2	2	2	2	2	2	5	1	1	1
1242	42	2	1	3	1	1	3	2	1	4	3	4	3	4	2	4	4	4	5	3	4	2	4	4	4	4	1	1	2	1	3	1	4	3	4	4	1	1	1	1	1	1	1	1	1	1	0	0	0
1243	41	2	1	2	1	1	4	2	1	3	3	3	3	3	3	3	3	3	3	3	3	3	3	3	1	3	4	1	4	1	3	2	2	2	2	2	2	2	2	2	2	2	2	2	2	2	1	1	1
1244	36	2	2	2	1	2	4	2	1	5	5	5	5	5	2	2	2	3	3	3	3	3	3	3	1	3	1	1	1	1	1	1	1	1	1	1	1	1	1	1	1	1	1	1	1	1	0	0	0
1245	44	2	2	2	2	1	4	3	1	3	4	4	4	4	2	4	1	4	2	2	3	3	4	4	1	1	4	2	3	2	4	2	2	2	3	3	3	2	3	4	4	3	2	2	4	4	0	0	1
1246	47	2	1	3	1	1	4	1	1	4	3	3	3	3	2	2	3	3	1	4	4	4	4	4	2	2	2	2	1	2	4	4	4	4	4	4	4	2	4	3	3	3	3	3	4	4	1	1	2
1247	35	2	1	2	1	2	3	1	1	5	4	4	4	4	4	4	3	2	1	1	2	3	3	4	2	3	4	1	3	2	4	2	2	4	4	2	4	1	2	4	4	2	2	3	2	4	0	1	1
1248	43	2	1	2	1	1	4	1	1	3	4	4	4	4	4	4	4	1	1	1	1	4	4	4	1	3	3	3	3	3	3	3	3	3	3	3	3	3	3	3	3	3	3	3	3	3	1	1	1
1249	33	2	1	2	1	1	3	1	1	4	3	3	4	4	2	2	2	2	1	3	4	2	2	4	2	2	4	2	4	1	5	1	2	3	4	2	4	2	2	4	4	2	2	4	2	4	0	0	0
1250	38	2	1	2	1	1	2	1	1	4	3	3	4	4	2	2	3	3	1	3	4	4	4	4	2	2	2	3	1	2	4	4	4	4	4	4	4	2	2	4	4	4	4	4	4	4	1	1	2
1251	39	2	1	2	1	1	3	3	1	3	3	3	3	4	3	3	3	3	3	3	3	3	3	3	2	2	1	4	2	2	4	4	4	2	2	4	4	2	4	4	4	4	4	4	4	4	0	1	1
1252	42	2	1	2	1	2	4	2	1	3	4	4	4	4	3	2	2	2	1	4	4	3	3	4	2	2	2	3	2	2	2	4	4	2	2	3	3	4	3	2	3	2	4	2	4	2	2	1	1
1253	51	2	1	2	1	1	4	1	1	3	3	3	4	3	3	3	3	3	3	3	3	3	3	3	1	3	1	2	1	1	1	1	1	1	1	1	1	2	1	3	3	3	3	3	3	3	1	1	1
1254	35	2	1	2	1	1	3	1	1	4	4	3	2	1	2	2	2	3	4	3	3	3	3	3	2	2	3	2	2	2	4	3	2	3	2	3	3	2	2	3	3	2	3	3	2	4	2	1	1
1255	46	2	1	2	1	1	4	1	1	3	3	3	3	3	3	3	3	3	3	3	3	3	3	3	1	3	4	2	4	1	5	1	1	1	4	4	4	4	4	4	4	1	4	4	4	4	1	1	1
1256	36	1	1	1	2	1	3	3	1	3	4	4	4	4	2	2	2	4	1	3	3	3	3	3	2	1	3	2	1	2	3	1	1	3	4	2	2	2	2	4	4	2	2	4	2	4	1	1	1
1257	34	2	1	2	1	1	4	1	1	3	3	3	3	2	2	3	3	3	1	3	3	3	3	3	2	2	3	2	2	2	3	2	2	2	2	2	3	2	2	3	3	3	2	3	2	3	1	1	1
1258	45	2	1	2	1	1	3	1	1	3	3	3	3	3	2	2	2	2	2	2	2	2	2	4	2	2	3	1	3	1	2	2	3	2	2	2	2	2	2	3	2	2	2	2	2	2	1	1	1
1259	34	2	1	2	1	1	4	1	1	3	4	4	4	4	4	2	4	4	1	1	2	3	4	3	2	2	3	1	3	2	4	2	2	4	4	2	4	2	2	4	4	2	2	4	2	3	1	1	1
1260	29	2	2	1	2	2	3	3	1	3	2	3	4	4	3	3	4	2	2	3	2	2	3	3	3	4	2	2	1	1	1	2	2	2	1	2	1	2	1	1	2	2	2	2	2	2	1	0	0
1261	54	1	3	2	2	2	4	2	1	3	4	3	4	3	3	4	4	2	4	4	4	2	2	4	3	2	4	3	4	4	3	4	4	3	4	3	3	4	4	4	3	3	4	4	4	4	2	2	1
1262	43	2	1	2	1	2	4	1	1	3	4	4	4	4	4	4	4	4	4	3	3	3	3	3	2	1	4	2	3	5	3	3	2	3	3	2	3	3	3	3	3	3	3	2	2	2	1	1	1
1263	47	2	2	2	3	2	4	2	1	3	4	4	4	4	2	2	2	2	1	2	2	2	3	3	2	2	3	2	3	1	3	2	2	3	4	2	3	2	2	3	3	2	2	3	2	3	1	1	1
1264	46	1	2	3	2	2	4	3	1	4	4	4	4	4	4	3	2	3	3	3	4	3	3	4	2	2	4	3	2	2	4	3	2	4	4	4	4	2	1	2	4	2	2	4	2	4	1	1	1
1265	37	1	3	2	3	2	3	2	1	3	3	3	3	4	2	4	4	4	4	3	4	2	2	2	2	3	2	2	2	2	3	3	2	2	2	3	2	3	2	3	2	2	2	3	2	3	1	1	1
1266	39	2	1	2	1	2	4	1	1	5	3	4	4	4	4	4	4	2	3	2	3	4	4	4	3	5	1	1	3	3	2	3	3	3	3	3	2	2	2	3	3	2	3	3	4	2	1	2	2
1267	28	2	3	2	1	2	1	2	1	4	4	4	3	4	2	2	2	2	1	2	2	2	3	3	2	2	3	5	3	1	3	3	3	3	3	3	3	1	3	3	3	3	3	3	3	4	1	1	1
1268	38	2	1	2	1	2	3	1	1	4	4	4	4	4	4	4	4	4	4	3	4	4	4	4	4	4	4	4	2	1	1	1	1	1	1	1	1	1	1	3	3	3	1	3	1	3	0	0	0
1269	51	1	3	2	3	2	4	2	1	4	4	2	4	4	2	3	4	2	1	3	3	3	3	3	1	1	3	2	3	2	3	2	2	3	3	2	3	2	2	3	3	3	3	3	2	3	2	1	1
1270	38	1	3	2	3	2	4	2	1	4	4	4	4	4	2	2	2	2	1	2	2	2	4	3	3	2	3	2	3	2	4	4	4	4	4	2	4	2	2	4	4	2	2	4	2	4	0	1	0
1271	33	2	2	1	1	2	3	3	1	3	4	3	3	4	2	3	3	3	2	3	3	3	4	3	3	2	2	2	2	2	2	3	3	2	3	3	3	2	3	3	3	2	3	3	3	2	1	1	1
1272	57	2	2	2	2	2	4	2	1	4	4	4	4	4	2	2	3	2	1	2	4	2	3	4	2	2	3	2	3	1	4	2	2	4	4	2	3	4	3	4	4	2	2	4	3	4	1	1	0
1273	46	2	3	2	1	2	4	1	1	3	3	3	3	3	3	3	3	3	3	3	3	3	3	3	1	3	3	3	3	3	3	3	3	3	3	3	3	3	3	3	3	3	3	3	3	3	2	2	2
1274	36	2	1	2	1	1	4	1	1	3	4	4	3	4	1	2	2	2	1	3	2	2	3	4	2	1	3	1	2	1	5	2	3	3	4	1	3	2	2	4	4	2	2	4	2	4	0	1	1
1275	35	1	1	2	1	2	4	2	1	3	4	3	3	3	3	3	2	3	2	3	3	2	3	3	2	2	3	2	3	2	4	2	3	3	3	2	3	2	2	4	4	2	2	4	3	4	2	1	0
1276	19	2	1	1	1	1	1	1	1	5	5	4	5	5	1	2	2	2	1	1	1	1	2	4	2	2	4	1	4	1	4	2	2	1	4	2	4	2	2	4	4	2	2	4	2	4	0	0	1
1277	39	2	1	2	1	1	4	1	1	4	4	4	4	4	4	4	4	4	4	4	4	4	3	4	2	2	4	2	4	4	4	2	2	2	2	2	3	3	2	2	2	2	2	2	3	3	1	1	1
1278	41	2	1	3	1	1	4	1	1	4	4	4	4	4	2	2	2	2	1	3	3	3	3	5	3	2	3	3	2	2	3	2	2	3	3	2	3	2	2	2	3	3	3	3	3	3	1	1	0
1279	40	2	2	2	2	2	4	2	1	3	3	3	3	3	3	3	3	3	3	3	3	3	3	3	1	3	3	3	2	2	3	3	2	2	3	3	3	2	4	2	3	3	2	3	3	2	1	2	1
1280	41	2	1	2	1	1	4	1	1	3	4	4	4	4	4	1	1	4	4	1	1	1	4	4	3	4	4	4	4	4	4	4	4	4	4	4	4	4	4	4	4	4	4	4	4	4	0	0	1
1281	39	2	1	3	1	1	4	1	1	4	4	4	4	4	2	4	4	2	1	4	2	3	3	3	1	1	4	3	3	4	4	3	2	2	2	4	3	2	3	2	4	3	3	3	2	4	2	1	2
1282	37	2	1	2	1	1	4	1	1	3	3	2	3	3	2	3	3	2	1	4	4	4	3	4	1	1	2	3	2	2	2	3	4	4	3	2	3	2	2	2	3	2	4	4	4	4	1	1	2
1283	46	2	1	2	2	1	4	1	1	4	4	4	4	4	2	2	4	2	1	4	2	3	3	3	1	1	4	3	3	4	4	3	2	2	2	4	3	3	4	2	4	3	3	3	2	4	2	1	2
1284	50	2	1	2	2	2	4	1	1	5	4	3	4	4	3	2	4	4	1	2	2	2	2	2	2	2	2	2	2	2	4	2	2	2	4	2	4	2	2	4	4	2	2	2	4	2	0	0	1
1285	19	2	1	1	1	1	1	1	1	4	4	4	4	4	2	2	4	2	1	2	2	2	3	3	2	2	2	2	3	2	4	3	2	2	4	4	4	2	2	4	4	2	2	4	3	4	1	1	1
1286	31	2	1	2	1	1	2	2	1	4	4	4	4	4	4	2	2	2	1	2	2	2	2	2	2	2	4	2	2	2	4	4	4	2	4	4	4	2	2	4	4	2	2	2	2	4	0	0	0
1287	33	1	1	1	1	1	4	1	1	4	4	4	4	4	2	2	2	2	1	3	3	3	2	4	2	2	3	3	3	3	3	3	3	3	3	2	2	2	3	3	3	3	3	3	1	3	1	1	1
1288	37	2	1	2	1	1	3	2	1	5	5	4	5	5	2	2	2	4	1	4	5	5	5	5	3	5	5	1	2	1	5	1	1	2	5	1	4	1	1	4	4	2	2	4	2	4	1	1	0
1289	37	2	1	2	1	1	4	2	1	3	5	3	4	4	2	2	2	2	1	3	2	3	2	4	2	2	4	2	3	2	4	3	2	2	2	3	3	2	3	3	3	2	3	2	2	3	2	1	2
1290	37	2	1	2	1	1	4	2	1	4	4	4	4	4	4	1	5	2	1	5	5	5	5	5	1	1	3	2	3	2	3	3	4	3	2	2	4	4	4	3	2	4	4	4	5	3	0	1	0
1291	46	2	1	2	1	1	3	1	1	4	4	4	4	4	1	1	1	1	1	1	4	1	4	3	1	1	3	2	3	2	4	1	1	1	3	2	3	1	2	3	3	2	1	2	1	3	1	1	0
1292	42	2	2	2	1	1	1	2	1	4	4	4	4	4	3	2	2	2	2	2	2	2	2	2	3	1	5	5	3	2	5	3	2	2	4	2	4	2	2	3	3	2	2	4	2	3	1	1	1
1293	33	2	1	3	2	1	2	1	1	3	4	4	5	4	3	3	4	4	3	3	3	2	3	3	2	2	4	2	3	1	3	1	2	3	2	2	1	2	2	3	4	2	1	4	2	4	0	1	0
1294	33	2	1	2	1	1	2	1	1	3	3	3	3	3	3	3	3	2	2	2	2	4	4	4	2	1	2	3	1	2	3	3	4	4	2	4	2	2	3	2	2	2	2	3	4	4	1	1	1
1295	34	2	1	2	2	2	3	4	1	4	4	4	4	4	4	3	3	3	3	3	4	4	4	4	2	2	3	4	4	3	3	3	3	3	3	3	3	3	4	3	3	3	4	4	4	4	0	1	1
1296	31	2	1	2	2	1	1	4	1	4	4	4	4	4	2	3	3	3	1	2	3	3	3	3	2	2	3	3	4	3	4	3	3	3	3	1	3	1	1	1	1	2	3	3	3	3	1	1	1
1297	46	2	1	3	2	1	3	4	1	3	3	3	3	3	3	3	3	3	3	3	3	3	3	3	1	3	3	3	3	3	3	3	3	3	3	3	3	3	3	3	3	3	3	3	3	3	1	1	2
1298	33	2	1	2	2	1	1	4	1	4	4	4	4	4	2	2	2	2	1	2	2	2	2	4	2	1	3	2	3	1	5	2	2	2	3	2	1	1	2	1	2	2	2	1	2	4	0	1	1
1299	30	1	2	2	2	1	3	4	1	4	4	3	4	4	2	2	2	2	1	2	2	2	2	4	2	2	3	2	3	2	3	2	2	1	2	2	3	2	2	3	3	1	2	3	2	3	0	1	1
1300	32	2	1	2	2	1	3	4	1	4	4	4	4	4	4	4	4	4	4	3	4	4	4	4	4	4	1	2	2	2	2	1	2	2	2	2	1	2	2	2	2	2	2	2	2	2	2	1	1
1301	45	2	1	2	2	2	4	4	1	4	4	4	4	4	2	2	3	2	1	2	4	2	3	4	2	2	3	2	2	2	4	4	2	3	3	2	2	3	2	4	3	2	2	3	2	3	0	1	0
1302	32	2	1	2	2	1	1	4	1	2	3	4	3	3	4	2	1	4	1	2	2	2	4	4	2	2	1	2	2	1	4	2	2	2	4	2	4	2	2	4	4	2	2	4	2	4	1	0	0
1303	35	2	1	3	2	1	3	4	1	4	5	4	4	4	2	2	2	3	2	2	2	2	3	3	2	1	4	2	3	1	4	4	2	4	4	2	4	2	2	2	3	2	2	1	2	4	1	0	1
1304	19	2	1	1	2	1	1	4	1	3	3	3	3	3	3	1	2	3	3	3	3	3	3	3	1	1	4	1	3	1	5	1	1	3	3	2	3	2	2	3	3	2	2	3	2	3	1	2	2
1305	42	2	1	2	2	1	2	3	1	4	4	4	4	4	4	4	3	3	3	4	4	1	4	3	1	1	5	1	5	1	5	1	1	1	5	1	5	1	1	5	5	1	1	5	5	5	2	2	2
1306	36	2	1	2	2	1	1	4	1	3	3	3	3	2	3	3	3	3	2	2	2	3	3	3	2	2	3	2	2	2	3	3	3	4	3	4	3	2	2	3	4	2	5	5	5	5	2	3	3
1307	27	2	1	2	2	1	2	4	1	5	5	4	5	5	1	1	1	2	1	2	4	2	2	2	2	2	4	2	2	2	4	2	2	2	4	2	3	1	2	3	4	2	2	3	2	3	0	0	0
1308	39	2	1	2	2	1	1	4	1	1	4	1	1	1	1	1	1	1	1	1	1	3	4	1	1	1	1	1	1	1	1	2	1	2	1	1	1	1	1	1	2	2	1	1	1	2	0	0	0
1309	27	2	2	2	1	2	2	1	1	5	5	4	5	5	3	3	3	3	1	2	3	3	3	2	2	2	3	3	3	2	4	2	3	3	3	3	3	2	2	3	5	2	3	3	3	3	0	1	1
1310	40	2	1	2	1	2	1	1	1	4	4	4	3	5	2	2	4	2	2	4	3	3	2	2	2	2	4	1	1	1	4	1	1	1	4	1	1	1	1	1	1	1	1	4	1	1	0	0	0
1311	26	2	1	2	2	2	3	1	1	3	4	3	4	3	4	5	3	2	3	3	3	2	3	5	3	2	3	5	4	3	3	3	3	3	3	5	5	4	5	5	5	4	5	4	3	3	2	2	3
1312	24	1	2	1	2	2	2	3	1	4	4	4	4	4	2	2	3	4	2	4	2	3	4	4	2	2	3	2	2	1	3	2	2	4	4	2	4	2	2	3	3	3	2	4	2	4	1	1	0
1313	47	2	2	2	2	2	4	3	1	5	5	5	5	5	1	1	1	1	1	1	1	3	4	1	3	5	5	1	5	1	5	1	1	5	5	1	5	1	1	5	5	1	1	3	1	5	0	0	0
1314	25	1	1	1	2	2	2	3	1	4	4	2	4	4	2	2	2	2	1	3	2	3	4	3	2	2	4	2	4	2	4	4	3	3	3	3	3	2	3	3	3	3	3	3	3	3	0	1	1
1315	32	2	2	2	2	2	3	1	1	4	4	4	4	4	2	2	2	2	1	1	2	3	2	4	1	1	4	4	2	2	4	2	2	2	2	1	4	2	2	1	4	2	2	1	2	4	1	1	1
1316	30	2	2	2	2	2	3	1	1	4	4	4	4	4	1	1	1	2	1	2	2	2	2	2	3	1	3	2	3	2	4	4	3	4	4	2	3	4	4	4	4	1	4	4	3	3	0	0	0
1317	43	2	3	2	2	2	3	1	1	4	5	4	4	4	2	2	2	2	2	2	2	4	4	4	2	1	2	3	1	2	3	3	4	4	2	4	2	2	3	2	2	2	2	3	4	3	1	1	1
1318	26	2	1	2	2	2	1	4	1	1	4	1	1	1	3	3	4	2	1	3	3	3	5	2	2	2	3	1	3	1	3	2	1	3	3	1	3	1	3	4	3	1	1	3	2	3	1	1	0
1319	32	2	1	2	2	2	2	4	1	3	3	3	3	4	2	3	2	2	1	2	2	2	3	3	2	2	3	2	2	2	4	2	2	2	3	3	3	2	2	2	3	2	2	2	3	3	1	1	0
1320	41	1	2	2	3	2	4	4	1	5	5	3	5	4	4	5	4	5	1	4	5	3	4	4	3	4	5	1	1	1	1	1	1	1	1	1	1	1	1	1	1	1	1	1	1	1	0	1	0
1321	37	2	1	2	2	1	4	4	1	4	4	4	4	4	2	3	4	2	2	3	3	2	3	3	3	1	3	2	3	2	4	2	2	4	4	4	2	2	2	3	3	2	2	3	2	3	1	1	1
1322	33	2	1	2	2	1	3	3	1	2	2	4	2	4	2	2	2	2	1	2	2	2	2	2	2	2	4	1	4	2	4	4	2	1	4	2	2	2	1	1	1	1	1	2	1	1	0	0	0
1323	41	2	1	2	2	1	4	4	1	3	4	3	2	3	3	3	4	3	3	3	3	2	3	3	2	2	4	2	4	2	4	3	3	4	3	2	2	2	2	3	4	2	3	2	3	2	2	1	1
1324	45	2	1	2	2	1	4	4	1	4	4	4	4	4	3	3	4	3	3	3	3	5	5	1	1	1	2	2	2	2	2	2	2	2	2	4	4	2	2	2	2	2	2	2	2	2	0	1	1
1325	25	1	3	1	2	1	1	1	1	4	5	5	4	5	2	2	2	2	1	2	3	4	4	3	2	2	3	1	5	1	5	1	1	5	5	1	5	1	5	5	5	1	1	5	1	1	0	0	0
1326	21	1	2	1	1	1	1	4	1	3	3	3	3	3	2	2	2	3	2	3	3	3	3	3	2	2	2	2	2	2	3	3	3	2	3	3	3	2	2	2	3	3	2	2	5	4	1	1	3
1327	19	2	1	1	2	1	1	4	1	4	5	3	5	4	2	2	2	4	1	5	2	2	3	4	2	2	3	1	1	2	5	4	3	4	4	3	4	2	4	4	5	2	2	2	3	4	1	1	1
1328	20	1	1	1	2	1	1	4	1	3	4	2	4	4	4	4	4	2	1	3	4	4	4	4	2	2	3	2	2	2	4	4	5	4	4	4	4	5	5	5	5	4	4	4	4	4	1	1	0
1329	36	2	1	2	2	1	2	4	1	4	3	4	3	3	2	4	3	2	1	3	3	3	3	4	3	2	3	2	2	4	3	3	3	4	2	4	2	3	4	3	2	2	3	3	4	2	1	1	2
1330	32	2	2	2	2	2	2	2	1	4	4	4	4	3	1	1	2	2	1	2	3	3	3	3	2	2	3	3	3	3	3	3	3	3	3	3	3	3	3	3	3	3	3	3	3	3	1	1	1
1331	26	1	3	1	2	2	3	3	1	3	3	3	3	2	2	3	3	2	1	3	5	3	3	5	1	1	2	1	3	1	2	1	2	2	1	2	2	2	2	1	3	3	2	4	4	2	3	3	0
1332	30	2	1	2	2	1	2	4	1	4	4	3	4	4	2	2	2	2	1	4	2	3	3	2	2	2	3	2	3	2	3	4	4	2	4	4	2	2	3	2	4	3	3	2	4	4	1	1	1
1333	32	2	2	1	2	1	2	4	1	4	4	3	4	3	1	3	4	1	3	3	4	4	3	3	1	4	1	1	1	1	1	1	1	1	1	1	3	1	1	1	3	1	1	1	3	1	0	0	0
1334	21	2	1	1	2	1	2	4	1	3	3	3	3	3	4	3	3	3	3	3	3	4	3	1	1	1	3	3	3	1	3	1	1	1	1	1	1	1	1	1	1	1	1	1	1	1	0	0	0
1335	28	2	1	1	2	1	2	4	1	4	4	4	4	4	2	2	4	4	1	4	4	2	2	4	2	2	3	3	3	3	4	4	3	3	3	3	3	3	3	3	3	3	4	4	4	4	1	1	1
1336	41	2	1	2	2	1	3	4	1	5	5	4	5	5	5	5	1	5	5	5	5	1	5	5	3	5	3	3	3	3	1	1	1	1	1	4	4	4	4	3	4	2	3	4	2	4	0	0	0
1337	23	2	1	2	2	1	1	4	1	4	4	4	4	4	1	1	1	1	1	1	3	1	4	3	1	1	4	1	4	2	4	1	1	1	1	1	4	1	1	1	4	1	1	4	3	4	1	1	0
1338	25	2	1	1	2	1	1	4	1	3	4	3	4	3	2	1	1	1	1	1	1	1	4	1	1	1	1	1	1	1	1	1	1	1	1	1	2	1	1	1	1	1	1	1	1	1	0	0	0
1339	22	2	3	1	2	1	1	4	1	3	3	3	3	3	2	2	2	2	2	3	4	2	2	4	2	2	3	2	3	2	3	3	2	2	3	2	3	3	2	2	3	2	2	2	2	3	0	0	0
1340	33	1	1	1	2	1	1	3	1	4	4	4	4	4	3	3	4	3	3	3	3	3	3	3	1	3	3	3	3	3	3	3	3	3	3	3	3	3	3	3	3	3	3	3	3	3	2	2	2
1341	23	2	1	1	2	1	2	4	1	3	3	3	3	4	4	3	3	3	1	3	4	4	4	4	1	1	3	2	3	2	3	2	2	1	3	3	2	3	1	3	3	2	2	2	2	3	1	0	1
1342	27	2	2	2	1	2	1	1	1	5	5	4	5	3	2	3	4	1	1	4	1	3	4	2	3	1	5	1	5	1	5	1	1	1	5	1	5	1	1	5	5	1	1	5	1	5	0	0	0
1343	30	2	1	1	2	1	1	3	1	5	5	5	5	5	4	5	4	4	4	4	3	3	3	4	3	3	4	4	2	2	3	3	2	2	3	2	3	2	2	3	3	2	2	2	2	2	1	1	1
1344	36	2	1	2	2	1	2	3	1	4	4	4	4	4	2	2	2	4	1	3	3	2	2	4	1	4	4	4	4	4	4	4	3	3	3	3	4	1	2	2	3	3	3	3	3	3	0	0	0
1345	30	2	1	2	2	1	3	4	1	4	4	4	4	4	2	2	2	4	1	2	2	2	2	2	2	2	4	2	4	2	4	2	2	2	4	4	4	2	2	2	4	2	2	4	2	3	0	0	0
1346	29	1	1	1	2	1	1	5	1	3	4	3	3	3	3	3	4	3	1	2	2	2	2	4	2	1	1	2	3	2	4	2	2	2	4	2	1	2	2	3	4	2	2	2	2	2	1	1	0
1347	27	2	1	2	2	1	1	4	1	4	4	3	4	4	2	2	2	2	1	2	2	2	3	3	2	1	4	1	3	1	3	3	3	3	3	3	3	1	3	3	3	3	2	3	3	3	1	1	1
1348	26	1	2	1	2	2	1	3	1	4	5	4	4	4	2	2	2	4	1	3	3	2	2	4	2	1	1	1	1	1	1	1	1	1	1	1	1	1	1	1	1	1	1	1	1	1	0	0	0
1349	23	2	1	2	2	1	2	3	1	5	5	4	5	5	2	2	2	2	1	1	1	1	5	2	3	5	4	1	1	1	2	2	2	2	4	1	4	1	1	4	5	1	1	1	1	4	0	0	0
1350	25	2	1	2	2	1	1	4	1	4	4	4	4	4	2	2	2	2	1	2	2	2	2	2	2	2	4	2	2	2	2	4	2	2	2	2	3	2	2	2	4	2	2	2	2	2	0	1	1
1351	29	2	1	1	1	1	2	4	1	5	5	4	4	4	2	2	2	3	1	3	2	1	2	2	2	2	4	2	4	1	4	2	2	4	4	4	4	2	1	3	3	1	1	3	2	4	1	0	1
1352	29	2	2	2	2	1	3	4	1	3	3	3	3	3	4	3	3	3	3	3	3	3	3	3	1	3	1	1	1	1	1	1	1	1	1	1	1	1	1	1	1	1	1	1	1	1	2	2	1
1353	35	2	1	2	2	1	1	4	1	4	5	3	5	5	1	2	1	2	1	4	2	2	2	4	2	2	3	2	2	1	3	3	3	2	2	3	4	2	2	3	4	3	2	3	3	3	0	0	0
1354	42	2	1	2	2	1	3	4	1	3	3	3	3	3	2	3	3	4	1	2	3	3	3	3	3	3	4	3	3	3	3	3	3	3	3	2	2	2	3	3	3	3	2	3	3	3	1	1	1
1355	34	2	1	2	2	1	1	4	1	4	4	4	4	4	3	3	4	3	1	3	3	3	3	3	2	2	3	2	3	2	4	3	2	2	3	2	3	2	2	3	3	2	2	3	2	3	1	1	1
1356	45	2	1	2	2	2	2	4	1	4	5	3	4	4	1	2	1	2	2	3	5	3	2	4	1	1	3	3	3	3	3	3	4	3	3	4	3	3	3	3	3	2	3	3	2	3	1	1	1
1357	31	2	1	2	2	1	1	4	1	4	4	4	4	4	2	2	2	4	3	3	4	3	3	3	2	2	3	3	3	3	4	3	3	4	4	1	4	1	3	3	3	3	1	3	3	3	1	1	1
1358	35	2	1	2	2	1	1	4	1	3	3	3	3	3	4	3	3	3	3	3	3	3	3	3	1	3	3	3	3	3	3	3	3	3	3	3	3	3	3	3	3	3	3	3	3	3	1	1	1
1359	36	2	1	2	2	1	3	4	1	4	4	3	4	4	2	3	3	2	1	3	4	4	4	4	2	2	3	3	3	3	3	3	3	3	3	3	3	3	3	3	3	3	3	3	3	3	1	1	1
1360	26	2	1	1	2	1	1	4	1	4	4	3	3	4	2	3	2	2	2	3	2	2	3	3	2	2	2	2	2	2	3	2	2	2	2	3	3	2	2	3	3	3	3	3	3	3	0	1	1
1361	31	2	1	2	2	1	2	4	1	3	3	3	3	3	4	3	4	4	4	4	4	4	4	4	4	4	4	2	3	2	3	2	2	3	3	2	3	2	2	3	3	2	2	3	3	3	1	1	0
1362	29	2	1	2	2	1	3	4	1	4	4	4	4	4	2	2	2	4	2	4	5	2	2	4	2	2	4	1	4	1	4	2	2	4	4	4	4	2	2	4	4	4	4	4	4	4	0	0	0
1363	25	2	1	3	2	1	1	4	1	4	4	4	4	4	4	2	2	4	2	4	2	2	2	4	2	2	4	4	4	2	4	2	2	4	4	4	4	2	2	4	4	4	4	4	4	4	0	0	0
1364	35	2	1	1	2	1	1	4	1	4	5	4	4	4	1	3	4	2	1	3	3	3	4	4	1	1	2	2	4	2	3	4	3	2	3	3	3	3	4	2	4	4	3	2	3	3	0	1	1
1365	24	2	1	1	2	1	1	4	1	4	4	4	4	4	2	2	2	2	2	2	2	2	2	2	2	2	4	2	2	2	4	4	2	4	4	2	3	2	4	2	4	4	2	4	2	4	1	1	1
1366	36	2	1	2	2	1	4	4	1	4	4	3	3	4	4	4	3	2	1	3	2	2	2	4	2	2	3	3	3	3	3	3	3	3	3	3	3	3	3	3	3	3	3	3	3	3	1	1	1
1367	22	2	3	1	2	1	1	4	1	5	5	4	5	3	4	5	3	3	4	2	3	3	4	3	3	3	1	1	1	1	1	3	2	4	2	4	2	4	2	3	2	4	3	2	3	4	1	2	1
1368	34	2	1	2	2	1	4	4	1	4	4	4	4	3	4	3	3	3	3	4	4	3	3	3	1	2	3	3	2	3	3	3	3	3	3	3	3	3	3	3	3	3	3	3	3	3	1	1	1
1369	39	2	1	2	2	2	4	4	1	4	4	3	4	3	2	2	2	2	1	4	4	3	3	4	2	2	3	2	2	1	3	4	3	4	3	3	4	2	2	3	4	3	2	3	3	3	1	1	1
1370	33	2	2	2	2	1	1	4	1	5	5	2	5	4	2	1	1	4	1	4	2	1	4	5	3	2	5	4	4	1	5	3	1	3	3	1	4	1	3	3	3	3	1	1	2	5	1	1	1
1371	25	2	1	2	2	2	1	4	1	4	4	4	4	4	2	4	2	4	1	2	2	2	2	4	1	2	4	1	3	1	4	2	1	2	4	2	4	2	2	2	3	2	2	2	2	4	0	1	1
1372	21	1	2	1	2	1	1	4	1	4	4	4	4	4	3	3	4	3	1	3	3	3	3	4	2	3	3	2	3	2	4	3	2	3	3	2	2	2	2	2	3	2	3	3	2	3	1	1	1
1373	28	2	2	2	2	1	1	4	1	4	4	4	4	4	2	2	2	2	1	2	3	3	3	4	1	1	3	2	3	2	3	2	3	3	3	3	3	2	4	4	3	3	3	3	3	3	1	1	1
1374	41	2	1	2	2	1	3	4	1	3	3	3	3	3	3	3	3	3	3	3	3	3	3	3	1	3	3	3	3	3	3	3	3	3	3	3	3	3	3	3	3	3	3	3	3	3	1	1	1
1375	22	2	1	3	2	1	1	4	1	4	3	2	3	4	2	2	2	2	1	2	2	2	4	4	2	2	4	4	4	2	4	3	2	4	4	2	2	2	2	3	4	2	2	2	1	3	1	1	1
1376	40	2	2	2	2	1	1	4	1	5	5	4	5	5	4	4	5	5	1	3	5	5	5	5	3	5	4	2	4	1	4	1	1	1	1	1	1	2	1	4	4	1	2	1	2	1	0	0	0
1377	41	2	1	2	2	1	1	4	1	4	4	4	4	4	3	3	4	3	2	3	4	3	3	4	2	2	4	2	2	2	5	3	4	4	4	4	4	1	4	4	4	4	2	3	4	5	1	1	1
1378	20	1	2	1	2	1	1	4	1	4	3	3	3	3	3	3	4	3	3	3	3	3	3	2	3	1	4	2	1	2	3	3	3	3	3	3	3	3	3	3	3	3	1	1	2	2	1	1	0
1379	34	2	1	2	2	1	1	4	1	4	4	4	4	4	4	4	4	4	4	3	4	4	4	4	4	4	4	4	4	4	4	4	4	4	4	4	4	4	4	4	4	4	4	4	4	4	0	0	0
1380	28	2	1	2	2	1	2	4	1	3	3	3	3	4	4	3	3	3	3	3	3	3	3	3	2	2	3	2	2	3	4	2	2	2	3	3	3	2	3	2	4	4	3	3	3	3	1	1	1
1381	43	2	1	2	2	1	2	4	1	4	5	4	3	5	4	1	5	2	1	4	4	3	4	1	2	2	4	2	3	2	4	3	2	2	3	2	4	2	3	4	4	2	2	3	3	2	1	1	1
1382	41	2	1	2	2	1	3	1	1	4	4	2	3	3	4	2	2	2	1	3	2	3	4	4	2	2	3	2	2	2	3	2	3	3	2	2	3	2	2	4	4	4	2	2	2	2	1	1	1
1383	37	2	1	2	2	1	3	4	1	3	3	3	3	3	4	3	3	3	1	2	2	2	2	4	2	2	3	2	3	2	4	3	3	3	3	3	3	2	3	2	3	2	3	2	2	3	0	1	1
1384	40	2	1	2	2	1	2	4	1	3	3	3	3	3	1	1	2	2	2	3	3	2	3	3	2	1	3	3	3	2	3	3	3	3	3	3	3	2	2	3	3	3	3	3	2	3	1	1	1
1385	34	2	1	2	2	1	1	4	1	4	4	4	3	4	2	4	4	2	1	4	2	2	3	4	4	3	3	2	2	3	3	3	2	4	2	2	2	2	3	2	3	2	2	3	2	2	1	1	1
1386	26	2	1	2	1	1	1	4	1	3	3	3	3	4	3	3	3	3	5	3	3	3	4	3	2	2	3	2	2	3	4	2	2	3	3	2	3	2	2	3	3	3	2	4	3	4	1	1	1
1387	33	2	1	2	2	1	2	4	1	3	3	3	3	3	4	3	3	3	3	1	4	3	3	3	1	2	1	4	3	3	4	4	4	4	4	3	3	3	4	3	4	2	4	2	4	4	0	1	0
1388	47	2	1	2	2	1	2	4	1	4	4	4	4	4	4	3	2	4	3	4	2	2	4	2	2	2	3	3	3	3	3	3	4	2	2	2	3	4	3	3	2	3	2	2	3	2	1	1	1
1389	49	2	1	2	2	1	4	5	1	3	3	3	3	3	4	3	3	3	3	3	3	3	3	3	2	1	4	2	4	3	4	3	3	4	4	4	3	4	3	3	3	2	3	3	3	2	1	1	1
1390	23	1	2	1	2	1	1	4	1	3	5	3	3	3	3	3	4	3	2	2	3	3	3	2	3	2	3	2	3	2	3	4	4	4	4	2	4	2	2	2	4	2	2	4	4	4	1	1	1
1391	36	2	1	2	2	1	2	4	1	4	4	4	4	4	4	4	4	4	4	3	4	4	4	4	4	4	3	4	2	2	3	3	3	3	3	2	3	3	3	3	3	3	2	2	3	3	1	1	1
1392	40	2	1	2	3	2	4	4	1	4	4	4	4	4	2	2	2	4	2	4	4	3	4	4	3	3	4	2	1	2	4	3	3	2	4	2	4	2	2	4	4	2	2	2	3	4	0	0	0
1393	44	2	2	2	2	1	4	4	1	5	5	4	5	3	3	3	3	3	3	3	3	3	3	3	1	3	3	3	3	3	3	3	3	3	3	3	3	3	3	3	3	3	3	3	3	3	0	0	0
1394	23	2	1	2	2	1	4	3	1	4	4	4	5	4	4	3	2	3	2	3	3	3	3	3	2	2	4	2	3	2	4	2	2	3	4	2	3	2	2	3	3	2	2	3	2	3	0	1	1
1395	45	2	1	2	2	1	4	4	1	4	4	4	4	4	4	4	2	2	2	3	3	3	2	4	2	2	4	2	4	2	4	2	2	2	4	2	3	2	2	4	4	2	2	2	3	4	1	0	0
1396	21	2	1	1	2	1	2	4	1	1	4	4	2	4	2	4	4	2	2	4	4	2	4	4	2	2	5	2	4	2	4	2	5	1	4	4	2	4	3	4	4	2	2	4	4	2	1	1	1
1397	40	1	2	2	3	2	4	4	1	4	4	4	4	4	3	3	4	2	1	4	4	3	4	4	2	2	4	3	2	2	4	5	3	3	3	2	4	3	3	3	4	2	3	4	3	4	1	1	1
1398	20	1	2	1	2	2	1	4	1	3	3	3	3	3	2	2	2	2	1	4	1	5	3	1	1	1	3	2	3	2	3	3	2	2	2	2	2	4	2	4	4	2	2	4	4	2	1	1	2
1399	45	1	2	2	2	2	4	4	1	4	4	4	4	4	2	2	2	2	2	2	2	2	2	2	2	2	4	2	2	2	4	2	2	2	4	2	2	2	2	4	4	2	2	4	2	4	1	1	0
1400	30	1	1	1	2	2	1	4	1	5	5	4	5	5	2	2	2	2	1	5	3	2	4	4	2	1	4	2	3	2	3	3	3	2	3	2	3	2	3	2	3	2	2	2	2	3	1	1	0
1401	30	1	2	2	3	2	2	4	1	4	4	4	4	4	4	4	4	4	4	4	4	2	4	4	3	4	4	4	3	4	3	2	3	4	3	4	4	3	4	2	2	2	2	4	3	4	1	2	1
1402	46	2	2	2	2	2	4	4	1	3	3	3	3	3	2	2	3	2	1	3	3	4	4	5	3	3	4	1	2	1	5	2	3	4	4	2	3	1	2	3	3	2	3	3	2	5	1	1	1
1403	40	2	1	2	1	1	4	4	1	4	4	4	4	4	2	2	2	2	2	4	4	3	2	4	1	2	4	1	3	1	5	1	1	3	5	1	5	1	1	5	5	1	1	5	5	5	0	1	0
1404	31	2	2	2	2	1	4	4	1	4	4	4	4	4	1	4	1	4	1	1	1	1	3	1	4	4	5	1	5	1	5	1	3	5	5	5	5	1	1	5	5	1	1	5	5	5	0	0	0
1405	33	2	1	3	2	2	2	4	1	4	4	4	5	4	4	3	2	3	2	3	3	3	3	3	2	2	4	2	3	2	4	2	2	3	4	2	3	2	2	3	3	2	2	3	2	3	0	1	1
1406	23	2	3	1	2	2	2	4	1	4	4	4	4	4	4	4	2	2	2	3	3	3	2	4	2	2	4	2	4	2	4	2	2	2	4	2	3	2	2	4	4	2	2	2	3	4	1	0	0
1407	31	2	2	2	1	1	2	4	1	1	4	4	2	4	2	4	4	2	2	4	4	2	4	4	2	2	5	2	4	2	4	2	5	1	4	4	2	4	3	4	4	2	2	4	4	2	1	1	1
1408	25	2	1	1	2	1	3	4	1	4	4	4	4	4	3	3	4	2	1	4	4	3	4	4	2	2	4	3	2	2	4	5	3	3	3	2	4	3	3	3	4	2	3	4	3	4	1	1	1
1409	44	2	1	2	1	1	4	4	1	3	3	3	3	3	2	2	2	2	1	4	1	5	3	1	1	1	3	2	3	2	3	3	2	2	2	2	2	4	2	4	4	2	2	4	4	2	1	1	2
1410	40	2	1	2	4	2	4	3	1	4	4	4	4	4	2	2	2	2	2	2	2	2	2	2	2	2	4	2	2	2	4	2	2	2	4	2	2	2	2	4	4	2	2	4	2	4	1	1	0
1411	35	2	1	3	2	2	2	4	1	5	5	5	5	5	2	2	2	2	1	5	3	2	4	4	2	2	4	2	3	2	3	3	3	2	3	2	3	2	3	2	3	2	2	2	2	3	1	1	0
1412	38	2	1	2	2	2	4	4	1	4	4	4	4	4	4	4	4	4	4	3	4	2	4	4	3	4	4	4	3	4	3	2	3	4	3	4	4	3	4	2	2	2	2	4	3	4	1	2	1
1413	25	2	1	1	2	1	2	4	1	3	3	3	3	3	2	2	3	2	1	3	3	4	4	5	3	3	4	1	2	1	5	2	3	4	4	2	3	1	2	3	3	2	3	3	2	5	1	1	1
1414	36	2	1	2	2	1	1	2	1	4	4	4	4	4	2	2	2	2	2	4	4	3	2	3	1	2	4	1	3	1	5	1	1	3	5	1	5	1	1	5	5	1	1	5	5	5	0	1	0
1415	32	2	1	2	2	1	2	4	1	4	4	4	4	4	1	4	1	4	1	1	1	1	3	1	4	4	5	1	5	1	5	1	3	5	5	5	5	1	1	5	5	1	1	5	5	5	0	0	0
1416	23	2	1	2	2	1	1	4	1	4	4	4	4	4	2	2	2	4	1	4	3	3	4	3	2	1	3	3	2	1	4	2	3	2	4	2	4	2	2	4	4	2	2	2	3	4	1	1	1
1417	25	1	2	1	2	2	1	3	1	3	3	3	3	3	2	1	1	1	1	1	1	1	4	1	1	1	5	1	3	2	5	1	1	2	5	2	4	2	2	3	3	2	2	2	2	4	0	1	1
1418	38	2	1	2	2	1	2	4	1	3	3	4	4	3	4	2	4	2	1	4	4	4	4	4	3	3	3	2	5	1	4	4	4	2	4	2	3	1	1	4	4	4	3	4	4	3	1	2	2
1419	39	2	1	3	2	1	2	4	1	4	4	4	4	4	2	2	3	3	2	3	3	4	4	3	2	3	3	3	4	3	4	3	3	3	4	3	4	3	2	3	4	3	2	4	3	4	1	1	1
1420	33	2	1	2	2	1	3	4	1	3	3	4	3	3	3	3	3	3	3	3	3	4	4	3	1	4	1	1	1	2	2	1	2	2	2	2	2	2	1	1	1	1	1	1	1	1	1	1	1
1421	41	2	1	2	2	1	3	4	1	5	5	3	3	3	3	2	2	2	1	2	2	2	2	4	2	1	4	2	4	2	4	1	3	3	3	2	4	2	1	4	4	2	2	2	3	5	1	1	0
1422	41	2	1	2	2	1	2	4	1	4	4	4	4	4	2	2	2	2	1	4	4	1	2	4	2	2	2	2	2	1	3	2	4	2	4	4	2	2	3	2	4	3	3	2	3	2	1	1	1
1423	41	2	1	2	2	1	4	4	1	3	3	3	3	3	4	3	2	2	1	3	3	3	3	3	2	1	4	3	3	2	4	3	3	3	3	2	3	2	2	3	3	2	3	3	3	3	1	1	1
1424	29	2	1	2	2	1	3	4	1	3	4	4	3	4	3	3	4	4	3	4	4	4	4	4	4	4	3	3	3	3	1	3	1	2	3	1	3	2	3	3	2	3	2	1	2	2	1	1	1
1425	33	2	1	2	2	1	2	2	1	4	4	4	4	4	2	4	3	2	1	5	5	2	4	3	2	2	3	2	1	3	3	5	1	3	3	3	3	5	3	4	5	3	4	4	1	2	1	1	1
1426	32	2	1	2	2	1	2	4	1	3	4	4	4	3	4	3	3	3	1	3	3	3	3	3	3	3	4	2	2	2	4	2	2	2	4	4	4	2	2	3	3	3	2	3	3	3	0	1	1
1427	28	2	1	2	2	1	3	4	1	1	4	2	3	4	1	1	4	2	2	2	3	1	3	4	2	1	2	1	2	1	3	4	2	2	2	2	2	1	2	2	1	1	2	1	3	4	1	0	0
1428	38	2	1	2	2	1	1	3	1	4	4	4	4	4	4	4	4	4	4	3	3	3	4	4	3	4	2	2	2	2	2	2	2	2	2	2	2	2	2	2	2	2	2	2	2	2	1	1	0
1429	38	2	1	2	2	1	3	3	1	4	4	4	4	4	4	4	4	4	4	3	4	4	4	4	4	4	2	2	2	2	2	2	2	2	2	2	2	2	2	2	2	2	2	2	2	2	0	0	0
1430	31	2	1	3	2	1	1	4	1	5	5	4	5	5	5	2	2	2	2	2	5	2	5	5	3	5	5	1	5	1	4	2	2	4	5	1	4	2	1	4	4	2	2	2	2	4	0	0	0
1431	39	2	1	2	2	2	4	3	1	4	4	4	4	4	2	3	4	2	2	3	3	3	4	4	2	2	4	2	3	2	4	2	2	4	4	2	4	2	2	4	4	2	4	2	4	4	1	1	1
1432	34	1	2	2	2	2	3	3	1	3	3	3	3	3	4	3	3	3	1	3	3	3	3	3	3	3	3	2	3	2	3	3	1	2	3	3	1	1	2	3	3	2	2	1	3	3	1	1	1
1433	22	2	2	1	2	2	2	3	1	4	4	4	4	4	2	2	2	2	1	2	2	2	2	2	2	2	3	2	2	2	4	2	2	2	3	2	3	3	2	3	3	2	2	3	3	3	1	1	1
1434	25	2	1	1	2	2	2	3	1	3	4	3	3	4	3	3	4	3	3	3	4	1	3	3	3	2	3	3	3	3	3	3	3	3	3	3	3	3	3	3	3	3	3	3	3	3	1	3	3
1435	38	2	1	2	2	2	4	4	1	4	4	4	4	4	2	3	4	2	1	2	3	3	4	5	2	2	4	1	4	1	4	4	4	3	4	3	2	1	1	3	4	2	2	4	4	4	1	1	0
1436	33	2	3	2	2	2	3	2	1	4	4	4	4	4	4	4	4	4	4	4	4	1	3	4	4	4	3	3	3	3	3	3	3	3	3	3	3	3	3	3	3	3	3	3	3	3	1	1	1
1437	42	2	1	2	2	2	3	3	1	4	4	4	4	4	2	3	3	2	1	2	3	3	4	5	2	1	3	2	3	2	3	2	3	3	3	2	3	2	2	3	4	2	2	3	2	3	1	1	0
1438	25	2	2	1	3	2	2	3	1	4	4	4	4	4	2	2	2	2	1	2	2	2	3	2	2	3	2	2	2	2	2	2	3	2	2	3	2	2	2	2	2	3	2	2	3	2	1	1	1
1439	24	2	2	1	3	2	1	2	1	4	4	4	4	4	2	1	2	3	1	4	4	3	3	4	2	3	3	1	2	3	4	4	5	5	5	4	2	4	2	4	4	2	4	5	4	2	1	2	0
1440	28	1	3	1	4	2	1	2	1	3	5	4	4	4	2	3	3	2	1	3	2	2	3	3	2	2	4	2	3	2	4	3	2	4	4	2	4	4	2	3	3	2	2	3	3	3	1	1	1
1441	28	2	3	2	4	2	2	3	1	4	4	4	4	4	2	2	2	2	1	2	2	3	4	3	3	3	4	2	3	3	4	3	2	4	3	3	4	4	2	3	4	2	2	4	2	3	1	1	1
1442	29	1	2	2	4	2	2	3	1	5	5	4	4	4	2	2	2	4	1	2	4	4	4	5	4	3	4	2	3	1	4	2	1	4	4	1	4	2	2	4	4	2	2	3	4	4	1	1	2
1443	26	2	3	1	4	2	1	4	1	4	4	4	4	4	2	2	2	2	1	2	3	3	3	5	2	3	5	2	3	2	5	3	2	2	5	4	4	2	2	4	4	2	2	4	2	4	1	1	1
1444	30	2	2	2	2	2	2	3	1	5	5	5	5	5	2	1	2	2	1	3	3	3	3	3	2	3	5	2	3	2	5	3	2	4	5	2	4	3	2	4	4	2	2	5	2	5	1	1	1
1445	38	1	2	2	4	2	4	4	2	4	4	4	5	4	2	4	2	2	2	2	3	3	4	3	3	3	5	3	4	4	4	4	4	3	4	4	4	3	2	3	3	3	3	3	4	3	1	1	1
1446	32	1	2	2	4	2	2	3	1	5	5	5	5	5	1	1	2	3	1	1	2	2	3	3	4	4	4	2	2	2	4	2	2	3	4	2	4	2	2	4	4	2	2	2	2	4	1	1	1
1447	28	1	2	2	2	2	3	4	1	5	5	5	5	5	1	1	1	1	1	1	1	1	5	2	4	4	5	1	1	1	5	1	1	3	5	1	5	1	1	5	5	1	1	5	1	5	0	0	0
1448	38	1	2	2	4	2	4	3	1	2	4	4	3	4	3	5	4	4	1	1	3	3	4	2	3	3	4	3	2	1	4	4	4	1	3	3	4	5	3	3	3	4	2	3	4	4	1	1	1
1449	33	1	2	3	3	2	3	4	1	5	5	5	5	5	1	1	1	1	1	5	3	5	5	3	5	5	3	3	3	2	5	2	2	2	2	1	2	2	2	4	4	2	2	4	2	5	0	0	0
1450	33	1	2	2	3	2	3	3	1	5	4	5	5	4	1	1	2	2	1	3	3	3	3	3	4	4	2	3	1	2	3	3	4	2	3	2	2	2	2	3	5	3	2	3	3	4	0	1	2
1451	38	1	2	2	3	2	3	3	1	5	4	5	5	5	2	2	2	2	1	3	2	2	4	3	2	2	2	4	2	2	4	4	4	4	4	1	3	2	2	4	4	3	2	4	1	2	1	1	1
1452	31	1	2	1	3	2	3	4	2	3	1	3	3	5	5	4	4	4	1	3	5	5	5	5	3	3	3	3	3	3	4	4	4	4	4	4	4	4	2	3	3	2	2	3	3	3	2	1	1
1453	29	2	3	2	3	2	1	2	1	5	5	5	5	5	1	1	1	1	1	3	3	4	4	2	2	4	3	2	2	1	5	3	5	4	4	4	3	1	1	4	4	2	2	4	3	3	1	1	1
1454	26	2	3	1	3	2	1	3	1	3	3	2	4	4	2	2	2	2	1	3	2	4	3	3	2	4	3	1	2	2	3	4	1	3	3	3	3	2	2	4	3	2	2	3	2	3	0	1	1
1455	26	1	2	1	3	2	2	3	1	5	5	5	5	5	1	1	1	1	1	1	1	1	1	1	5	5	5	1	1	1	5	1	1	5	5	1	5	1	1	5	5	1	1	1	1	5	0	0	0
1456	36	1	2	2	4	2	3	5	2	5	5	5	5	5	1	1	1	2	1	2	2	2	4	2	3	3	4	1	3	1	5	4	2	3	5	1	4	1	1	4	4	1	1	2	2	5	0	0	0
1457	29	1	2	1	4	2	1	2	1	4	4	4	4	5	2	2	2	2	1	3	3	3	3	2	2	3	4	2	3	1	3	2	2	4	4	1	3	2	2	3	4	2	2	3	2	3	0	0	0
1458	31	1	2	3	4	1	2	3	1	5	5	5	5	5	1	1	1	1	1	1	1	1	4	2	3	4	5	3	1	5	5	1	1	5	5	1	5	1	1	5	5	1	1	4	1	5	0	0	0
1459	23	1	2	1	3	2	2	2	1	5	5	5	5	5	1	2	2	3	1	4	4	4	4	4	4	4	5	1	1	1	1	1	1	1	1	2	2	2	1	3	3	2	3	3	3	3	1	1	0
1460	32	1	2	2	2	1	2	5	2	4	4	4	4	4	2	3	2	2	1	3	2	2	3	2	4	4	4	2	4	2	4	2	2	4	4	2	4	2	4	4	4	3	4	4	4	4	1	1	1
1461	37	1	2	2	4	2	4	2	1	5	5	5	5	5	2	3	4	3	3	3	3	4	4	3	3	3	3	2	3	3	2	3	4	3	3	2	3	3	2	3	3	3	2	3	3	2	1	1	1
1462	29	1	2	1	3	2	3	4	1	4	4	4	4	4	2	2	2	2	1	3	3	3	4	4	3	3	3	3	3	3	3	3	3	3	3	3	3	3	3	3	3	3	3	3	3	3	3	0	0
1463	38	1	2	2	4	2	4	4	1	5	5	5	5	5	2	2	2	2	2	1	4	4	4	4	4	4	2	2	2	2	2	2	2	2	2	3	3	3	2	3	3	3	2	2	2	2	0	1	1
1464	30	1	2	2	2	2	1	2	1	5	5	5	5	5	1	1	1	1	1	1	4	2	2	2	5	5	5	1	1	1	5	1	1	1	5	1	5	1	1	5	5	1	1	5	2	5	0	0	0
1465	28	1	2	2	3	2	3	3	2	5	5	5	5	5	1	1	1	1	1	1	1	1	3	3	2	2	4	2	4	2	4	4	2	4	3	2	3	2	2	4	2	4	2	2	4	3	1	1	1
1466	28	1	2	3	4	2	3	2	1	4	4	4	4	4	2	2	2	2	1	2	2	2	4	2	3	3	4	1	2	2	4	2	3	3	4	2	4	2	3	3	3	1	2	2	4	2	1	1	1
1467	25	1	3	1	3	2	2	2	1	4	4	3	4	3	3	3	3	2	1	3	2	2	2	2	3	3	3	3	3	2	3	3	3	3	3	3	3	3	3	3	3	3	3	3	3	3	3	2	2
1468	38	1	2	2	4	2	4	4	1	5	4	5	5	4	4	3	3	3	4	3	3	5	5	5	4	4	4	4	4	5	4	4	4	4	4	1	4	1	2	4	4	4	4	3	4	4	0	0	0
1469	40	1	2	2	4	2	4	2	1	5	5	5	5	5	2	2	2	2	1	2	3	3	4	2	2	3	5	1	3	1	5	1	2	2	4	2	3	4	2	4	4	2	2	4	4	4	0	0	1
1470	32	1	2	2	4	2	3	2	1	5	5	5	4	5	4	3	1	2	1	5	3	2	3	3	3	3	3	2	3	2	3	3	3	3	4	2	3	2	2	4	5	2	2	5	2	4	1	0	0
1471	34	1	1	2	2	1	4	2	1	5	5	5	5	5	2	2	2	2	1	3	3	3	3	3	3	3	4	2	4	2	4	3	2	3	3	2	4	2	2	3	3	3	2	3	3	3	0	0	0
1472	31	1	2	1	4	2	1	2	1	5	5	5	4	4	2	2	2	2	3	2	3	3	2	3	4	4	5	1	4	1	5	2	1	5	5	1	5	1	1	5	5	2	1	4	2	4	0	1	0
1473	32	1	2	2	3	1	3	2	2	4	4	4	4	4	4	4	4	4	4	4	4	4	4	4	4	4	3	2	2	2	2	2	2	2	2	2	2	2	2	2	2	2	2	2	2	2	1	1	2
1474	40	1	2	2	4	2	4	2	1	4	4	4	4	4	2	2	2	2	5	3	3	2	4	3	3	3	4	2	2	1	3	4	2	3	3	2	3	3	2	3	3	2	2	2	3	3	2	2	1
1475	24	1	2	1	4	2	2	3	2	4	4	4	4	4	2	5	5	2	1	4	5	3	3	5	3	3	4	2	4	1	4	2	4	4	4	4	4	4	2	4	4	4	2	4	2	4	0	1	2
1476	29	1	2	1	2	1	2	4	2	5	3	3	3	3	4	3	3	3	3	3	3	3	3	3	3	3	4	2	3	2	3	3	3	3	3	2	3	3	2	3	3	2	2	3	2	3	2	2	2
1477	28	1	2	1	2	1	2	2	2	5	5	5	5	5	1	1	1	1	2	2	2	5	5	5	2	2	5	1	5	1	5	1	1	2	4	4	4	2	2	5	5	2	2	4	4	5	1	1	1
1478	22	1	2	1	2	1	1	4	2	4	4	4	4	4	2	2	2	5	5	5	5	2	4	4	5	5	5	5	3	1	5	4	5	3	5	1	3	4	1	5	5	1	1	2	4	4	0	1	1
1479	42	1	1	2	1	1	4	2	1	3	4	3	3	4	2	2	3	3	1	3	3	3	3	2	2	2	4	2	4	1	4	2	2	5	4	1	4	2	2	4	4	2	2	3	2	4	1	1	1
1480	35	1	2	2	3	2	1	4	2	5	5	5	5	3	2	2	2	2	2	4	2	3	4	4	2	2	3	3	1	2	4	4	3	2	2	2	4	4	2	3	2	4	2	2	3	2	1	1	1
1481	32	1	2	2	3	1	3	2	2	4	4	4	4	4	1	2	2	2	2	2	2	2	3	2	3	3	4	1	2	1	4	2	2	3	4	2	4	2	2	4	4	2	2	2	2	4	0	0	0
1482	30	2	2	2	2	1	3	3	1	5	5	5	5	5	2	2	2	2	1	2	3	4	4	3	2	2	2	4	1	2	2	2	4	2	2	3	3	3	4	2	4	4	2	2	4	4	1	1	1
1483	38	1	2	3	4	2	2	3	1	5	5	5	5	5	5	1	1	1	1	1	2	1	2	2	4	4	5	4	2	1	5	3	4	3	5	1	5	1	2	3	5	2	1	5	3	5	0	0	0
1484	24	1	1	1	3	1	1	4	2	5	5	5	5	3	4	3	3	2	3	2	3	5	5	5	3	3	3	3	3	2	3	3	3	3	3	4	4	4	2	3	3	3	2	4	4	4	1	1	1
1485	34	1	2	2	3	2	4	4	2	4	4	3	4	5	4	3	4	3	2	3	3	2	3	3	4	4	3	2	2	2	3	3	2	2	3	2	2	2	2	3	3	2	2	2	4	4	1	1	1
1486	29	2	2	2	3	2	3	1	1	5	5	5	5	4	3	3	2	2	3	5	3	4	5	3	2	2	3	3	2	2	2	3	2	3	3	3	3	3	3	3	3	2	2	3	2	3	0	0	0
1487	32	2	2	2	3	1	1	5	2	5	5	5	5	5	1	1	1	1	1	1	1	1	1	1	5	5	5	1	3	1	5	2	1	4	5	1	5	1	1	5	5	2	1	5	2	4	0	0	0
1488	24	2	2	2	1	1	2	1	2	2	2	1	2	3	4	4	4	3	1	3	3	3	3	2	1	2	2	4	2	4	2	4	4	3	4	5	1	3	3	2	4	3	3	3	4	3	2	2	2
1489	29	1	2	3	3	2	3	5	2	5	5	5	5	5	3	5	3	2	2	5	2	2	5	4	2	2	3	1	1	1	5	1	3	4	3	3	3	2	2	5	5	2	2	4	2	5	0	1	1
1490	29	1	2	3	3	2	2	5	2	4	4	4	4	4	2	2	3	2	3	2	2	2	3	5	2	3	2	3	1	2	4	4	3	3	2	2	3	3	2	3	4	3	2	2	3	3	1	1	3
1491	47	1	2	2	3	2	4	4	2	5	4	3	4	4	1	2	4	3	3	3	3	5	4	4	2	2	4	3	2	1	4	4	3	3	3	2	3	2	3	4	2	3	1	2	5	1	1	1	2
1492	34	1	2	2	2	1	4	3	2	4	4	4	4	3	2	2	3	2	3	2	3	3	3	3	4	4	3	2	2	2	3	3	3	2	2	3	3	2	3	2	4	2	3	3	4	3	1	1	1
1493	29	2	2	3	2	1	1	5	2	5	5	5	5	5	2	2	3	2	2	5	5	5	5	5	4	2	4	2	2	1	4	4	4	3	5	2	5	2	2	3	2	2	2	3	3	5	1	1	1
1494	38	1	2	2	4	2	4	5	2	1	1	3	1	1	3	2	1	2	1	3	3	1	1	3	3	3	3	1	3	2	3	3	2	2	3	1	2	2	2	2	2	2	2	2	2	2	0	1	1
1495	51	1	1	2	2	1	4	2	2	3	4	3	2	4	2	3	2	2	1	3	3	2	3	1	2	2	4	2	1	2	4	3	3	3	3	4	3	2	3	4	4	2	3	2	3	4	1	2	1
1496	29	1	2	3	2	2	3	3	2	5	5	5	5	5	5	5	5	2	3	2	3	2	5	4	3	3	3	3	1	3	2	4	4	2	2	2	2	3	3	3	2	2	3	2	2	3	1	1	1
1497	25	1	2	1	2	1	2	5	2	5	5	3	3	3	4	3	3	3	1	4	4	4	5	5	2	2	5	1	3	1	4	3	2	1	2	1	4	1	1	4	3	2	3	3	4	4	0	1	1
1498	31	2	1	1	2	1	2	5	2	3	4	1	4	3	2	4	4	3	3	4	4	4	4	2	3	3	1	5	1	2	3	5	5	3	1	5	2	2	5	4	4	5	5	3	5	2	1	2	2
1499	32	1	2	1	4	2	1	3	1	5	5	5	5	4	2	2	2	2	2	2	4	4	4	5	2	2	2	3	2	2	3	3	3	3	3	2	2	2	2	3	5	2	3	2	4	4	1	1	1
1500	33	1	2	3	3	1	3	4	2	4	5	1	3	5	5	3	4	3	3	5	5	5	5	5	1	1	5	2	3	1	5	3	1	5	4	1	2	3	2	4	5	1	3	5	5	5	1	1	1
1501	23	2	2	1	2	1	1	4	2	4	4	4	4	4	2	2	2	2	1	3	3	2	3	3	2	2	4	2	4	1	4	2	2	3	4	4	4	2	2	4	4	2	2	3	2	3	0	1	1
1502	35	1	1	2	2	1	4	3	2	4	4	4	4	4	4	4	4	4	4	4	4	4	4	4	4	4	5	5	5	5	5	1	1	5	5	1	4	1	1	4	4	3	4	4	4	5	0	0	0
1503	23	1	1	2	3	2	2	4	2	5	5	5	5	5	1	1	1	1	1	2	3	3	4	2	3	3	4	3	1	2	2	2	3	2	3	2	3	3	2	3	3	2	3	2	3	3	0	1	0
1504	24	1	2	1	2	2	3	3	2	3	3	2	2	3	2	2	4	3	2	3	3	3	2	4	2	3	2	2	3	2	2	2	3	2	2	3	2	2	2	2	3	2	2	2	2	2	2	2	3
1505	33	2	2	2	2	1	4	5	2	3	4	3	3	3	4	4	3	3	5	4	3	3	3	5	2	3	3	2	3	2	4	4	3	4	4	2	3	2	3	3	4	2	4	3	3	3	1	1	1
1506	26	1	2	1	3	1	1	5	2	4	4	4	4	3	2	2	2	2	2	4	3	3	3	4	2	2	3	2	2	2	3	3	3	2	4	2	4	2	2	3	3	2	2	2	3	3	1	1	1
1507	29	1	2	2	3	1	3	4	2	5	5	5	5	5	1	1	4	1	1	5	5	3	4	5	2	2	3	2	3	2	4	2	4	4	4	2	4	2	2	5	5	2	2	3	5	4	1	1	1
1508	37	2	2	2	4	2	2	3	1	5	5	3	3	5	1	2	2	5	1	3	2	2	3	2	4	4	4	1	4	3	5	4	1	5	5	2	4	1	1	4	5	2	1	5	2	5	0	1	1
1509	24	1	2	1	3	2	2	3	1	4	4	3	3	3	2	1	2	3	1	3	3	4	5	3	2	3	1	1	1	1	1	5	5	1	1	1	1	3	1	4	1	2	2	4	5	2	3	1	0
1510	36	1	2	2	4	2	4	4	1	5	5	5	5	5	5	1	1	1	1	1	1	1	4	3	5	5	5	1	5	1	5	1	1	5	5	1	5	1	1	5	5	1	1	5	1	5	0	0	0
1511	31	1	1	2	3	1	3	5	2	4	4	4	4	4	2	2	2	4	1	3	2	2	2	4	3	3	5	2	4	2	4	4	3	2	3	2	3	2	2	3	4	2	3	2	4	4	1	1	1
1512	33	1	2	2	4	2	4	4	2	5	5	5	5	5	5	1	2	2	2	2	2	2	4	2	4	4	5	1	3	1	5	2	1	4	5	1	5	1	1	5	5	1	1	4	1	5	0	0	0
1513	31	1	2	2	4	2	2	2	1	3	4	3	3	4	4	4	3	3	1	5	5	4	5	3	4	2	3	1	2	1	3	2	3	2	2	1	2	2	2	4	5	2	2	3	3	4	1	1	1
1514	23	2	2	3	2	1	1	5	2	3	4	4	3	5	3	2	3	2	3	3	3	3	3	5	1	2	4	2	2	3	3	4	4	3	3	4	3	3	4	4	3	3	2	3	4	3	1	1	2
1515	31	1	2	1	3	1	4	5	2	4	4	4	4	4	2	2	2	4	2	4	2	2	2	2	2	4	2	4	2	2	3	4	4	3	3	2	3	2	2	3	3	4	3	3	3	3	1	1	1
1516	30	1	1	1	2	1	3	5	2	5	5	5	5	5	2	3	2	1	3	5	5	5	5	4	2	2	5	2	2	2	4	4	4	4	2	2	4	4	2	4	4	2	4	4	4	4	0	1	1
1517	46	1	1	2	2	1	4	2	2	5	5	5	5	5	2	2	2	2	2	5	2	2	5	2	2	2	5	1	5	1	5	1	1	1	1	1	5	1	1	5	5	1	1	1	1	5	0	0	0
1518	30	2	2	2	2	1	4	4	2	4	4	4	4	4	2	2	2	2	2	4	3	2	4	2	4	4	4	1	4	2	4	2	2	4	4	1	5	2	2	4	5	2	2	4	1	5	1	1	1
1519	33	2	3	2	4	2	2	2	1	4	4	4	4	4	2	2	2	3	1	3	4	3	4	3	2	3	4	2	2	2	3	2	2	4	2	2	3	1	3	3	4	2	2	5	1	2	2	2	1
1520	37	2	2	3	2	2	1	3	2	4	4	4	3	4	4	3	3	3	1	3	3	3	4	4	3	3	4	2	3	1	3	3	3	3	3	3	3	2	2	3	3	2	2	3	3	3	0	1	2
1521	32	2	2	2	2	1	4	4	2	5	5	5	5	5	2	1	4	5	1	5	2	2	4	2	3	3	3	3	3	3	3	3	3	3	3	3	3	3	3	3	3	3	3	3	3	3	1	1	0
1522	31	1	2	2	3	2	4	5	2	4	3	3	4	4	5	3	4	5	3	3	5	4	5	5	2	2	3	2	2	2	3	3	3	3	3	3	3	2	3	3	3	3	3	3	3	3	1	1	1
1523	24	1	2	1	4	2	2	5	2	5	5	5	5	4	1	2	2	1	2	1	2	2	5	2	4	3	4	3	4	2	3	3	3	3	4	3	5	3	2	3	3	3	3	4	2	4	2	1	1
1524	25	1	2	1	3	1	2	5	1	3	4	4	3	4	2	2	2	3	3	4	3	3	2	4	3	2	4	1	1	1	4	4	2	2	1	1	4	2	1	4	4	1	1	1	1	2	1	1	1
1525	30	1	2	2	4	2	2	2	1	4	5	4	4	5	1	5	2	2	1	2	2	2	3	1	3	3	5	1	4	1	5	3	2	3	4	1	4	3	2	3	3	1	2	4	3	4	1	1	0
1526	33	1	2	3	3	1	4	1	2	3	3	3	3	3	3	3	3	3	3	2	2	2	3	3	3	3	3	3	3	3	3	3	3	3	3	3	3	2	3	3	3	3	3	2	3	3	2	1	1
1527	28	1	2	1	2	1	1	5	2	3	3	2	2	2	3	3	5	3	3	2	3	3	4	5	2	1	4	1	1	3	4	4	4	4	4	1	3	5	1	4	5	3	1	3	1	3	0	1	1
1528	38	1	2	3	4	2	4	4	2	3	3	3	3	4	3	2	3	2	3	4	4	2	4	4	4	4	3	2	2	2	4	3	2	2	3	2	2	3	2	3	3	2	2	3	3	3	1	1	0
1529	24	1	2	1	3	2	1	2	2	5	5	4	3	3	4	4	3	1	2	2	2	2	4	2	2	4	4	3	2	2	4	4	3	2	4	1	4	4	2	4	1	2	2	4	2	5	1	1	1
1530	33	1	2	2	3	2	4	4	2	4	4	4	4	4	3	2	3	2	2	4	3	3	3	3	2	2	3	2	3	3	3	3	3	3	3	3	3	3	2	3	3	2	2	3	2	3	1	1	1
1531	34	1	2	2	2	2	2	4	2	4	4	4	4	4	4	4	4	4	4	4	4	5	4	5	5	5	1	1	1	1	1	1	1	1	3	1	2	1	1	1	1	2	1	1	1	1	1	1	1
1532	33	1	2	2	3	2	1	1	2	5	5	5	5	5	1	1	1	2	3	3	4	3	5	4	3	3	5	1	4	1	5	1	2	4	5	1	5	1	1	5	5	1	1	5	3	3	0	0	1
1533	29	2	1	3	2	1	1	4	2	4	5	4	5	5	1	2	2	2	2	4	2	2	2	2	2	1	4	1	2	1	4	4	4	1	4	2	4	2	2	3	4	1	2	4	2	4	0	1	0
1534	47	1	2	2	3	2	4	4	2	5	5	5	5	5	2	2	2	2	4	3	4	3	4	5	2	3	5	1	3	1	5	2	1	3	5	1	5	3	1	5	5	2	1	4	2	4	0	0	1
1535	29	1	2	1	2	1	2	4	2	5	5	5	5	5	2	2	2	2	2	3	4	3	4	4	3	3	4	2	3	1	5	2	2	3	5	2	4	4	2	4	4	2	2	4	2	5	0	1	1
1536	35	1	1	2	3	2	4	3	2	5	4	5	5	5	1	2	2	2	1	4	2	2	4	2	4	4	4	2	3	2	5	2	2	4	4	1	3	2	2	4	5	1	1	5	3	4	1	1	0
1537	39	1	2	2	4	2	4	3	1	5	5	5	5	5	1	1	1	2	2	1	2	3	3	2	3	3	4	2	2	2	3	4	2	3	4	2	3	2	1	3	4	1	2	3	3	5	1	1	0
1538	31	2	2	2	2	1	3	2	1	4	4	4	4	4	4	2	4	2	1	4	4	4	3	2	2	2	4	2	4	2	4	4	4	4	4	4	3	2	4	4	4	2	3	4	2	4	1	0	0
1539	25	1	1	3	2	2	1	5	2	5	5	3	3	3	2	2	2	2	3	3	4	4	3	5	1	1	4	2	1	1	4	3	3	2	3	2	3	3	2	3	3	2	2	2	2	3	1	1	1
1540	33	1	2	2	2	1	3	3	2	5	5	5	5	5	1	1	1	1	1	1	1	1	1	1	5	5	5	1	2	1	5	4	4	1	5	1	5	1	1	5	5	1	1	5	2	5	0	0	0
1541	33	1	3	2	4	2	3	3	1	5	5	5	5	5	2	2	2	3	1	3	4	5	5	3	4	4	4	2	2	2	2	2	2	2	2	2	4	2	3	3	3	3	3	3	3	4	1	1	0
1542	30	1	2	3	4	2	3	4	2	4	4	3	4	4	3	4	3	2	4	5	5	4	5	3	2	3	2	4	1	3	2	3	4	2	3	4	3	2	3	4	4	3	4	2	5	2	2	1	2
1543	29	1	2	1	4	2	3	4	2	3	4	3	3	3	4	3	3	3	5	4	3	5	5	5	2	3	2	4	2	4	2	5	4	3	2	4	4	4	5	2	2	5	4	2	4	2	2	2	1
1544	46	1	2	2	4	2	4	3	2	5	5	5	5	5	1	2	2	1	1	5	2	2	3	3	4	4	5	1	4	1	5	2	2	5	5	2	4	1	1	4	5	1	3	3	4	2	0	0	0
1545	34	1	2	2	3	2	4	3	2	4	4	4	4	2	2	2	2	2	2	2	2	3	3	2	2	2	5	5	5	5	5	5	5	5	5	5	5	3	1	3	5	2	1	2	2	5	0	0	0
1546	33	1	2	2	4	2	4	3	2	5	5	5	5	4	2	2	2	3	3	3	3	2	3	2	3	3	3	3	2	2	3	4	2	3	2	2	3	3	3	3	3	3	2	2	2	2	1	1	3
1547	35	1	1	3	3	1	2	4	2	4	5	4	4	5	3	3	3	4	1	5	3	5	5	3	3	3	4	2	3	2	5	2	4	4	4	1	5	1	2	4	4	4	2	2	3	4	0	1	1
1548	37	1	2	2	4	2	4	4	1	5	5	5	5	5	5	1	2	4	1	4	4	4	3	3	4	4	3	4	4	4	5	4	4	4	4	1	5	1	4	4	5	3	4	3	3	5	0	1	3
1549	30	2	1	2	2	1	3	1	2	4	4	4	4	4	2	2	2	2	2	2	2	2	2	2	2	2	2	2	2	2	2	2	2	2	2	2	2	2	2	2	2	2	2	2	2	2	0	0	0
1550	38	2	2	2	2	1	4	3	1	5	5	5	5	5	5	4	4	4	4	5	4	4	4	4	4	4	1	1	1	1	1	1	1	1	1	1	1	1	1	1	1	1	1	1	1	1	0	0	0
1551	31	1	2	1	2	1	4	2	2	4	4	4	4	4	4	4	4	3	3	3	3	3	3	3	3	3	3	3	3	3	3	3	3	3	3	3	3	3	3	3	3	3	3	3	3	3	1	1	1
1552	40	1	1	3	3	1	4	3	2	4	4	4	3	3	2	3	3	3	1	4	2	2	5	3	3	3	4	4	4	2	4	4	4	3	3	2	2	2	2	3	3	2	3	3	3	3	1	1	2
1553	27	1	1	3	2	2	3	4	2	3	3	3	3	3	3	3	3	3	3	3	3	3	3	2	3	3	3	2	2	2	3	3	3	3	3	3	3	2	2	3	3	2	3	2	3	3	0	1	1
1554	36	1	2	2	4	2	3	3	1	5	5	5	4	4	2	2	2	5	1	4	4	4	4	2	2	2	3	2	2	2	3	3	2	3	2	2	2	2	2	3	3	2	2	3	3	3	1	1	1
1555	37	1	2	2	4	2	4	1	1	5	5	5	5	5	1	1	1	1	1	1	2	2	4	5	3	3	4	2	3	4	4	4	2	4	2	4	2	4	4	2	3	4	4	3	4	3	1	1	1
1556	38	1	2	2	4	2	4	3	1	5	5	5	5	5	2	2	2	2	2	2	2	2	3	4	4	2	2	2	2	1	4	3	3	4	4	2	4	3	2	3	5	3	2	4	4	5	0	1	1
1557	30	1	2	2	4	1	1	5	2	4	4	4	4	5	2	2	2	3	3	4	3	3	4	4	3	3	4	2	2	2	3	2	2	2	2	1	2	2	2	3	3	3	3	3	3	4	1	1	2
1558	35	1	2	2	2	1	3	3	2	4	4	3	3	4	2	3	2	3	3	4	3	3	4	3	2	2	3	2	2	1	3	3	3	3	3	3	3	3	3	2	2	3	2	2	3	3	1	1	1
1559	34	2	2	2	2	1	1	3	2	5	5	5	5	5	1	1	1	1	1	1	1	1	1	1	5	5	5	1	5	1	5	2	5	1	5	1	5	1	1	5	5	1	1	5	1	5	0	0	0
1560	25	2	1	3	2	1	1	5	2	3	4	3	3	5	4	3	5	3	3	3	4	4	4	3	3	3	1	4	1	5	4	4	4	4	4	4	4	4	4	1	4	4	4	4	4	3	1	1	1
1561	32	1	1	3	3	2	3	3	2	5	5	4	5	4	2	2	3	3	2	3	2	2	4	4	3	3	3	2	2	2	4	3	3	3	3	2	3	2	2	3	4	2	3	3	3	3	1	1	2
1562	31	1	1	1	3	2	3	4	2	5	5	5	5	5	2	1	1	2	1	3	2	1	3	1	3	3	4	1	1	1	4	3	2	2	3	2	3	1	2	4	2	1	2	2	2	5	0	0	1
1563	35	1	2	2	3	1	4	4	2	5	5	5	5	5	1	1	1	2	1	1	3	4	4	2	2	4	4	2	4	1	4	3	2	3	4	1	4	2	2	4	4	2	2	4	2	2	1	1	0
1564	27	2	1	2	2	1	3	5	2	5	3	5	5	5	2	2	2	1	1	3	3	3	3	3	2	2	3	2	2	4	4	4	2	4	3	2	2	2	3	4	3	4	4	3	4	2	1	1	1
1565	24	1	2	2	4	1	3	5	2	5	5	5	5	5	1	1	1	3	1	3	1	1	3	1	3	3	4	1	4	1	4	4	3	3	4	2	4	4	1	4	4	1	3	4	4	4	0	0	0
1566	25	2	1	1	2	1	2	5	2	5	5	5	5	5	5	5	5	2	1	3	2	3	2	3	2	4	5	1	4	1	5	5	2	5	5	2	5	2	2	4	4	2	2	2	2	4	0	0	0
1567	44	2	2	2	3	1	4	1	2	5	5	5	5	5	1	1	1	1	1	1	1	1	1	1	1	1	5	1	5	1	5	1	1	5	5	1	5	1	1	5	5	1	1	5	1	5	0	0	0
1568	31	2	2	2	1	1	2	2	1	4	4	4	4	4	2	3	3	2	1	2	2	2	2	2	4	4	3	3	2	2	4	3	3	4	4	2	3	4	3	4	4	2	3	3	3	2	1	1	0
1569	33	1	2	2	2	1	3	4	2	5	5	5	5	5	1	2	1	1	4	4	4	4	4	4	2	3	3	2	2	1	5	2	2	2	5	2	5	2	1	4	5	1	2	3	2	4	0	0	1
1570	38	2	2	2	2	1	4	4	2	4	4	4	4	4	2	2	2	2	2	5	2	2	3	2	4	4	3	2	3	2	3	3	3	3	4	3	3	2	2	4	4	3	3	3	4	3	0	0	2
1571	30	1	2	2	2	2	3	2	2	5	4	3	5	3	2	2	2	2	3	4	4	2	3	2	3	3	2	5	1	1	3	3	5	3	2	1	3	3	4	4	5	5	5	1	4	4	1	0	1
1572	29	1	2	1	4	2	3	4	1	4	5	3	3	3	2	3	3	3	3	3	5	5	5	5	3	3	3	3	3	1	5	2	3	1	4	1	5	2	2	2	2	3	2	4	4	3	1	1	1
1573	30	1	1	2	3	1	3	5	2	5	5	5	5	5	2	2	2	3	2	3	3	3	4	4	3	3	2	2	2	2	3	3	3	2	3	2	3	2	2	3	3	3	3	2	3	2	1	1	1
1574	21	1	2	1	2	1	1	5	2	4	4	4	4	4	4	4	4	4	1	4	3	4	4	4	4	4	3	3	3	1	3	2	4	4	4	4	4	1	2	4	4	2	2	2	2	4	0	0	0
1575	26	1	2	1	2	1	2	4	2	4	4	4	4	4	3	3	4	3	4	3	3	3	4	4	2	2	4	2	2	2	4	4	4	2	2	2	3	2	4	2	2	4	3	2	4	3	1	1	2
1576	34	1	2	2	4	2	4	3	1	5	5	4	5	4	2	2	2	2	1	2	3	3	4	4	3	4	3	2	1	2	4	2	3	2	3	2	4	2	2	4	5	2	1	4	4	3	0	1	1
1577	32	1	2	2	2	2	4	3	2	3	3	2	2	4	5	3	5	5	3	2	4	4	5	4	2	2	3	4	2	2	3	3	3	3	3	2	2	3	2	3	3	3	3	3	3	3	1	1	1
1578	27	2	2	3	2	1	2	5	2	4	4	4	4	4	3	2	3	1	1	3	2	2	4	3	2	3	4	2	3	2	4	2	2	2	3	2	2	2	2	4	4	2	2	4	2	4	1	0	0
1579	31	1	2	2	4	2	1	3	1	4	4	3	3	5	3	4	3	4	1	2	3	2	3	3	2	3	4	1	2	4	4	4	2	4	3	1	3	5	4	3	3	2	2	4	2	4	2	1	0
1580	37	1	2	2	4	2	4	4	1	4	4	3	4	4	2	2	2	2	1	2	2	2	2	3	3	3	4	2	3	2	5	2	2	2	5	2	4	2	2	4	4	2	2	4	2	4	0	0	1
1581	27	1	2	3	2	1	3	5	2	4	4	4	4	4	4	4	4	1	1	4	4	4	4	5	1	1	4	1	1	1	4	4	4	4	4	1	4	1	1	4	4	4	1	4	1	4	0	0	0
1582	30	1	1	2	2	1	2	5	2	4	4	4	4	4	4	4	4	4	1	4	3	4	4	4	1	1	4	2	2	1	4	2	2	2	4	4	4	1	2	4	4	3	2	2	3	4	1	1	1
1583	34	1	2	1	3	2	4	2	2	4	5	4	5	5	1	2	4	4	2	3	4	4	4	3	3	4	4	1	2	1	4	1	1	1	1	1	4	1	2	4	5	1	1	1	1	4	0	0	0
1584	30	2	1	2	2	1	1	4	2	4	5	5	5	5	2	2	2	2	1	4	1	1	4	2	2	2	4	2	3	1	4	4	2	2	4	2	4	2	2	3	4	2	2	4	2	4	0	1	0
1585	29	1	2	3	3	1	1	5	2	5	5	5	5	5	1	1	3	3	3	3	4	3	3	5	4	4	4	4	4	2	5	3	2	5	5	2	5	1	1	5	5	2	2	5	3	4	1	1	1
1586	26	2	1	3	3	1	3	4	2	4	4	4	4	4	2	2	2	2	2	4	2	2	4	2	2	2	4	1	3	2	4	4	2	2	4	4	4	2	4	4	4	2	2	4	2	4	0	1	0
1587	29	2	1	2	2	1	1	4	2	4	4	4	4	4	2	2	2	2	2	4	2	2	4	2	2	2	4	1	3	1	5	2	2	2	4	2	4	1	2	4	4	2	2	4	2	4	0	1	0
1588	26	2	1	2	2	1	3	4	2	4	4	4	4	4	2	2	2	2	2	4	2	2	4	2	2	2	4	1	3	1	4	4	2	2	4	4	4	2	4	4	4	2	2	4	4	4	0	1	0
1589	31	1	1	2	2	2	3	3	2	3	5	5	5	4	3	4	4	3	1	3	3	3	3	3	3	3	3	3	3	3	3	2	3	3	3	3	3	2	2	3	3	3	3	3	3	3	1	0	2
1590	31	2	1	1	3	1	2	5	2	4	4	4	4	4	2	2	2	3	1	4	2	3	4	4	2	2	4	2	2	2	4	4	4	4	4	2	4	2	2	4	4	2	2	3	4	4	0	1	0
1591	26	1	2	1	3	2	2	3	1	1	1	1	1	1	1	1	1	1	1	1	1	1	5	1	3	3	5	5	1	1	1	1	5	3	1	1	5	3	1	1	1	5	5	1	5	3	0	0	0
1592	25	2	2	2	2	1	3	4	2	5	5	5	5	5	5	3	2	2	1	5	3	2	3	4	2	3	2	2	1	2	4	4	4	4	3	4	4	2	3	2	3	3	3	2	2	3	1	1	1
1593	30	2	1	2	2	1	3	5	1	5	5	5	5	5	1	1	1	1	1	4	1	3	4	1	1	1	4	2	2	2	4	2	1	2	4	2	3	2	3	4	4	3	3	2	2	4	0	1	0
1594	33	1	2	2	2	1	3	4	1	4	4	4	4	5	3	3	3	3	1	3	3	3	3	3	2	2	3	3	3	3	3	3	3	3	3	3	3	3	3	3	3	3	1	2	1	3	1	1	1
1595	31	1	1	2	3	1	1	5	2	5	5	5	5	5	1	2	2	5	2	3	4	3	4	5	2	2	5	1	5	1	5	4	1	5	5	1	5	3	1	5	5	1	1	5	1	5	0	0	0
1596	30	1	2	2	2	2	3	4	2	4	4	3	3	3	4	3	4	3	1	5	3	4	4	5	2	2	4	2	3	1	4	4	2	3	3	2	4	2	2	3	5	2	3	3	2	4	1	1	2
1597	22	1	1	1	2	1	1	5	2	5	5	5	5	5	5	5	5	5	5	5	5	5	5	5	5	5	4	4	4	4	4	4	4	4	4	4	4	4	4	4	4	4	4	4	4	4	1	1	1
1598	28	1	2	3	3	1	1	3	2	3	3	4	4	4	4	2	2	2	1	1	2	2	2	3	2	2	3	2	3	2	3	2	2	2	3	2	3	2	2	3	3	3	3	3	2	3	0	0	1
1599	30	2	1	3	3	1	1	4	2	5	5	4	3	4	4	2	4	3	1	4	2	2	4	3	2	2	3	4	2	1	4	2	2	4	4	2	4	2	2	4	4	2	2	4	3	4	0	0	0
1600	27	1	1	1	1	2	1	4	2	4	4	3	3	3	3	3	4	4	5	5	5	4	3	3	1	2	3	4	3	3	3	3	3	3	2	3	3	2	3	3	3	3	3	3	3	3	2	2	2
1601	34	1	2	2	2	2	4	3	2	4	4	4	4	4	4	4	4	4	4	4	5	5	5	5	4	4	4	4	4	4	4	4	4	4	4	4	4	4	2	4	5	5	4	4	5	5	2	2	2
1602	30	1	2	2	4	2	1	5	2	5	5	5	5	5	1	1	1	2	1	4	2	2	2	5	4	4	5	1	2	2	4	2	2	2	4	2	2	2	2	4	4	2	2	3	2	4	0	0	0
1603	22	1	1	1	2	1	1	5	2	4	4	4	4	3	2	3	3	3	3	3	3	3	3	3	3	3	4	1	1	1	4	1	1	1	4	1	4	1	1	4	4	1	1	4	2	4	1	1	1
1604	30	1	1	1	3	1	1	5	2	5	5	5	4	5	2	2	2	3	1	2	2	2	3	2	2	3	4	2	3	1	4	4	4	2	5	4	3	1	1	5	5	2	2	5	3	4	0	0	0
1605	24	1	1	1	3	2	2	5	2	4	4	4	5	5	4	2	3	2	1	5	4	2	3	3	2	2	2	3	2	3	3	3	3	3	3	1	2	3	3	2	2	3	3	2	3	2	1	1	1
1606	26	1	1	2	3	1	3	3	2	5	5	5	5	5	2	2	2	2	2	4	3	3	3	3	3	3	4	2	2	2	4	4	4	4	2	2	3	2	3	3	3	2	3	2	3	3	1	1	1
1607	33	1	2	2	2	2	3	3	2	5	5	5	5	5	1	3	4	2	1	3	3	3	4	1	2	3	3	2	2	2	3	3	2	2	3	3	3	3	2	3	3	3	1	3	2	5	1	2	1
1608	23	1	1	1	3	1	2	5	2	4	4	4	3	4	3	2	3	2	3	3	3	3	3	2	3	2	4	2	2	2	3	4	2	4	4	2	4	2	2	4	4	3	2	2	3	4	1	1	1
1609	34	1	2	2	4	2	4	2	1	4	4	3	4	4	3	1	2	4	1	3	3	2	5	3	2	2	3	2	2	2	3	3	4	4	4	2	2	2	2	3	4	3	4	4	3	3	1	1	1
1610	19	1	1	1	2	1	1	5	2	4	5	5	5	5	5	5	5	5	5	5	5	5	5	5	5	5	3	2	3	2	4	4	4	4	3	3	3	3	3	3	3	3	3	3	3	3	2	1	1
1611	30	2	1	1	3	1	1	4	2	5	5	5	5	5	2	2	2	2	1	4	2	2	4	3	2	2	4	1	3	1	4	1	2	4	4	2	4	2	2	4	4	1	2	2	2	4	0	0	0
1612	56	1	1	2	1	1	4	2	2	4	4	4	4	4	4	4	4	4	4	4	4	4	4	4	4	4	4	5	4	1	4	1	1	4	4	1	4	1	1	4	4	1	4	4	4	5	0	0	0
1613	29	1	1	2	3	1	1	5	2	5	5	3	5	5	2	5	4	3	2	3	2	4	4	2	3	3	3	3	2	3	2	3	3	3	3	2	4	3	3	3	3	3	3	3	3	2	1	1	1
1614	25	1	2	1	3	2	2	3	2	5	5	5	5	5	2	2	2	2	2	3	3	3	4	5	3	3	4	1	3	1	5	2	3	5	5	2	4	2	1	5	3	2	1	4	1	4	0	1	1
1615	26	2	1	3	3	1	3	5	2	5	5	5	5	5	2	2	2	2	2	5	3	4	4	4	2	4	2	2	2	3	2	4	3	2	2	2	3	2	2	2	2	2	2	2	3	2	2	1	2
1616	28	1	2	1	4	2	2	4	2	5	5	5	5	5	1	1	1	2	1	4	2	1	4	2	4	4	4	1	3	1	5	1	1	1	5	1	3	1	1	4	5	1	1	2	1	3	0	0	0
1617	30	1	2	3	3	1	2	4	2	5	5	5	5	5	5	5	5	5	5	5	5	5	5	5	5	5	4	4	1	2	5	2	3	3	5	1	4	1	2	4	4	3	5	2	5	4	0	0	0
1618	32	1	1	3	3	1	4	5	2	3	4	3	2	3	5	5	5	5	3	5	5	5	2	2	2	2	3	3	3	2	3	3	3	2	4	4	4	2	2	3	3	2	2	4	3	3	1	2	2
1619	33	1	2	2	3	2	4	3	2	3	4	3	4	4	4	3	3	1	4	2	2	2	2	2	4	4	5	2	1	2	4	4	3	1	4	1	1	5	3	3	3	2	4	3	4	4	2	1	1
1620	27	1	1	1	3	1	1	5	2	4	4	4	4	4	4	4	4	2	2	2	2	2	4	4	2	2	4	2	2	2	4	2	2	2	4	2	4	2	2	2	4	2	2	4	2	4	1	1	1
1621	37	2	2	2	3	2	2	2	1	4	4	4	4	5	2	3	2	2	1	3	3	3	3	2	3	3	3	3	2	2	3	4	2	3	3	2	4	4	2	3	3	3	2	2	2	3	1	1	1
1622	26	2	1	3	2	1	3	1	2	5	5	5	5	5	5	2	2	2	2	3	2	2	2	2	2	2	5	1	5	1	4	4	2	4	4	4	4	2	2	4	4	2	2	4	2	3	0	0	0
1623	22	1	1	1	2	1	1	3	2	4	4	4	4	4	4	4	4	4	3	4	5	4	4	3	3	2	3	3	3	3	3	3	3	3	3	3	3	3	3	3	3	3	3	3	3	3	2	2	2
1624	30	1	2	3	3	1	4	5	1	3	4	4	3	3	3	3	3	3	3	4	4	4	4	4	2	2	2	2	2	2	3	3	3	2	2	2	2	3	3	2	3	2	3	2	3	2	1	1	1
1625	37	1	1	2	3	2	1	3	1	4	3	5	5	3	4	3	2	2	1	5	4	3	4	3	3	3	3	3	3	3	3	3	3	3	3	3	3	3	3	3	3	3	3	3	3	3	1	2	2
1626	39	1	2	2	4	2	4	2	1	5	5	5	5	5	2	2	2	2	1	2	3	3	4	4	2	2	4	1	2	3	4	4	4	2	4	1	3	2	2	2	4	4	3	3	3	2	0	1	1
1627	32	1	2	3	4	2	3	2	2	5	5	5	5	5	5	2	2	4	2	5	3	3	4	3	3	3	3	3	3	3	4	3	3	3	3	2	5	2	1	3	3	3	3	3	2	5	1	1	1
1628	32	1	2	2	3	1	4	3	2	5	5	5	5	5	1	1	1	1	1	4	4	4	4	3	2	2	5	2	4	2	4	3	2	3	4	2	4	2	2	4	4	2	3	3	2	4	0	0	0
1629	34	1	2	2	3	1	4	5	2	5	5	5	5	3	2	2	2	4	1	5	3	3	5	4	4	3	4	2	3	2	5	3	3	4	3	2	4	2	3	4	4	2	2	2	2	4	1	1	1
1630	26	1	2	2	2	1	3	5	2	5	5	5	5	5	2	2	2	2	1	4	2	3	3	5	2	2	3	2	2	1	3	1	2	3	4	2	3	2	2	3	3	2	2	2	2	3	1	1	1
1631	30	2	1	3	2	1	1	5	2	4	4	4	4	4	2	2	2	2	1	3	3	3	3	3	2	2	4	2	4	2	4	2	2	2	4	3	2	2	2	2	4	2	2	4	2	2	0	1	1
1632	35	1	2	3	4	1	3	4	2	5	5	5	5	4	4	5	2	4	1	5	5	5	5	4	4	3	4	3	2	3	3	4	2	3	3	2	3	3	3	3	4	3	2	3	2	3	1	1	1
1633	22	1	1	1	2	1	2	4	2	5	5	5	5	5	5	3	3	3	3	3	3	3	3	3	2	4	3	2	3	2	3	2	3	3	4	2	3	2	2	3	3	3	3	2	3	4	1	1	1
1634	24	1	2	1	3	2	2	4	2	3	3	3	3	3	3	3	3	3	3	3	3	3	3	3	3	3	5	5	5	5	5	5	5	5	5	5	5	5	5	5	5	5	5	5	5	5	1	1	1
1635	34	1	2	2	3	2	4	3	2	5	4	5	5	5	2	2	2	2	1	4	3	3	4	2	2	3	4	2	3	2	4	3	2	4	4	2	3	2	2	5	5	2	2	2	3	5	0	1	0
1636	25	1	1	2	2	1	2	5	2	4	4	4	4	4	4	4	4	4	4	4	4	4	4	4	4	4	5	2	2	1	5	5	1	5	5	1	5	5	1	5	5	5	1	1	1	1	1	1	1
1637	33	1	2	2	4	2	4	4	2	5	5	5	5	5	1	1	1	1	1	5	2	2	3	5	5	5	4	1	1	1	4	3	2	1	5	1	4	2	2	4	4	2	3	4	3	4	0	1	0
1638	31	2	2	2	3	1	3	5	2	4	4	4	4	4	4	2	3	3	1	5	3	3	4	2	2	3	4	2	3	1	4	2	3	3	4	4	4	2	2	4	4	2	3	4	4	3	1	1	2
1639	30	1	2	1	4	2	3	2	1	5	5	4	5	3	3	2	2	3	2	2	3	3	3	3	2	2	3	3	2	3	3	3	3	3	2	3	2	4	4	3	4	3	4	2	3	3	1	2	2
1640	32	2	1	3	3	1	1	3	2	4	4	4	4	3	2	2	2	2	2	2	2	2	3	2	2	2	4	2	2	2	3	4	4	2	4	2	4	2	2	4	3	3	3	2	2	2	1	1	1
1641	21	1	1	1	2	1	2	5	2	4	4	4	4	4	2	2	3	2	2	4	3	3	5	4	4	3	3	3	2	2	3	3	4	4	2	2	4	2	2	3	4	4	2	2	4	3	1	0	1
1642	30	2	3	1	4	2	2	5	2	2	3	1	3	5	4	5	3	4	5	5	5	5	5	5	1	2	4	2	2	2	5	3	2	4	4	3	4	3	2	4	4	1	2	2	1	5	1	1	0
1643	19	1	1	1	2	1	1	5	2	4	4	4	4	4	4	4	4	4	4	4	3	3	3	3	2	2	3	3	3	3	3	3	3	3	3	3	3	3	3	3	3	3	3	3	3	3	1	1	1
1644	31	1	1	1	3	1	1	5	2	4	4	4	4	4	2	2	2	3	1	2	2	2	2	3	2	2	3	1	3	1	3	1	1	1	3	1	3	1	1	3	3	1	2	2	3	2	0	0	0
1645	31	2	1	3	2	1	3	5	2	3	4	4	3	4	4	2	4	2	1	3	3	2	2	4	2	2	3	2	3	1	4	4	2	2	3	2	4	4	2	3	4	2	2	4	3	3	0	1	0
1646	36	1	2	2	4	2	4	5	1	4	4	3	4	5	2	2	2	2	1	2	2	3	3	4	3	3	2	3	1	1	4	3	2	2	4	2	4	2	2	4	4	1	3	3	3	2	1	1	1
1647	33	1	2	2	4	2	4	4	1	5	5	5	5	5	1	1	1	2	1	1	3	3	3	2	3	3	4	2	3	1	3	3	2	3	4	3	4	2	3	4	4	2	3	3	3	3	0	1	1
1648	35	1	2	2	3	2	4	4	2	5	5	5	5	5	1	1	1	1	1	5	1	1	5	2	5	5	5	1	5	1	5	1	1	5	5	1	5	1	1	5	5	1	1	5	5	3	0	0	0
1649	38	1	2	2	3	1	4	4	2	5	5	3	4	5	2	2	2	2	1	2	2	3	4	4	3	3	3	2	2	4	3	3	2	2	3	3	4	2	2	3	3	2	3	2	4	4	1	1	1
1650	34	1	2	2	3	2	4	5	2	4	4	4	4	4	2	2	2	2	4	4	4	4	4	4	2	2	2	4	2	4	4	4	3	3	2	1	2	2	2	3	3	2	2	3	3	3	1	2	2
1651	24	2	1	1	2	1	1	5	2	4	4	4	5	4	3	3	4	2	1	4	4	4	5	4	2	2	1	2	1	2	4	4	4	3	3	4	3	4	3	3	3	3	3	3	3	4	0	1	2
1652	31	1	2	2	4	2	3	5	2	3	3	3	3	4	4	4	4	2	2	4	4	2	2	2	3	3	4	4	4	4	4	4	3	4	4	2	2	2	4	4	4	4	4	4	4	4	1	1	1
1653	37	1	2	2	4	2	4	4	2	5	4	4	5	5	2	2	3	2	2	4	4	5	5	3	3	5	3	1	3	1	4	2	1	1	4	1	3	2	2	4	5	2	1	2	2	4	0	0	1
1654	31	2	2	2	2	1	3	4	2	4	5	4	4	3	4	1	3	2	2	4	2	3	4	4	3	3	4	1	2	1	3	2	2	2	4	2	4	1	2	3	3	2	2	3	2	3	0	1	0
1655	29	2	2	2	3	1	3	4	2	5	5	5	5	5	2	1	2	2	2	2	2	2	2	2	2	2	3	2	3	1	3	2	2	3	3	3	3	2	2	3	4	2	2	4	2	4	1	1	1
1656	31	1	1	1	3	1	2	5	2	5	5	5	5	5	2	3	2	5	2	4	4	5	3	5	1	1	4	1	1	1	5	3	4	5	5	1	4	1	1	4	5	2	4	5	5	5	1	1	1
1657	32	1	2	2	3	1	3	5	2	4	4	4	4	3	4	3	3	2	3	4	4	3	5	3	3	3	4	2	2	1	5	3	2	2	3	1	2	2	2	4	4	2	1	5	2	4	0	0	0
1658	35	1	2	2	3	2	4	3	2	4	5	4	4	4	2	2	1	3	3	3	4	5	4	3	2	2	3	2	3	2	4	2	2	4	4	2	4	2	2	4	4	2	2	4	4	4	1	1	1
1659	23	1	1	1	3	1	2	5	2	4	4	3	3	5	2	2	2	3	3	3	2	3	3	3	2	3	3	2	2	1	3	4	3	3	3	1	3	3	2	3	3	2	2	2	3	3	1	1	1
1660	28	1	1	2	3	2	1	4	2	4	4	3	3	4	2	2	3	2	3	3	3	3	3	3	2	2	3	2	2	2	4	3	2	2	3	1	2	2	1	3	4	1	2	3	2	3	1	1	1
1661	20	1	1	1	2	1	1	5	2	3	5	4	3	4	2	2	2	2	2	4	2	2	4	4	3	2	4	3	2	4	4	3	4	4	2	2	4	4	4	4	4	3	3	2	4	4	0	1	2
1662	26	1	1	1	2	1	1	4	1	5	4	4	4	3	3	3	3	3	1	4	2	2	3	3	2	2	3	3	3	3	3	3	3	3	3	3	3	3	3	3	3	3	3	3	3	3	2	2	2
1663	32	1	2	3	3	2	4	5	2	2	3	3	3	3	5	3	5	2	3	5	5	4	5	5	4	3	3	4	1	3	3	4	4	3	4	1	4	3	2	4	4	2	3	2	3	3	1	1	2
1664	30	1	1	1	2	1	1	5	1	3	3	3	3	3	3	2	2	3	2	2	3	3	3	3	2	2	3	3	3	2	3	3	2	3	3	2	3	2	3	3	3	3	3	2	3	3	1	1	1
1665	29	2	2	1	2	1	1	4	2	3	3	3	3	3	3	3	3	3	1	3	2	2	2	2	1	1	5	1	4	2	5	4	2	5	5	1	5	1	1	4	5	1	1	4	1	5	1	0	0
1666	39	1	2	2	2	1	4	3	2	4	4	4	2	4	4	4	4	4	4	4	4	4	4	2	4	4	4	2	4	2	4	5	2	4	2	4	1	2	2	4	4	4	4	4	4	4	1	1	1
1667	30	1	1	3	2	1	3	4	2	3	3	3	3	3	3	3	3	3	2	3	3	3	3	1	2	2	4	2	2	2	4	2	2	2	2	2	3	2	2	3	3	2	3	3	3	3	1	1	1
1668	32	1	2	1	2	1	4	3	2	4	3	3	3	3	2	2	2	3	3	3	3	3	3	3	2	2	3	2	2	3	3	3	3	3	3	2	3	2	2	3	3	2	2	3	3	2	1	1	1
1669	32	1	2	2	3	2	4	3	1	5	4	2	4	3	3	3	5	4	1	3	2	2	3	4	4	4	5	2	3	1	3	5	5	4	2	1	5	4	5	3	1	1	4	4	4	2	3	1	0
1670	22	1	2	1	2	1	1	5	2	5	5	5	5	5	5	5	5	5	5	5	5	5	5	5	4	4	2	2	2	2	2	2	2	2	2	2	2	2	2	2	2	2	2	2	2	2	1	1	1
1671	22	1	1	1	2	1	2	5	2	5	5	2	1	3	4	4	4	3	1	5	5	4	4	4	2	2	4	4	2	2	4	4	4	4	4	4	4	4	2	4	4	4	4	4	2	4	1	1	1
1672	37	1	2	2	3	2	4	4	2	3	3	3	3	3	2	2	2	2	5	4	3	3	3	3	3	3	3	3	3	3	3	3	3	3	2	3	3	2	3	3	3	3	3	3	3	3	1	1	2
1673	32	1	1	2	3	1	4	5	2	3	3	4	4	2	2	2	2	3	4	4	4	3	4	2	1	1	2	1	3	4	4	4	2	4	2	4	2	3	2	4	5	4	3	4	4	3	2	2	0
1674	33	1	2	1	3	2	3	3	2	5	5	5	5	5	5	5	5	5	5	5	5	5	5	5	5	5	5	5	5	5	5	5	5	5	5	5	5	5	5	5	5	5	5	5	5	4	0	0	0
1675	26	1	1	2	2	1	1	5	2	5	5	5	5	5	1	1	3	3	1	3	4	3	4	3	2	2	5	3	3	2	4	3	2	3	3	2	3	2	2	3	4	2	3	2	2	3	1	1	1
1676	25	2	2	2	2	1	2	4	2	4	4	5	4	5	2	2	2	2	2	4	3	2	3	3	3	2	4	2	3	2	5	3	3	2	2	4	4	2	3	2	5	3	3	3	3	3	1	1	1
1677	26	2	1	2	2	1	1	5	2	5	5	3	5	5	2	2	2	5	3	5	3	2	5	3	1	1	3	1	3	1	4	3	3	4	4	4	4	2	4	4	4	2	4	3	2	4	1	1	1
1678	30	1	2	2	3	2	3	3	2	4	4	3	3	4	2	3	2	2	4	4	5	4	4	4	3	3	3	2	3	2	4	3	3	4	4	2	3	4	1	3	4	2	2	3	4	4	1	1	0
1679	33	2	2	2	2	1	4	5	2	4	4	4	3	4	3	3	3	3	3	3	3	3	4	3	3	3	4	2	3	2	4	2	2	4	4	2	3	4	2	3	3	2	2	3	2	2	0	0	0
1680	35	1	2	2	1	2	4	2	2	5	5	5	5	5	5	2	2	2	2	2	2	2	5	2	5	5	4	4	4	4	4	2	2	2	4	2	4	2	2	2	2	2	2	2	2	2	0	0	0
1681	25	1	2	2	2	1	2	4	2	3	4	3	4	4	3	2	2	2	2	3	2	2	3	2	2	3	4	1	4	1	4	2	2	4	4	1	4	1	2	4	4	4	2	4	4	1	0	1	0
1682	25	1	1	1	2	2	2	4	2	4	4	4	4	3	3	3	3	3	3	3	4	3	3	3	3	2	3	2	2	2	3	3	3	2	3	2	3	2	2	3	2	2	2	3	2	3	1	1	1
1683	27	1	1	1	2	1	1	1	2	4	4	4	4	4	2	2	2	2	2	4	2	2	4	2	4	4	4	2	2	2	4	2	4	4	4	4	4	2	2	4	4	2	2	4	2	4	0	0	1
1684	29	1	1	2	3	1	1	5	2	3	3	3	3	3	3	3	3	3	3	4	2	3	3	4	3	3	3	1	3	1	4	1	1	1	1	1	4	1	3	3	4	3	4	3	1	3	0	1	1
1685	33	1	2	1	2	1	4	5	2	1	1	1	1	4	4	3	4	3	3	4	4	4	4	2	2	2	2	3	1	1	3	3	5	2	1	2	2	5	5	1	3	3	5	5	5	3	3	3	1
1686	29	1	3	2	4	2	2	5	1	4	4	3	4	4	3	4	3	2	1	4	4	4	4	4	4	4	2	3	2	2	2	3	3	3	3	2	2	2	3	3	3	3	2	3	3	2	1	1	2
1687	30	1	2	2	2	1	3	5	2	5	5	5	5	5	5	1	2	2	1	3	1	2	5	4	4	3	5	1	2	1	5	2	1	1	5	1	5	1	1	5	4	1	1	1	1	5	0	0	0
1688	25	1	1	1	2	1	1	5	2	3	4	3	3	4	4	2	4	2	2	3	2	4	4	4	2	2	5	2	3	2	3	3	4	2	3	2	4	2	2	3	3	2	2	3	3	4	1	1	1
1689	22	1	2	1	3	1	2	4	2	4	4	4	4	4	1	1	1	4	3	4	2	3	4	4	2	2	3	2	2	2	3	3	2	2	2	2	3	2	3	4	4	3	3	2	2	3	1	1	1
1690	37	1	2	2	4	2	4	3	2	5	5	5	5	5	2	2	2	4	2	1	4	4	4	4	3	3	4	2	4	2	4	2	2	4	4	3	3	2	2	3	3	3	2	3	2	2	1	1	1
1691	25	1	1	1	2	1	1	5	2	4	5	4	4	4	3	3	3	3	3	3	3	3	3	3	3	3	3	3	3	3	3	3	3	3	3	3	3	3	3	3	3	3	3	3	3	3	1	1	1
1692	26	1	2	1	4	2	2	4	2	4	4	4	4	4	2	2	2	2	2	4	2	2	4	4	4	4	4	2	3	2	5	2	2	3	4	2	4	2	3	4	4	2	2	4	4	4	1	1	0
1693	37	1	2	2	4	2	1	3	2	5	5	5	5	4	2	2	2	2	2	2	3	4	4	2	3	3	4	2	2	2	4	2	3	2	4	2	4	2	2	4	2	2	2	2	2	4	0	0	0
1694	33	1	2	3	2	2	4	3	2	5	5	5	5	5	2	2	2	2	2	2	2	2	3	2	3	3	4	2	3	2	3	3	2	3	3	2	3	2	2	2	3	3	2	3	3	3	1	1	2
1695	38	1	2	2	4	2	4	3	1	5	5	5	5	5	2	2	2	2	1	2	2	2	4	4	2	4	4	2	4	1	5	2	1	5	5	1	5	1	1	5	5	1	1	4	2	5	0	1	1
1696	23	2	1	1	2	1	3	5	2	4	5	5	4	5	2	2	2	2	2	2	2	2	2	2	2	2	3	2	2	1	5	2	2	2	4	2	3	1	2	3	4	2	1	2	2	4	0	1	1
1697	40	2	2	2	2	1	3	3	1	4	4	4	4	4	2	3	4	4	2	2	2	3	3	3	2	2	2	3	1	4	2	4	2	4	4	4	4	2	2	2	4	2	4	3	4	4	1	0	0
1698	35	1	2	3	3	2	4	3	2	3	4	3	3	2	2	3	3	3	5	3	4	4	4	3	1	1	2	3	2	3	2	4	3	2	2	2	3	3	3	3	3	3	3	2	3	2	1	2	3
1699	38	1	2	2	4	2	4	3	2	4	4	4	4	4	2	2	2	2	2	2	3	3	4	2	3	3	3	3	1	2	3	3	3	2	4	1	3	2	2	4	3	2	2	3	3	2	1	0	1
1700	27	1	2	2	2	2	2	3	2	4	4	4	1	3	4	4	3	2	2	4	3	3	3	2	2	2	3	2	3	3	3	3	3	2	3	1	1	2	1	4	4	2	2	4	3	5	1	2	0
1701	39	1	1	1	2	1	3	5	2	4	4	4	4	4	2	2	2	2	1	3	2	2	2	4	2	2	4	2	2	2	3	4	2	2	2	2	4	2	2	4	3	2	2	3	2	2	1	1	0
1702	30	1	2	1	2	2	3	3	2	5	5	5	5	5	1	2	1	1	4	2	3	3	4	2	3	3	5	1	4	1	4	1	1	4	4	1	2	2	2	5	5	1	3	4	3	4	0	0	1
1703	29	1	1	3	3	1	2	5	2	3	5	3	3	5	2	2	2	2	2	3	5	3	3	2	2	2	3	1	1	1	3	1	3	1	3	1	1	3	1	3	4	2	1	1	1	3	0	0	1
1704	23	1	1	1	3	1	2	5	2	5	3	4	4	4	3	2	3	4	1	4	3	4	4	5	2	2	3	4	2	2	3	5	5	2	2	2	2	3	3	3	3	3	3	2	5	2	1	1	3
1705	32	1	2	2	3	1	1	5	1	4	4	3	4	4	2	2	3	4	1	3	3	3	3	3	2	2	3	2	2	1	3	2	2	2	3	2	3	2	2	3	3	2	2	3	3	3	1	1	1
1706	34	1	2	3	3	2	3	4	2	3	3	2	3	1	4	3	4	3	1	3	3	3	3	1	1	3	3	2	4	2	3	2	3	3	4	2	4	2	2	4	4	3	3	4	4	4	1	1	2
1707	29	1	1	1	3	1	1	5	2	5	4	4	4	5	1	1	1	2	1	5	5	4	4	4	4	4	4	1	4	2	5	3	2	4	4	2	3	2	2	4	5	2	2	4	3	3	1	1	1
1708	34	2	2	2	2	2	4	1	1	4	4	4	4	3	2	2	2	3	1	4	4	3	4	4	4	4	3	2	1	1	4	4	2	1	3	3	2	1	4	4	4	2	4	2	2	2	1	1	3
1709	33	1	2	2	4	2	4	3	2	5	5	4	5	3	2	2	2	2	4	4	4	4	4	3	4	4	3	3	2	3	3	3	3	3	3	3	3	3	3	3	4	2	2	3	3	3	0	1	2
1710	30	1	2	2	3	2	4	4	2	5	5	5	5	5	2	5	2	2	1	5	5	4	4	3	4	3	3	3	2	2	4	3	2	3	4	2	4	2	2	3	4	2	3	4	2	3	1	1	2
1711	30	2	2	3	2	1	1	5	2	5	5	5	5	5	5	2	2	2	1	2	2	3	4	2	4	3	4	2	1	1	4	3	1	4	4	4	4	1	2	4	4	3	2	2	3	4	1	1	1
1712	29	1	2	2	4	2	3	5	2	5	5	5	5	5	2	2	2	3	3	4	2	2	3	3	2	2	3	2	1	3	4	4	3	1	3	1	2	3	2	3	3	3	3	2	3	3	1	1	3
1713	34	1	2	2	3	2	1	4	2	4	5	4	4	5	2	2	3	2	1	4	3	2	4	2	2	2	3	2	4	1	5	2	2	3	5	1	4	1	3	4	4	1	2	4	2	4	1	1	1
1714	36	1	2	2	3	2	3	5	2	5	5	5	5	4	2	2	2	5	2	3	2	2	4	2	3	4	5	1	3	2	4	2	1	5	5	1	5	1	1	4	4	1	1	4	1	5	1	1	1
1715	31	1	2	3	3	1	1	5	2	4	4	3	4	4	2	2	2	2	1	3	2	2	3	2	3	3	4	2	3	1	5	1	1	1	4	1	2	2	2	4	4	2	2	4	2	3	0	0	0
1716	28	1	1	1	3	2	1	5	2	4	4	4	4	4	2	2	2	2	2	3	3	3	3	3	3	3	3	2	1	1	3	2	4	2	3	2	2	2	2	3	4	2	4	1	3	4	0	1	1
1717	28	2	2	2	3	2	3	5	2	4	4	4	4	4	2	2	2	2	1	4	3	3	4	3	3	3	3	3	2	2	3	2	2	4	2	4	4	2	3	2	4	2	3	4	2	3	1	1	1
1718	24	1	1	1	1	1	2	5	2	2	4	1	2	4	4	2	5	4	4	4	2	2	5	4	2	2	4	4	2	3	3	4	4	3	3	1	5	4	2	5	4	3	1	5	5	3	1	1	2
1719	28	2	1	2	3	2	1	5	2	4	4	4	4	4	2	2	2	2	1	3	2	3	3	3	2	2	3	2	2	2	3	2	2	3	4	4	4	2	2	3	3	2	2	3	2	3	1	1	1
1720	29	2	1	2	2	1	2	5	2	5	5	5	5	5	1	1	1	1	5	5	5	1	1	5	5	5	5	1	5	1	5	1	2	2	1	1	5	1	1	5	5	1	1	5	2	1	0	0	0
1721	28	1	1	1	2	1	1	5	2	5	4	4	5	4	1	4	4	2	1	4	4	4	4	2	2	2	2	1	2	1	4	2	4	4	1	1	4	1	2	4	4	2	2	3	2	3	1	1	1
1722	29	1	1	3	2	1	2	5	2	3	3	3	3	3	4	2	5	3	3	4	5	5	5	5	1	1	2	3	2	3	3	3	4	2	2	1	2	3	2	3	3	3	3	2	3	2	1	1	1
1723	23	1	1	1	3	1	3	5	2	5	5	5	5	5	5	5	5	5	5	5	5	5	5	5	5	5	3	3	3	3	5	1	3	3	3	3	3	3	3	3	3	3	3	3	3	3	0	0	0
1724	24	1	1	1	2	1	2	5	2	3	3	3	3	3	1	3	1	3	1	3	3	3	3	3	3	3	1	1	1	2	1	1	1	1	1	1	1	1	5	5	5	5	5	5	5	5	3	3	3
1725	36	1	1	3	2	1	4	1	2	4	4	4	4	4	2	2	2	4	1	4	3	2	4	4	3	3	4	1	4	1	4	4	1	1	1	1	1	1	1	4	4	2	4	4	3	4	0	0	0
1726	27	2	2	2	2	2	3	5	2	5	5	5	5	5	2	1	3	2	4	3	5	5	5	3	1	1	2	4	1	2	3	3	3	3	3	5	5	2	3	3	3	2	3	3	3	4	3	3	3
1727	23	1	1	1	3	1	3	5	2	5	5	5	5	5	1	1	1	2	1	1	3	2	4	4	2	2	4	4	4	1	4	1	2	2	3	1	4	3	3	4	3	1	1	2	3	3	0	0	0
1728	23	1	1	1	2	1	3	5	2	4	5	4	4	4	4	4	4	4	4	4	4	4	4	4	4	4	4	4	4	4	4	4	4	4	4	4	4	4	4	4	4	4	4	4	4	4	2	2	2
1729	26	1	2	2	4	1	1	5	2	5	5	5	5	5	2	1	1	2	1	3	4	3	4	4	2	2	4	3	2	3	4	4	2	2	5	2	4	1	2	4	4	2	2	4	2	4	0	1	1
1730	34	2	1	2	2	1	3	5	2	4	4	4	3	3	3	2	2	3	2	4	3	2	2	2	3	2	3	1	2	2	4	4	3	2	4	2	4	2	2	3	4	2	2	2	2	3	1	1	1
1731	30	1	1	1	3	1	3	4	2	5	5	5	5	5	2	1	1	1	1	5	2	3	5	2	4	4	4	1	3	2	4	4	4	4	2	2	4	3	2	4	4	4	2	4	3	3	0	0	1
1732	36	2	2	2	2	1	4	5	2	3	4	3	4	5	3	3	3	4	1	5	5	5	3	4	4	4	5	4	4	3	5	4	4	3	3	4	4	5	4	3	4	2	5	4	3	1	2	1	2
1733	33	1	2	2	3	2	3	5	2	5	5	5	5	5	4	4	3	5	1	5	5	4	5	4	3	3	1	1	2	1	2	3	5	4	4	5	3	2	5	2	2	5	5	1	5	2	1	1	1
1734	26	1	1	2	2	1	1	5	2	5	4	3	4	3	3	3	3	3	4	2	3	2	3	5	4	2	3	3	2	2	4	4	3	2	2	2	3	2	3	2	2	4	3	2	2	2	2	1	2
1735	28	1	1	1	2	1	3	5	2	5	5	5	5	5	5	5	5	5	1	5	5	5	5	5	5	5	1	1	1	1	1	1	1	1	1	1	1	1	1	1	1	1	1	1	1	1	0	0	0
1736	28	1	1	1	2	1	2	5	2	4	4	4	4	3	3	3	3	3	3	3	3	3	3	3	3	3	2	2	2	2	2	2	2	2	2	2	2	2	2	2	2	2	2	2	2	2	0	0	0
1737	19	1	1	1	2	1	1	5	2	5	5	4	4	4	2	2	2	2	2	3	2	2	3	4	1	1	3	2	3	1	4	2	2	3	3	1	2	1	2	2	4	2	2	2	2	2	1	1	1
1738	26	1	2	1	2	2	2	3	2	3	4	3	4	4	4	3	4	4	3	4	4	2	4	5	1	1	3	3	1	3	3	4	4	4	2	1	4	4	2	4	4	2	2	3	4	2	1	1	2
1739	25	1	2	1	3	1	2	5	2	4	4	3	4	5	2	2	3	2	1	4	4	4	4	4	4	4	4	2	3	2	4	3	2	4	2	3	2	1	2	3	3	3	2	2	2	5	1	1	2
1740	30	1	2	1	3	1	2	5	2	4	4	4	4	4	2	1	2	2	2	3	2	2	3	2	3	3	4	2	3	2	4	2	2	2	4	2	3	2	2	4	4	2	2	3	2	4	1	0	0
1741	24	1	2	1	3	2	2	4	2	4	4	4	4	4	2	2	2	2	1	3	2	3	4	3	3	3	3	1	1	1	4	5	3	3	4	2	3	1	1	3	5	2	2	1	3	3	1	1	1
1742	37	1	2	2	4	2	4	5	2	5	4	4	5	5	5	5	5	5	1	4	3	3	4	2	2	2	4	4	4	2	3	3	3	3	3	3	3	3	3	3	3	3	3	3	3	3	0	1	1
1743	32	1	1	2	2	1	3	5	2	3	3	3	3	3	3	3	3	3	3	3	3	3	3	3	3	3	3	3	3	3	3	3	3	3	3	3	3	3	3	3	3	3	3	3	3	3	0	0	0
1744	27	1	2	1	3	2	2	4	2	5	5	5	5	3	2	2	2	2	2	3	2	3	3	2	4	3	2	4	1	1	3	3	3	3	3	3	2	2	2	3	4	2	2	2	2	3	1	1	1
1745	22	1	2	1	2	2	1	2	2	5	5	5	5	5	1	2	2	2	1	2	1	1	1	5	3	3	4	2	3	2	5	2	3	3	3	3	4	1	2	3	4	2	2	1	3	1	1	1	0
1746	22	1	2	1	2	1	1	4	2	5	5	5	5	4	4	4	1	4	3	4	4	4	4	3	3	3	3	3	3	3	3	3	3	3	3	3	3	3	3	3	3	3	3	3	3	3	2	2	2
1747	33	1	2	2	3	2	4	4	2	4	4	4	4	4	3	3	3	3	2	4	2	2	3	4	3	3	5	5	3	3	5	5	5	5	5	3	4	4	3	4	4	4	4	4	4	3	1	1	1
1748	33	1	2	2	2	2	3	1	2	5	5	5	5	5	5	1	1	1	1	5	1	1	3	3	4	3	5	1	1	1	5	1	1	5	5	1	5	1	1	5	5	1	1	1	1	5	0	0	0
1749	27	1	2	1	3	2	2	4	2	3	3	3	3	3	3	3	3	4	3	3	2	2	1	2	2	2	4	4	4	3	4	4	4	3	4	4	3	3	3	4	4	4	3	4	4	3	0	1	1
1750	29	1	2	3	4	2	2	3	2	4	4	3	4	4	2	2	2	2	2	2	2	2	3	2	2	3	5	1	5	1	5	1	5	2	4	2	4	2	2	4	3	2	2	4	2	4	1	1	1
1751	28	1	2	2	3	2	2	3	1	5	4	4	5	5	2	2	2	2	1	3	4	3	3	3	4	3	3	4	2	3	4	4	4	3	4	2	3	2	2	4	3	2	4	4	2	4	1	1	1
1752	33	1	2	2	2	2	4	5	2	5	5	5	5	5	1	1	1	1	1	1	1	2	3	3	3	4	5	2	4	2	5	2	2	2	4	1	5	1	1	5	5	1	2	5	4	3	0	1	0
1753	37	1	2	2	4	2	2	5	2	4	4	3	3	3	4	2	3	4	2	3	4	4	3	4	4	4	4	3	3	4	4	4	4	4	4	2	4	4	3	4	4	4	4	5	5	4	1	1	2
1754	28	1	2	1	2	2	3	3	2	4	4	4	4	4	2	2	2	5	4	3	2	1	3	2	3	3	3	3	2	2	3	3	3	4	4	5	4	5	2	4	4	4	4	5	5	4	1	1	1
1755	57	1	2	2	3	1	4	2	2	4	5	4	4	5	4	3	3	3	3	3	3	3	3	2	2	3	3	2	2	2	4	4	3	3	4	2	3	2	2	3	4	3	2	4	2	4	1	1	1
1756	33	1	2	3	3	2	1	5	2	3	4	3	3	4	4	4	3	4	1	4	4	4	4	4	3	3	3	2	2	2	3	4	4	3	3	2	3	2	2	3	3	3	2	3	2	3	0	1	1
1757	32	1	2	3	3	2	1	4	2	5	5	5	5	5	1	5	3	5	1	5	5	5	5	5	3	2	5	1	3	2	5	5	3	3	5	1	5	2	1	1	1	1	1	5	5	5	1	0	0
1758	33	1	2	2	3	2	2	4	2	5	5	5	5	5	5	5	5	5	5	5	5	5	5	5	5	5	4	4	3	5	3	5	3	3	3	2	5	2	3	3	2	3	2	5	3	5	3	3	3
1759	36	1	2	2	4	2	4	5	2	4	4	4	4	5	3	3	4	3	3	3	3	4	4	3	1	1	3	3	2	1	4	4	3	3	3	3	3	3	2	4	4	2	2	3	2	4	1	1	1
1760	28	2	3	2	4	2	2	2	1	5	5	5	5	5	1	1	1	1	1	1	4	4	4	3	3	3	3	4	2	3	3	3	4	4	4	4	4	3	3	3	3	3	3	3	3	2	1	1	1
1761	26	1	2	2	3	2	1	5	2	3	3	3	3	3	3	3	3	3	3	3	3	3	3	3	3	3	3	3	3	3	3	3	3	3	3	3	3	3	3	3	3	3	3	3	3	3	1	1	1
1762	29	1	2	3	4	2	2	4	2	4	4	4	4	3	2	2	2	3	5	3	3	3	4	3	2	3	2	2	2	2	3	3	2	2	2	2	2	3	2	3	2	3	2	3	2	2	1	1	3
1763	28	1	2	3	4	2	2	5	2	4	4	4	3	5	3	2	2	3	2	4	2	2	3	2	2	3	3	4	1	2	5	3	3	2	2	2	2	4	2	2	3	3	2	2	3	3	0	0	1
1764	32	1	2	1	4	1	1	5	2	4	5	4	4	5	2	2	2	2	2	3	4	3	4	4	2	4	2	3	2	2	3	3	3	2	2	3	3	2	2	3	2	3	2	2	3	3	1	1	2
1765	38	1	2	2	4	2	3	2	1	1	1	1	1	5	5	5	5	1	1	1	1	5	5	3	3	3	3	3	3	3	3	3	3	3	3	3	3	3	3	3	3	3	3	3	3	3	0	1	0
1766	34	1	2	2	4	2	4	2	1	5	5	4	4	5	1	4	2	2	5	2	2	2	4	3	3	3	3	3	2	2	4	3	3	4	4	2	4	2	2	4	4	2	3	4	3	4	1	1	1
1767	37	1	2	2	4	2	4	2	2	4	4	4	4	4	2	2	2	3	2	2	2	2	3	2	3	2	4	2	3	2	4	3	2	4	4	2	4	2	2	3	4	2	2	2	2	3	0	1	1
1768	28	2	2	2	2	1	2	3	1	5	5	5	5	5	1	1	1	1	1	2	3	2	3	2	3	3	3	3	2	2	4	3	2	4	4	2	4	2	2	4	4	4	3	4	3	4	0	0	0
1769	27	1	2	3	3	2	3	4	2	4	4	3	3	2	3	2	2	2	3	4	3	3	5	3	3	3	2	3	1	2	3	3	3	3	4	2	4	3	2	4	4	3	2	4	4	4	1	0	2
1770	30	1	2	2	4	2	3	2	1	5	5	5	5	5	1	2	2	2	1	2	2	2	2	2	3	3	4	2	3	2	4	2	2	1	4	2	2	2	2	2	4	2	2	5	5	4	0	0	0
1771	27	1	2	1	4	2	2	4	2	3	4	3	3	3	3	2	3	3	1	2	2	2	3	2	3	3	4	2	2	2	4	4	2	2	4	3	4	4	4	4	4	2	3	2	3	3	2	1	2
1772	24	2	2	1	2	1	2	5	2	4	4	4	4	4	4	4	4	4	4	4	4	3	3	1	1	1	4	2	2	2	4	4	2	2	4	2	2	3	2	4	4	2	2	3	2	4	1	1	1
1773	30	1	2	3	2	2	2	5	2	2	4	1	1	3	5	3	5	5	4	3	4	3	5	4	3	4	1	1	1	1	3	1	1	1	4	1	4	5	1	4	4	1	1	4	4	4	1	0	0
1774	30	1	2	1	4	2	3	2	2	5	5	4	4	5	2	2	2	2	2	2	2	2	3	2	3	3	2	2	2	1	4	3	4	2	2	2	2	2	2	4	4	2	2	2	4	2	1	1	0
1775	25	2	1	1	2	1	3	5	2	4	4	3	3	3	3	3	3	4	1	4	3	3	3	1	3	2	4	3	1	3	4	4	2	5	3	2	5	1	2	4	3	1	4	4	4	3	2	2	2
1776	27	2	2	1	2	1	2	4	2	5	5	5	5	5	1	3	2	1	1	2	3	1	3	2	3	3	2	4	2	1	4	2	2	2	4	4	4	1	2	3	5	3	3	4	3	5	0	1	1
1777	32	1	2	1	2	2	2	5	2	3	4	3	3	4	3	3	3	2	2	3	2	2	3	3	3	3	1	1	1	3	4	3	1	1	3	1	3	1	2	3	2	1	3	2	3	3	1	2	1
1778	56	1	1	2	4	2	3	2	1	4	5	4	4	5	4	4	4	4	1	2	5	4	4	4	4	4	5	1	5	1	5	1	1	4	5	1	5	1	1	5	5	1	1	5	5	5	0	0	0
1779	31	1	1	2	3	2	3	5	2	4	4	4	4	4	3	2	2	2	2	2	2	2	2	2	3	3	2	2	2	2	4	4	3	4	3	2	3	3	3	3	2	2	2	2	3	3	1	1	1
1780	31	1	2	1	2	1	4	5	2	4	4	4	4	4	3	3	3	3	3	4	3	2	2	3	2	3	2	3	3	3	3	4	4	3	3	2	3	2	2	3	3	3	3	3	4	3	2	1	1
1781	33	1	2	2	4	2	4	4	2	3	3	3	3	3	3	5	5	3	3	3	3	3	3	3	3	3	4	2	3	2	3	2	2	3	3	2	3	2	3	3	3	2	3	3	3	2	1	1	2
1782	43	1	2	2	4	2	4	2	1	5	5	5	5	5	5	5	4	4	1	1	2	2	4	3	3	3	4	1	4	1	4	2	2	2	4	2	2	2	2	2	4	4	2	4	2	3	0	0	1
1783	36	1	2	2	4	2	3	2	1	5	5	5	5	4	1	1	1	1	1	1	2	2	4	4	2	3	2	2	1	1	3	2	2	2	4	2	2	2	2	3	3	2	3	2	2	4	1	1	1
1784	30	1	1	1	2	1	1	3	1	3	4	4	3	5	3	2	3	2	5	3	3	3	3	3	3	3	2	4	2	4	4	4	4	4	3	4	4	4	5	4	3	3	3	3	5	3	1	2	3
1785	31	1	2	1	3	2	1	3	1	5	5	5	5	5	5	1	1	1	1	3	4	4	4	4	4	4	5	1	2	1	4	2	3	3	2	2	2	2	2	4	4	2	2	2	4	3	0	1	1
1786	36	1	2	2	4	2	1	3	1	4	4	4	4	4	2	2	2	2	1	3	3	3	4	3	2	3	3	4	2	2	3	4	4	2	3	2	3	2	3	3	3	3	4	2	3	3	1	1	1
1787	38	2	2	2	3	2	2	2	1	5	5	5	5	5	4	2	2	1	1	3	2	2	3	2	3	2	3	3	1	3	3	3	2	2	2	3	3	3	3	3	3	3	2	2	3	2	1	0	1
1788	36	2	2	2	2	2	2	2	2	4	4	4	3	4	3	3	3	3	1	4	3	3	3	3	2	3	3	3	3	3	3	3	3	2	4	3	4	3	3	2	2	3	4	2	3	2	1	1	1
1789	28	1	2	1	4	2	3	3	2	4	4	4	4	4	4	4	4	4	4	4	4	4	4	4	4	4	3	4	3	4	3	4	3	4	3	4	3	4	4	4	3	4	3	3	3	4	2	1	2
1790	32	1	2	2	4	2	4	3	1	5	5	3	4	4	2	2	2	2	1	3	3	4	5	4	3	3	3	2	3	2	4	3	2	3	2	3	2	4	2	3	3	2	3	4	4	3	2	2	1
1791	34	1	3	2	4	2	4	4	1	5	3	3	4	5	3	3	3	3	1	2	4	5	5	2	2	2	4	2	2	3	4	2	3	2	3	2	2	2	2	3	3	2	2	4	2	3	1	1	1
1792	22	1	2	1	2	1	1	3	1	4	4	4	4	4	2	3	2	3	2	3	3	2	3	4	2	4	3	2	2	2	4	3	3	4	3	5	3	2	3	4	4	4	4	3	3	2	1	1	1
1793	29	1	2	1	2	1	1	4	1	3	3	3	3	3	3	3	3	4	1	4	4	4	4	4	2	2	3	4	3	1	3	3	4	4	2	2	2	4	4	4	3	4	4	4	4	2	1	1	2
1794	41	1	2	2	4	2	4	2	1	5	5	5	5	5	2	2	2	4	1	2	4	4	4	3	2	2	3	4	2	2	3	3	4	3	3	2	3	1	3	4	3	3	2	4	2	3	0	0	1
1795	21	1	1	1	2	2	2	4	2	4	4	3	4	4	4	3	4	3	1	4	4	4	5	3	3	4	3	4	2	2	3	3	4	4	2	2	2	2	4	4	5	4	4	4	4	3	1	2	1
1796	21	1	2	1	2	1	1	3	1	5	5	3	5	4	2	2	3	4	1	4	5	3	3	3	3	3	4	4	4	2	4	2	2	2	4	2	4	4	3	4	4	4	4	4	4	4	2	2	2
1797	24	1	2	1	3	2	1	3	2	3	5	4	4	4	3	1	5	3	1	1	3	1	4	1	1	3	2	5	2	1	3	5	5	3	2	5	5	2	3	5	5	2	1	4	5	5	3	1	0
1798	33	2	2	1	4	1	2	4	2	5	5	5	5	5	1	2	2	2	1	2	3	2	4	2	3	4	2	2	2	2	3	4	2	2	3	3	3	2	3	3	3	3	3	2	3	3	1	1	0
1799	27	2	2	1	3	1	2	4	2	4	4	4	4	4	2	1	2	1	2	4	3	3	5	3	3	3	3	2	2	1	5	3	1	4	5	1	5	1	1	5	5	1	2	5	2	5	0	0	0
1800	30	1	1	1	2	2	3	4	2	5	5	5	5	5	1	1	2	2	3	4	3	3	4	3	2	2	5	2	5	2	5	5	2	2	4	2	2	2	3	2	3	2	3	3	3	2	1	1	1
1801	32	1	2	1	3	2	3	5	2	5	5	5	5	5	2	3	3	1	3	1	2	2	3	2	5	5	4	2	2	2	4	3	2	3	3	1	4	2	1	3	3	2	2	2	1	4	1	1	1
1802	29	1	1	1	3	1	3	3	1	5	4	4	5	5	2	1	2	2	1	2	3	3	4	4	2	2	4	3	2	1	4	3	5	4	3	1	4	4	4	4	5	2	3	2	4	2	0	1	1
1803	37	1	2	2	4	2	4	4	2	4	4	4	4	4	3	3	3	3	3	3	3	3	3	3	3	3	5	4	2	2	4	4	4	4	4	4	4	4	3	4	4	4	4	4	4	3	0	1	2
1804	29	2	2	1	2	1	3	4	2	5	5	5	5	5	1	1	2	2	1	5	1	2	4	2	5	5	1	4	1	2	2	3	5	1	2	2	4	1	3	3	3	2	5	2	2	3	0	1	1
1805	30	1	2	1	4	2	2	3	2	5	5	5	5	5	5	2	2	2	2	2	2	2	3	3	3	3	4	2	3	1	3	3	2	3	3	2	2	3	2	3	5	2	3	3	3	4	1	1	1
1806	37	1	2	2	4	2	4	3	1	4	5	4	3	4	2	2	2	2	1	3	4	5	4	4	3	4	4	3	2	2	4	3	4	2	4	1	2	1	2	3	4	3	2	4	2	3	1	1	1
1807	30	1	3	2	4	2	2	3	1	4	4	3	3	4	3	3	3	3	1	4	4	3	3	3	3	3	3	3	3	3	3	2	4	3	3	3	3	3	3	3	3	3	3	3	3	3	1	1	1
1808	28	1	2	1	4	2	1	3	2	5	5	5	5	5	5	2	2	2	2	2	2	2	2	2	4	4	4	4	4	2	4	4	4	4	4	4	4	4	2	4	4	4	4	4	4	4	1	1	1
1809	38	1	2	2	4	2	1	2	1	5	5	5	5	5	2	2	2	3	1	2	5	5	5	5	3	2	5	1	2	2	5	2	2	2	5	1	3	1	2	4	5	2	1	3	2	5	0	1	1
1810	38	1	2	2	2	2	2	4	1	3	3	3	3	4	3	3	4	4	1	3	4	4	4	4	3	2	3	4	2	3	3	3	4	3	2	1	2	2	3	2	3	2	2	3	4	3	1	2	1
1811	28	2	3	1	4	2	1	3	1	3	3	3	3	3	3	3	3	3	3	3	3	3	3	3	2	2	3	3	3	2	3	2	2	2	2	2	2	2	2	2	2	2	2	2	2	2	2	2	1
1812	25	2	1	1	1	2	2	2	1	5	5	5	5	5	5	5	5	5	1	5	5	5	5	5	5	5	1	5	1	5	1	5	5	5	1	5	5	5	5	5	5	5	5	5	5	5	3	3	3
1813	30	1	2	2	3	2	1	4	2	3	3	3	4	5	3	3	3	3	1	3	3	3	3	3	3	3	3	3	3	3	3	3	3	3	3	3	3	3	3	3	3	3	3	3	3	3	0	0	0
1814	34	1	2	2	4	2	1	4	2	4	4	4	4	4	4	3	3	2	1	5	3	4	4	3	2	3	3	3	2	2	3	3	3	3	3	3	3	2	3	3	3	3	3	3	3	3	1	1	1
1815	35	1	2	3	3	2	4	4	2	3	4	3	3	4	3	3	3	3	1	3	4	4	4	5	2	3	3	2	2	2	3	4	3	3	3	2	3	2	2	3	4	2	2	3	2	3	1	2	2
1816	31	1	2	1	2	2	3	5	2	1	1	3	2	3	4	3	4	4	2	3	2	3	4	3	2	2	2	4	2	2	2	4	3	3	3	3	3	3	3	2	2	4	3	2	3	3	2	2	2
1817	34	1	2	3	4	2	3	4	2	5	5	4	4	4	4	2	3	4	1	4	3	3	4	3	3	4	2	3	2	1	3	3	4	4	3	2	4	3	4	3	4	2	2	3	3	2	0	1	1
1818	34	1	2	3	4	2	4	4	2	5	5	5	5	4	1	1	1	2	3	4	3	4	4	4	3	3	3	2	3	2	4	2	2	3	4	2	3	2	2	3	3	2	2	3	3	5	1	1	2
1819	26	1	2	1	2	2	2	2	2	3	4	3	3	2	2	4	3	4	2	2	4	3	4	4	2	2	3	2	2	1	3	4	4	4	2	4	2	1	2	5	3	2	2	4	4	3	2	3	3
1820	25	2	2	1	1	2	1	5	2	4	4	4	4	4	3	3	3	3	3	3	3	2	3	2	3	3	3	3	3	3	3	3	3	3	3	3	3	3	3	3	3	3	3	3	3	3	1	1	1
1821	31	1	2	3	3	2	3	4	2	4	4	3	3	4	2	4	3	2	1	4	3	3	3	4	3	3	2	2	1	2	4	4	4	4	4	1	1	3	4	4	4	4	1	4	4	4	1	1	1
1822	22	1	2	1	2	2	1	4	2	5	5	5	5	5	2	2	2	1	1	3	2	2	2	2	2	2	4	3	2	2	3	2	2	3	3	1	4	2	2	3	3	3	2	2	2	3	1	1	1
1823	25	1	2	1	2	2	1	3	2	5	5	4	4	4	4	4	4	4	1	4	4	2	3	5	2	2	2	2	2	1	4	2	3	2	2	2	2	2	4	2	4	1	2	2	4	3	0	0	0
1824	26	2	1	1	2	1	3	5	2	3	3	3	3	4	2	1	3	3	3	3	3	3	3	2	1	1	2	5	1	2	2	3	2	2	2	2	2	2	4	5	5	2	4	2	4	2	1	1	3
1825	28	1	2	1	4	2	1	2	1	5	5	5	5	5	1	2	2	2	1	1	2	2	3	3	2	3	3	2	2	2	4	2	3	2	2	2	2	2	1	3	3	2	2	3	3	2	1	1	0
1826	34	1	1	2	3	2	3	3	2	4	4	4	4	4	4	4	4	4	4	3	3	3	4	4	2	2	3	3	3	3	4	2	1	4	5	2	2	1	1	5	4	4	3	4	3	3	0	1	3
1827	23	1	2	1	2	1	2	5	2	4	4	4	4	4	2	2	2	3	3	4	3	3	4	4	3	3	4	2	2	2	4	3	4	2	3	2	2	3	3	4	4	4	2	4	4	4	1	1	2
1828	26	1	2	1	2	2	2	3	1	4	5	5	3	4	4	4	3	2	1	2	4	3	4	4	1	2	3	4	2	3	3	3	4	2	3	4	4	2	2	3	3	4	3	3	2	3	1	1	1
1829	29	2	3	1	3	2	2	5	1	5	5	5	5	5	4	4	4	4	1	5	4	3	3	4	4	4	3	1	3	2	5	2	1	3	5	4	3	2	2	4	4	1	1	4	1	3	1	1	0
1830	25	1	2	1	3	2	2	3	1	4	4	5	4	3	2	2	2	2	1	2	2	1	2	2	3	5	4	2	4	1	5	1	1	4	4	1	4	3	4	4	4	1	2	4	4	4	1	0	0
1831	31	1	2	3	4	2	3	4	1	4	4	5	4	3	2	2	2	3	1	2	2	2	4	3	2	2	3	2	2	2	4	4	3	3	3	2	3	2	3	3	3	3	3	3	2	3	1	1	1
1832	30	2	2	2	4	2	3	2	1	5	5	5	4	5	2	2	2	2	1	5	3	2	4	1	3	3	3	2	3	3	4	3	3	3	4	2	4	4	2	3	3	2	2	4	3	3	0	1	2
1833	27	1	3	2	4	2	2	3	1	5	5	5	5	5	1	1	1	1	1	2	2	2	3	3	4	5	3	2	2	3	5	3	2	4	4	2	4	2	1	4	5	2	1	4	2	4	0	0	0
1834	28	1	2	1	2	2	3	5	2	5	5	5	5	5	2	5	5	2	2	4	2	3	3	2	4	4	2	3	2	4	4	4	4	4	4	4	4	2	2	3	2	4	4	4	4	4	1	1	1
1835	25	1	2	1	3	2	2	3	1	4	4	5	4	4	2	2	2	2	1	4	2	2	4	3	4	4	4	2	2	2	4	4	4	3	4	2	3	2	2	4	4	3	2	4	4	3	1	1	0
1836	33	1	2	2	4	2	4	4	2	5	5	5	5	5	1	1	1	1	1	2	2	3	3	3	2	2	3	2	2	2	3	3	3	2	3	3	2	3	3	2	2	2	3	2	3	2	1	1	1
1837	36	2	2	2	3	2	2	3	1	3	3	3	3	4	4	4	2	2	1	5	4	4	4	4	4	4	2	5	1	5	2	5	1	3	2	5	3	5	5	4	3	5	4	2	5	2	2	2	2
1838	33	1	2	2	4	2	4	4	2	4	4	3	4	3	3	2	3	2	3	2	3	3	3	2	3	3	2	3	1	2	2	3	2	2	2	2	3	2	3	2	2	2	3	2	2	4	1	1	1
1839	28	1	2	2	4	2	3	4	2	5	5	5	5	5	1	2	1	2	1	4	4	3	4	3	2	4	2	3	2	2	3	4	4	2	2	3	3	2	4	4	4	4	4	2	4	4	1	1	1
1840	24	1	2	1	4	2	2	4	2	3	4	3	3	3	3	3	2	2	4	2	5	3	4	3	2	2	3	2	2	3	3	3	2	2	3	1	4	3	3	3	3	2	3	2	2	3	1	2	1
1841	20	1	2	1	2	2	1	4	2	4	5	3	4	5	3	3	3	1	3	2	2	3	3	3	2	1	3	2	3	2	3	3	3	3	3	1	4	2	2	3	4	2	2	4	2	4	1	1	1
1842	39	1	2	3	4	2	4	3	2	5	5	4	5	4	2	2	2	2	2	1	4	4	3	5	1	4	5	1	4	2	3	5	4	4	2	2	4	3	3	2	2	2	3	4	4	4	2	1	0
1843	30	1	2	1	4	2	3	5	2	4	4	4	4	5	1	2	1	1	1	4	5	2	4	4	3	4	3	4	2	2	5	4	2	4	4	1	2	4	3	2	5	4	4	5	3	2	1	1	3
1844	33	1	1	3	2	2	1	3	2	5	5	5	5	5	2	2	2	2	2	5	2	3	4	4	2	3	3	3	3	2	4	2	2	2	3	2	4	2	3	2	3	2	3	3	3	3	0	0	0
1845	30	1	2	1	2	2	2	1	2	4	4	4	4	5	2	2	2	2	2	2	2	4	4	3	2	2	4	1	1	1	5	1	1	4	5	1	1	1	1	4	5	1	1	1	1	4	0	0	0
1846	28	1	2	2	3	1	2	5	2	5	5	5	5	5	2	2	2	2	1	2	3	3	3	3	1	1	3	3	2	1	4	3	2	2	3	1	3	1	2	3	3	2	2	3	4	2	1	1	2
1847	26	1	3	1	4	2	1	2	1	4	4	4	3	4	2	3	2	2	1	2	2	2	3	3	3	3	2	2	2	1	3	2	3	3	2	2	3	3	2	3	3	3	2	3	2	3	1	1	1
1848	27	1	3	1	4	2	1	3	1	4	4	4	4	3	3	2	2	2	1	4	2	2	4	2	3	3	4	2	2	2	5	2	2	2	5	2	2	1	1	5	5	2	2	4	2	4	1	1	1
1849	30	2	3	2	4	2	1	3	1	4	4	4	4	4	2	2	2	3	1	2	3	3	3	3	3	3	3	3	3	3	3	3	3	3	3	3	2	2	2	2	2	2	3	2	2	1	1	1	1
1850	29	1	2	1	4	2	1	2	1	5	5	5	5	5	2	2	2	1	1	2	4	4	3	4	3	4	5	1	2	1	5	2	1	1	5	1	5	1	1	4	4	1	2	4	2	5	1	1	0
1851	29	1	3	2	4	2	1	5	1	5	5	5	5	5	5	5	5	5	5	5	5	5	5	5	5	5	1	1	1	1	1	1	1	5	5	1	1	5	1	5	5	1	1	5	1	5	0	0	0
1852	27	1	3	2	4	2	2	3	1	5	5	5	5	4	2	2	2	4	1	2	2	2	4	4	4	4	4	2	2	2	4	1	1	4	4	1	3	1	1	3	4	1	1	1	1	4	0	0	0
1853	26	1	3	1	4	2	2	2	1	1	2	1	1	2	5	5	5	5	1	5	1	5	1	3	1	1	1	4	1	2	2	5	5	2	1	5	1	3	5	1	1	5	5	2	5	1	3	3	3
1854	26	1	3	1	4	2	1	4	1	5	5	5	5	5	5	2	2	2	2	4	4	3	4	5	3	3	5	1	5	1	5	1	1	5	5	1	5	1	1	5	5	1	1	5	1	5	0	1	0
1855	27	1	3	1	4	2	1	2	1	3	5	3	3	4	2	3	3	2	1	3	3	3	3	5	2	2	3	3	2	2	4	2	3	3	2	2	3	2	3	3	3	3	1	2	2	5	1	2	3
1856	29	2	3	2	4	2	2	2	1	5	5	5	5	5	1	2	2	2	1	3	2	2	3	2	3	3	3	2	3	2	3	3	2	3	3	2	2	2	4	2	3	2	4	2	4	2	1	1	2
1857	27	2	2	2	2	1	2	5	2	4	4	4	4	5	2	4	2	2	4	4	4	4	4	5	4	2	4	1	3	1	4	2	2	4	4	2	4	2	2	3	4	2	2	4	2	4	0	1	1
1858	31	1	3	3	4	2	2	3	1	4	5	4	4	5	1	1	1	1	1	2	3	2	4	2	4	3	4	1	2	1	5	3	3	4	3	1	3	1	1	4	5	2	1	5	4	5	1	1	0
1859	27	1	3	1	4	2	1	2	1	3	3	2	3	4	2	3	2	3	1	3	2	2	3	3	2	3	3	2	2	1	5	3	3	3	4	2	4	1	2	3	4	2	1	4	3	4	0	0	1
1860	29	1	3	1	4	2	1	3	1	5	5	4	5	5	3	4	2	4	1	4	3	2	4	3	3	2	2	2	2	3	3	2	2	2	3	3	2	3	3	4	3	2	3	3	3	3	2	1	2
1861	35	1	3	2	4	2	3	2	1	5	5	5	5	4	2	2	2	2	1	2	2	3	3	2	3	3	4	1	4	2	4	2	4	4	4	2	2	2	2	4	4	2	2	4	2	4	0	0	0
1862	30	1	3	2	4	2	2	4	1	5	5	4	4	5	2	2	4	4	1	2	4	4	4	3	3	4	4	2	3	3	4	2	2	3	3	2	2	4	3	4	4	2	2	3	4	4	1	1	1
1863	22	1	2	1	2	2	1	3	2	4	3	4	3	3	2	3	2	2	2	1	3	3	3	3	2	3	3	1	2	2	3	4	3	3	2	4	4	2	4	3	4	2	3	2	2	2	1	1	0
1864	29	1	2	1	2	1	2	3	2	4	4	4	4	4	2	2	2	4	1	2	2	2	3	3	3	3	3	2	2	2	3	3	3	3	3	2	3	1	2	3	5	2	2	3	3	5	0	1	1
1865	28	1	2	1	2	2	1	4	2	5	5	5	5	5	5	1	5	4	1	5	5	1	5	5	5	5	5	1	2	1	5	2	1	1	1	1	5	2	1	1	2	1	1	2	2	5	0	0	0
1866	27	1	2	1	4	2	1	4	1	5	4	3	3	4	2	2	2	2	1	3	3	3	3	2	3	3	3	2	2	2	3	3	3	3	3	2	2	3	2	3	4	2	3	3	3	3	1	1	1
1867	25	1	2	1	4	2	1	5	2	3	4	2	2	3	4	4	4	4	3	3	4	5	4	5	2	2	4	4	4	4	4	4	4	4	4	4	4	4	4	4	4	4	4	4	4	4	2	2	2
1868	25	1	2	1	2	2	2	4	2	4	5	4	4	4	3	3	3	3	3	5	5	4	5	4	3	3	4	1	1	2	4	2	4	2	4	2	4	3	3	3	4	3	2	2	4	4	1	2	2
1869	31	1	2	2	4	2	3	4	2	3	4	2	2	4	1	4	4	4	5	5	5	5	5	5	3	3	4	2	2	2	4	4	2	2	4	1	2	4	4	4	4	2	2	1	4	3	1	1	1
1870	28	2	2	2	2	2	2	4	2	4	4	4	4	4	2	4	2	4	1	4	4	2	4	4	3	3	3	2	2	2	3	4	2	2	2	2	4	2	2	2	3	2	2	2	4	2	1	1	1
1871	30	1	2	3	3	2	4	4	1	4	5	4	4	4	4	3	3	3	1	4	5	4	4	4	3	3	2	4	2	2	4	4	3	5	5	4	4	3	2	4	4	2	2	4	4	3	1	1	1
1872	34	1	2	2	4	1	4	5	2	3	4	2	3	3	3	3	3	4	3	3	3	3	4	4	3	3	3	2	3	1	3	2	3	2	3	1	2	3	2	3	3	2	2	3	3	3	1	1	0
1873	28	1	3	1	4	2	2	4	2	5	5	5	4	5	4	5	5	5	1	3	3	3	3	3	2	3	3	2	2	1	3	2	3	3	4	3	3	2	3	3	3	3	3	2	4	4	0	1	1
1874	28	1	2	2	4	2	2	4	2	2	4	2	3	2	4	5	4	4	1	4	3	3	3	3	1	1	1	3	2	5	1	5	5	2	1	2	2	2	4	2	2	5	3	1	3	3	3	3	3
1875	35	2	2	2	2	2	2	2	1	5	5	5	5	5	1	1	1	1	1	5	5	5	5	2	1	5	5	5	2	2	5	3	3	5	5	2	5	2	1	3	5	5	5	5	3	5	1	1	1
1876	35	1	2	2	4	2	4	2	1	5	5	5	5	5	2	2	2	2	1	3	2	2	3	2	4	3	4	2	2	2	4	2	2	3	3	2	3	4	2	3	4	2	2	4	2	3	0	1	2
1877	37	1	3	2	4	2	4	2	1	5	5	5	5	3	1	1	1	1	5	3	5	3	5	3	1	5	5	2	5	1	5	5	5	5	2	1	5	5	5	3	3	1	5	5	5	3	2	2	2
1878	27	1	2	2	3	2	2	5	2	5	5	5	5	5	5	1	1	1	1	2	4	2	5	5	5	3	3	1	1	1	5	1	3	5	4	1	1	1	1	1	1	1	1	3	1	3	0	0	0
1879	33	1	2	2	4	2	3	3	2	4	3	4	4	4	2	2	3	2	2	3	2	2	3	2	3	3	3	2	2	2	4	2	3	3	3	2	2	2	2	3	3	2	2	3	2	4	0	1	1
1880	33	1	2	3	4	2	1	2	1	4	5	5	4	4	1	2	3	3	1	2	1	1	5	2	4	4	4	2	4	2	5	4	1	2	5	1	2	3	1	3	4	1	2	2	3	2	1	1	3
1881	28	1	3	2	4	2	2	2	1	4	4	4	4	4	2	2	2	2	1	3	3	2	4	5	3	3	3	3	3	3	3	3	3	3	3	3	3	3	3	3	3	3	3	3	3	3	1	1	1
1882	29	1	3	2	4	2	2	2	1	4	5	4	5	4	4	2	2	2	1	1	2	2	2	2	3	3	4	2	3	1	5	2	3	5	3	1	5	1	3	4	4	1	1	4	4	5	0	1	1
1883	33	1	2	2	4	2	3	2	1	5	4	4	5	4	3	2	2	2	1	3	4	2	3	4	3	3	4	2	3	2	4	2	2	2	3	1	3	2	2	3	3	2	2	3	3	4	1	1	0
1884	28	1	2	2	4	2	2	5	2	4	4	4	4	4	4	4	4	4	4	4	4	4	4	4	4	4	3	3	3	3	3	3	3	3	3	3	3	3	3	3	3	3	3	3	3	3	2	2	2
1885	29	1	3	2	4	2	2	3	2	4	4	4	4	4	2	4	2	2	2	2	3	4	4	4	2	2	4	2	2	2	3	2	2	3	4	2	3	2	2	3	3	2	2	2	3	3	0	0	0
1886	32	1	2	3	3	2	3	4	2	5	5	5	5	5	2	2	2	2	2	3	2	3	4	3	3	3	5	1	3	2	5	4	2	3	4	1	4	1	1	3	3	2	2	3	2	5	0	0	0
1887	34	1	3	2	4	2	1	4	1	5	5	5	5	5	2	1	3	4	3	3	4	4	4	4	4	3	2	3	2	3	3	3	3	3	3	2	4	1	3	3	3	3	4	4	3	4	0	1	1
1888	28	1	2	1	4	2	2	3	2	4	3	4	4	4	2	2	2	2	2	3	3	3	4	3	3	3	4	2	4	2	4	2	2	4	4	2	3	2	2	4	4	2	2	4	2	4	0	1	1
1889	21	1	2	1	2	2	1	5	2	3	5	5	3	5	5	5	4	4	3	4	2	3	4	4	4	4	4	4	4	4	4	4	4	4	4	4	4	4	4	4	4	4	4	4	4	4	1	1	1
1890	35	1	2	2	4	2	4	5	1	5	5	5	5	5	2	4	2	2	1	3	4	4	5	5	3	3	3	3	2	2	4	4	2	2	4	1	3	2	2	4	4	4	2	2	2	4	1	1	1
1891	33	1	2	2	3	2	4	5	2	5	5	5	5	5	1	2	2	2	1	3	3	2	3	3	3	2	3	1	3	1	3	1	1	3	3	1	3	1	1	3	3	1	2	2	2	3	0	0	0
1892	32	1	2	2	4	2	4	2	2	5	5	5	5	5	1	1	1	1	1	1	1	2	3	3	5	5	4	2	3	2	3	3	2	3	4	2	3	2	2	3	3	2	2	3	3	3	0	0	1
1893	34	1	2	3	4	2	4	4	1	4	4	4	4	4	2	3	2	3	3	3	3	3	4	3	3	3	3	2	2	2	3	3	3	3	3	2	3	2	2	3	3	3	3	3	3	3	1	1	1
1894	34	1	2	3	4	2	4	5	2	4	4	4	4	4	4	1	1	1	1	5	5	4	5	3	4	4	3	3	3	3	4	4	4	4	4	4	4	4	4	4	4	4	4	4	2	5	2	1	1
1895	32	1	2	3	2	1	1	3	2	5	5	5	5	5	2	2	3	2	2	3	3	3	3	2	3	3	2	2	2	2	3	2	3	3	3	2	3	1	3	3	3	3	3	2	2	3	1	1	1
1896	29	1	2	1	3	2	3	5	2	4	4	4	4	4	4	2	4	4	2	4	2	3	4	2	2	2	4	4	2	2	4	4	2	2	2	2	2	2	4	2	2	4	4	2	4	4	1	1	1
1897	28	1	2	1	3	2	2	3	2	4	4	3	3	3	2	2	4	3	4	3	4	3	3	3	2	2	2	4	2	3	3	4	4	3	2	3	3	3	3	2	1	2	3	2	5	1	2	2	3
1898	22	1	2	1	3	2	2	5	2	5	5	5	5	5	1	1	1	5	1	3	3	1	5	3	3	3	3	1	3	1	4	2	2	1	5	1	4	1	1	3	4	2	1	4	1	4	1	1	0
1899	26	1	1	1	2	1	1	5	2	3	4	3	3	4	3	3	3	3	3	3	3	3	3	3	3	3	3	3	3	3	3	3	3	3	3	3	3	3	3	3	3	3	3	3	3	3	1	1	1
1900	31	1	1	2	3	1	3	5	2	5	5	5	5	5	2	4	4	4	3	5	3	3	3	4	2	4	3	2	4	1	4	2	2	4	4	2	4	2	2	4	4	2	2	4	3	3	1	1	2
1901	24	1	2	1	4	2	2	3	2	4	4	3	4	3	2	2	2	4	1	1	2	2	2	2	4	4	4	2	4	3	4	4	2	3	4	2	3	4	4	4	4	3	4	4	4	4	1	1	2
1902	30	2	1	2	2	1	3	2	1	5	4	5	5	5	2	2	2	2	1	5	5	4	4	2	4	4	3	2	1	2	3	4	2	4	3	2	4	1	2	3	3	2	2	3	3	3	1	1	1
1903	29	1	2	3	4	2	1	5	2	4	4	4	4	5	2	2	2	2	1	3	3	3	3	3	3	2	3	3	2	2	3	3	3	3	4	2	4	2	2	4	4	2	3	4	3	3	0	1	0
1904	23	1	2	1	2	2	2	5	2	4	4	4	4	4	1	3	3	2	1	4	4	4	5	3	3	2	3	2	2	3	3	3	2	2	2	1	3	2	2	3	3	2	2	2	3	2	1	1	1
1905	22	1	2	1	2	1	1	5	2	4	4	4	4	3	4	4	4	2	2	3	4	3	3	3	2	2	4	2	3	1	4	4	2	2	3	1	4	2	2	4	2	3	2	2	4	4	0	1	2
1906	30	1	3	1	4	2	2	3	1	3	3	3	3	4	3	2	2	1	1	2	2	2	3	3	3	3	1	2	2	2	3	3	2	3	4	2	2	2	2	3	3	2	2	2	2	3	1	1	1
1907	29	2	1	1	2	1	1	5	2	3	3	3	3	4	4	4	3	3	3	4	4	3	4	4	3	2	4	3	4	4	4	4	4	4	2	2	2	4	2	4	4	3	2	4	4	2	2	1	3
1908	25	1	1	1	2	1	2	5	2	4	4	4	4	3	2	4	2	4	1	4	2	3	5	3	1	1	4	1	4	1	1	5	1	3	1	1	3	5	1	3	1	1	4	3	1	3	2	2	3
1909	29	1	1	2	2	1	3	5	2	5	5	5	5	5	4	5	2	5	3	2	2	3	5	5	5	5	4	2	2	2	5	5	5	2	5	2	5	2	2	4	4	2	2	2	2	4	1	1	0
1910	22	1	2	1	2	1	2	1	2	4	4	3	3	3	3	4	1	2	4	3	2	4	3	2	3	2	3	2	4	1	5	4	3	4	4	2	3	3	3	2	5	3	3	4	4	4	1	1	1
1911	25	2	2	2	2	1	2	2	1	5	5	5	5	5	1	1	1	1	1	5	2	2	5	2	2	3	4	1	4	1	4	4	1	1	4	1	4	1	1	4	4	1	1	4	1	4	0	0	1
1912	23	2	1	1	1	1	1	5	2	4	4	4	5	4	4	2	3	2	2	5	3	3	4	3	2	3	3	2	2	2	4	2	2	3	4	2	2	3	2	3	3	2	2	2	2	3	1	1	1
1913	22	2	2	1	2	1	2	5	2	5	5	5	5	5	1	2	4	2	2	3	2	3	3	2	4	3	5	2	3	2	4	4	4	4	4	4	4	4	4	4	4	4	2	3	1	4	1	1	2
1914	28	1	2	1	2	1	3	5	2	4	4	3	3	3	4	4	5	2	3	5	5	4	5	5	1	3	3	2	3	3	3	3	4	3	3	1	3	5	3	2	3	4	4	2	3	2	2	2	1
1915	31	1	1	2	4	1	3	5	2	4	4	4	4	4	3	3	3	1	1	1	1	4	3	3	3	3	1	1	1	1	1	1	1	1	1	1	1	1	1	1	1	1	1	1	1	1	0	0	0
1916	23	1	2	1	2	1	1	5	2	2	4	2	2	3	4	4	4	3	3	3	5	4	3	3	1	1	3	3	3	3	3	3	3	3	2	4	2	3	1	4	4	2	4	2	3	4	2	2	0
1917	30	2	1	2	2	1	3	5	2	4	4	4	4	4	4	1	2	4	2	4	4	4	4	4	4	2	3	4	2	4	2	4	4	4	4	4	4	4	4	4	4	4	4	4	4	4	2	3	3
1918	26	1	2	1	4	2	2	2	2	4	4	4	4	4	2	3	3	2	2	1	2	2	4	2	3	3	3	2	2	3	3	3	2	2	3	2	4	3	2	3	3	2	2	3	3	3	2	1	2
1919	32	1	2	1	4	2	4	5	2	3	3	3	3	3	2	4	4	4	4	3	4	3	4	3	2	3	4	4	1	2	4	4	4	4	2	2	2	2	4	2	2	4	4	2	4	2	2	2	2
1920	29	1	2	2	2	1	4	3	1	5	5	5	5	5	1	2	1	1	1	3	4	4	4	4	4	4	3	1	3	1	4	4	3	3	4	1	3	3	2	3	3	2	3	3	4	3	1	1	1
1921	29	1	2	3	3	2	3	4	2	4	5	4	1	5	1	3	1	4	3	3	3	3	4	3	3	3	4	2	4	2	4	2	2	3	2	3	2	3	3	2	2	3	3	2	3	3	0	1	1
1922	25	1	1	1	2	1	2	4	2	4	5	4	4	3	4	4	3	4	5	5	4	4	5	2	1	1	4	1	3	2	5	4	5	4	5	4	4	4	4	5	5	4	1	5	5	5	1	1	3
1923	22	2	2	1	2	1	1	5	2	4	4	4	4	4	2	2	2	2	4	4	4	4	2	3	1	1	3	3	1	1	3	3	1	1	1	3	1	2	3	2	5	4	3	2	3	2	2	2	2
1924	30	1	2	1	2	1	2	5	2	3	3	3	3	3	2	2	2	3	1	3	3	3	3	3	2	2	2	1	2	2	3	3	3	3	3	2	2	2	3	3	3	3	2	3	3	3	1	1	1
1925	38	1	2	3	3	2	4	5	2	4	4	4	4	4	3	4	4	2	2	1	2	3	4	3	2	4	2	2	2	2	3	3	4	3	2	2	2	2	3	2	3	3	3	2	3	3	1	1	1
1926	21	2	2	1	2	1	1	5	2	3	4	2	3	3	3	3	3	3	4	3	5	5	4	3	1	1	1	5	1	1	1	5	5	5	5	5	5	5	4	2	3	5	5	1	4	5	1	1	1
1927	34	1	2	3	4	2	4	5	2	4	4	3	3	3	2	2	2	2	3	3	2	2	4	3	3	4	4	1	4	1	4	4	4	4	4	2	4	4	4	4	4	2	2	4	2	4	0	1	0
1928	26	1	2	1	2	1	2	5	2	5	5	5	5	5	5	5	2	3	1	3	3	3	4	3	2	2	4	4	4	4	4	4	4	4	4	4	4	4	4	4	4	4	4	4	4	4	1	1	1
1929	21	1	2	1	1	1	1	5	2	5	5	5	5	5	2	2	1	2	2	4	3	2	2	2	4	4	3	2	3	2	3	2	2	2	4	2	4	2	2	4	4	2	2	2	2	4	0	0	0
1930	22	1	2	1	2	1	2	5	2	4	4	3	4	3	3	3	3	3	4	4	4	3	2	3	3	3	5	3	2	2	5	4	4	2	4	1	2	2	4	4	4	4	3	4	4	4	1	3	3
1931	27	2	1	3	2	1	1	5	2	5	3	4	4	3	2	2	5	1	3	5	5	5	3	1	2	1	3	2	1	4	5	4	1	2	5	1	5	1	1	1	5	2	2	5	1	2	1	1	1
1932	20	2	1	1	2	1	1	5	2	5	5	5	5	5	1	1	1	1	1	1	1	1	1	1	5	5	5	1	5	1	5	1	1	5	5	1	5	1	1	5	5	1	1	5	1	5	0	0	0
1933	22	1	2	1	2	1	2	4	2	4	4	4	5	3	2	2	3	2	2	3	4	3	4	3	4	3	3	2	1	3	3	3	3	3	3	2	2	2	2	2	2	2	2	2	2	2	1	1	0
1934	26	2	1	2	1	1	2	1	1	5	5	3	4	4	2	2	2	3	1	4	3	3	3	2	3	2	3	1	2	2	4	4	4	4	3	2	4	2	4	4	4	4	3	1	2	5	0	0	0
1935	23	1	2	1	2	1	2	5	2	5	5	5	5	5	2	3	2	1	2	2	2	3	3	3	2	2	3	4	2	1	4	3	3	4	3	2	4	2	2	4	4	2	2	2	3	3	1	1	1
1936	26	1	2	2	3	1	3	5	2	5	5	5	5	5	1	2	5	2	1	5	4	4	5	1	5	4	3	2	3	2	4	4	4	3	4	1	4	2	4	4	4	2	4	4	4	4	1	0	2
1937	22	1	2	1	2	1	2	5	2	4	4	4	4	4	3	4	2	3	1	3	2	2	2	2	2	3	4	2	2	2	4	2	3	4	4	2	3	2	2	4	4	2	2	4	1	3	0	0	0
1938	29	1	1	1	2	1	1	5	2	3	4	3	4	3	4	3	3	4	3	4	2	4	4	3	2	2	4	2	3	2	4	3	1	1	4	2	4	4	2	3	4	2	2	3	4	4	1	1	0
1939	33	1	2	3	4	2	4	5	2	3	3	3	3	3	3	3	3	3	3	3	3	3	3	4	3	3	3	3	2	2	4	2	4	2	4	4	3	2	3	2	4	3	2	2	3	4	0	0	0
1940	33	1	1	3	2	1	1	5	2	3	3	3	4	4	3	3	4	4	4	4	5	3	3	4	2	2	1	3	1	1	3	3	3	3	2	2	2	3	2	3	3	3	2	3	3	3	2	2	3
1941	26	1	1	2	2	1	1	5	2	3	3	3	4	4	3	3	4	4	4	4	5	3	3	4	2	2	1	3	1	1	3	3	3	3	2	2	2	3	2	3	3	3	2	3	3	3	2	3	3
1942	27	1	2	1	4	2	2	4	2	3	4	3	3	4	2	3	3	3	3	3	3	2	3	3	2	3	3	2	2	2	3	3	2	2	3	2	2	2	2	3	4	2	2	3	2	4	0	1	1
1943	28	1	2	1	4	2	3	3	2	3	3	2	2	3	2	3	2	2	3	3	2	4	2	4	2	3	2	3	2	3	3	4	4	3	2	2	3	2	5	3	3	3	4	2	4	2	2	2	1
1944	22	2	2	1	2	1	1	1	2	5	5	5	5	5	1	1	1	1	1	5	5	5	5	2	2	2	1	1	1	1	5	1	1	1	5	1	5	1	1	1	5	1	1	1	1	5	0	0	1
1945	21	2	2	1	2	1	1	1	2	5	5	5	5	4	2	1	2	2	1	5	3	2	2	3	3	3	4	1	3	2	5	2	1	2	5	2	5	1	1	3	4	1	1	2	1	4	0	0	0
1946	32	2	1	2	2	1	2	5	2	4	4	2	3	2	3	4	4	4	1	3	3	4	4	1	1	1	3	2	2	2	4	3	3	2	4	2	3	2	2	3	4	3	2	3	3	3	1	1	0
1947	29	1	2	1	2	1	1	5	2	4	5	4	4	3	2	3	3	2	1	4	4	4	4	5	1	1	3	2	2	3	4	4	4	3	2	2	3	2	2	4	4	4	4	3	3	3	2	1	1
1948	22	2	1	1	2	1	1	5	2	4	4	4	5	5	3	3	3	3	1	3	3	3	5	3	3	3	3	3	2	1	5	4	4	4	5	1	3	2	2	4	4	2	2	2	3	3	1	0	1
1949	25	1	2	1	4	2	2	4	2	4	5	4	4	4	2	3	2	2	2	2	2	2	3	3	3	3	2	3	2	2	3	3	3	3	2	1	2	2	2	2	3	3	3	3	3	3	1	1	2
1950	30	1	1	2	3	1	2	5	2	4	5	4	4	3	2	1	2	4	2	3	2	2	4	4	5	5	3	1	3	2	5	4	3	2	3	2	3	2	2	4	4	2	2	3	3	3	1	1	1
1951	25	2	2	1	2	1	2	5	2	3	3	3	3	3	1	1	1	1	3	3	2	2	2	1	3	3	5	1	3	1	5	1	3	1	5	1	5	3	1	1	5	1	1	2	3	5	1	1	1
1952	29	1	2	1	2	1	3	5	2	5	5	5	4	5	2	3	4	2	2	3	3	2	3	1	2	2	5	1	3	1	5	1	2	4	5	1	4	2	2	4	4	3	2	3	2	4	1	1	1
1953	33	2	2	3	2	1	3	5	2	4	5	5	5	5	1	1	4	2	5	5	4	5	5	5	1	1	2	1	2	2	3	3	3	3	2	3	3	2	3	3	3	3	3	3	3	3	2	3	3
1954	23	1	2	1	2	1	2	3	2	3	4	3	4	4	2	2	2	2	2	2	2	2	2	2	3	3	4	2	3	3	4	4	2	4	4	2	3	4	4	4	3	2	2	4	3	4	0	0	1
1955	29	1	2	2	2	1	2	3	2	4	4	4	4	5	2	3	2	3	1	4	2	3	4	2	2	2	3	2	2	2	3	3	3	2	3	2	4	2	2	3	3	2	2	2	2	2	1	1	1
1956	28	2	2	1	2	2	3	5	2	5	5	5	5	4	1	2	2	2	1	2	4	4	4	2	3	2	3	2	1	2	5	2	3	4	5	2	3	1	2	3	4	2	2	2	2	2	1	1	1
1957	28	1	1	2	2	1	1	4	2	5	5	5	5	5	1	2	2	1	1	4	4	3	3	1	1	2	5	1	4	1	5	1	2	1	4	1	4	1	1	4	4	1	1	4	2	5	0	0	1
1958	29	2	1	2	2	1	1	5	2	4	4	4	4	4	2	2	2	3	1	3	2	2	3	2	3	3	3	2	3	2	3	2	2	3	3	2	3	2	3	3	3	2	2	3	2	3	1	1	1
1959	30	1	1	2	3	1	2	5	2	4	4	3	4	3	3	4	3	3	1	4	3	4	3	5	2	2	2	3	2	2	3	4	3	2	4	1	3	2	3	4	4	2	2	3	4	5	2	1	2
1960	29	1	2	2	4	2	1	4	1	4	4	4	4	5	2	1	3	3	1	3	4	4	4	4	4	4	3	1	2	2	4	3	2	4	3	1	1	2	2	3	4	2	2	3	4	3	1	1	1
1961	29	1	2	1	4	2	3	5	2	5	5	5	5	5	2	4	4	4	3	4	3	3	3	3	3	4	3	4	2	4	3	5	2	2	3	1	4	1	2	4	5	2	2	4	4	4	1	1	1
1962	33	1	2	2	2	2	4	2	1	4	4	4	4	4	3	5	2	4	2	4	3	3	3	2	3	3	3	3	3	3	3	3	3	3	3	3	3	3	3	3	3	3	3	3	3	3	1	1	1
1963	25	1	2	1	2	1	2	3	2	4	4	4	4	3	3	2	2	3	3	3	2	2	4	2	3	3	4	4	4	3	4	2	3	4	2	1	3	2	2	4	4	2	3	4	4	4	1	1	1
1964	26	1	1	3	2	2	3	4	2	5	5	5	5	5	1	1	1	2	2	2	2	4	3	2	4	3	4	2	2	2	3	4	3	2	3	2	3	2	2	3	3	3	2	3	2	3	0	0	0
1965	33	2	2	2	1	1	1	2	1	5	5	4	5	4	2	1	2	2	1	4	3	2	4	2	4	4	2	2	2	1	4	4	3	3	2	3	3	2	2	3	4	2	4	3	4	4	1	1	1
1966	39	1	2	2	1	2	1	2	1	4	4	4	4	4	4	3	2	3	1	5	5	5	5	4	3	3	2	3	2	2	3	3	4	3	2	2	3	3	3	2	3	4	3	3	3	2	1	1	1
1967	27	1	2	1	4	2	2	3	1	5	5	5	5	5	5	5	5	1	1	1	1	1	1	1	5	5	5	1	1	1	5	1	1	1	5	1	5	1	1	5	5	1	1	1	1	5	0	0	0
1968	28	1	3	1	3	2	1	3	1	4	5	4	4	4	3	4	4	2	1	3	3	2	4	4	3	3	4	2	4	1	5	2	2	4	4	1	4	2	2	4	4	1	2	4	1	4	1	1	0
1969	24	1	2	1	2	1	3	5	2	4	4	4	4	4	2	2	2	4	1	5	3	2	4	2	2	2	4	1	2	2	3	2	2	2	3	2	2	2	2	3	3	2	2	2	2	3	1	1	0
1970	26	2	1	1	2	1	3	5	2	4	4	3	3	4	2	2	3	2	2	3	2	2	3	2	3	3	4	2	3	1	4	2	2	2	4	2	4	2	2	2	2	2	2	2	2	3	0	0	0
1971	25	1	2	1	3	2	2	3	1	5	5	5	5	5	1	1	1	1	1	1	4	3	4	5	3	3	2	2	1	1	3	1	3	2	2	1	1	3	1	3	3	2	3	3	5	3	1	1	1
1972	30	2	1	3	2	2	4	5	2	4	5	4	4	5	2	2	3	2	1	4	2	4	4	4	2	3	4	3	2	2	4	3	2	4	4	2	4	2	2	5	5	2	2	4	2	5	0	0	1
1973	24	1	2	1	2	1	3	5	2	3	4	1	1	1	5	5	5	4	3	1	5	5	4	4	2	2	2	3	1	3	4	5	5	1	1	2	4	5	4	2	3	4	2	3	5	3	1	1	1
1974	29	2	2	3	1	1	3	2	1	4	4	4	4	4	3	3	3	3	1	4	4	3	3	1	2	3	4	2	2	1	5	4	2	3	4	3	3	2	2	4	4	1	2	4	2	4	1	1	1
1975	33	1	2	2	4	2	1	3	2	3	3	3	2	3	3	3	3	3	3	2	3	3	3	3	3	2	3	3	3	3	3	3	3	3	3	3	3	3	3	3	3	3	3	3	3	3	1	1	1
1976	33	1	2	3	2	2	1	2	1	5	5	4	5	5	2	2	2	2	1	3	4	3	4	2	2	2	3	3	1	2	2	4	1	1	4	1	5	3	2	3	3	1	2	2	2	2	0	1	1
1977	31	2	2	2	2	1	3	2	1	3	5	3	4	5	3	2	2	2	1	5	4	4	4	2	2	2	2	4	2	4	2	2	4	2	2	4	4	4	4	2	5	4	5	2	4	3	2	1	1
1978	32	1	2	2	2	2	2	5	1	5	4	5	5	5	3	3	3	3	1	3	3	2	4	4	4	3	3	5	1	4	4	4	4	2	2	2	3	2	4	3	4	3	4	2	2	3	1	1	1
1979	38	1	2	3	2	2	1	4	2	5	4	4	4	4	2	2	3	2	2	2	3	2	3	2	2	3	3	2	3	2	4	2	2	2	4	2	2	3	2	4	4	2	2	3	2	3	1	1	1
1980	30	1	2	3	3	2	4	5	2	4	4	4	4	4	2	2	3	2	2	3	3	4	4	4	3	3	3	2	1	2	3	3	2	3	3	2	3	2	2	2	3	2	2	3	2	3	0	1	1
1981	23	1	1	1	2	1	2	4	2	4	4	4	4	3	2	3	3	2	2	5	2	3	3	3	3	3	4	4	2	3	4	4	4	4	3	2	4	2	4	3	4	3	4	4	4	4	1	1	1
1982	30	1	2	1	3	1	2	5	2	4	4	4	4	4	2	3	2	4	1	4	4	3	4	3	4	3	2	2	2	2	3	2	3	2	2	2	3	2	2	3	4	2	2	2	3	3	1	1	1
1983	25	2	3	1	4	2	1	3	1	3	4	3	3	4	2	2	2	2	1	3	3	3	3	2	3	2	3	2	2	2	3	3	2	3	4	2	3	2	2	3	3	2	2	3	3	3	1	1	1
1984	28	1	2	1	4	2	3	3	1	3	4	4	4	4	3	2	2	2	1	2	4	4	4	3	3	2	3	3	2	3	4	3	4	2	4	2	4	2	4	3	4	2	3	2	3	4	1	1	0
1985	30	1	1	3	2	1	2	5	2	4	3	5	4	4	3	3	3	3	1	4	3	3	3	4	4	3	3	2	2	2	3	3	3	3	3	3	3	2	2	3	3	3	3	2	3	3	1	1	1
1986	28	1	2	1	3	1	3	5	2	4	4	4	3	3	3	3	4	4	4	4	4	4	5	5	4	4	5	1	2	2	3	3	3	2	2	1	4	4	2	3	3	2	2	2	3	3	1	2	3
1987	33	1	2	1	2	1	1	4	2	4	4	4	4	4	2	3	3	3	1	3	4	3	3	3	3	3	3	2	1	2	3	3	3	3	3	3	2	2	2	3	3	2	2	3	3	3	1	1	1
1988	34	2	2	2	2	2	1	2	1	5	5	5	5	5	2	2	2	2	2	2	2	2	4	2	4	4	4	2	3	2	4	2	2	2	4	4	4	2	2	4	4	2	2	4	4	4	0	1	1
1989	25	1	1	1	3	1	3	5	2	4	4	3	3	4	3	3	4	4	1	4	4	1	4	4	3	3	5	3	2	5	5	4	4	4	4	1	3	2	3	3	4	4	3	4	2	4	1	3	1
1990	32	2	2	2	2	1	4	5	2	5	5	5	5	5	5	5	5	5	5	5	5	5	5	5	5	5	3	3	3	3	3	3	3	3	3	3	3	3	3	3	3	3	3	3	2	3	0	1	1
1991	29	1	1	1	2	1	2	4	2	4	4	4	4	4	4	3	3	2	1	3	3	3	3	3	3	2	4	2	4	2	3	2	2	3	3	2	3	2	2	3	3	2	2	3	3	3	0	1	1
1992	25	1	1	1	2	1	3	5	2	5	5	5	3	5	1	1	2	2	1	2	3	2	3	5	5	2	2	3	2	3	4	3	3	3	3	1	3	3	2	3	3	3	2	3	3	3	1	1	1
1993	26	1	2	1	3	2	2	2	1	3	5	3	4	3	3	4	2	2	1	5	2	3	5	1	3	3	4	2	2	2	4	4	2	2	4	2	2	2	2	4	4	2	2	4	2	4	2	1	0
1994	25	1	1	1	3	1	3	5	2	5	5	5	5	5	2	1	2	1	1	3	3	3	4	4	3	3	2	2	2	2	3	3	4	2	2	1	2	2	3	3	4	2	2	2	2	3	1	1	3
1995	38	2	2	2	3	2	4	4	1	4	4	4	4	3	2	2	2	2	1	2	4	2	3	3	2	2	3	2	2	1	5	4	2	4	5	2	3	1	1	4	5	1	2	5	2	5	0	1	1
1996	38	2	2	1	2	2	4	2	1	5	5	5	5	5	5	2	2	2	1	3	2	3	3	2	3	3	4	2	2	2	4	3	2	3	3	3	3	3	3	3	3	2	3	3	2	3	1	1	1
1997	32	1	1	2	3	1	4	5	2	5	5	5	5	5	2	2	2	2	2	3	4	3	4	3	2	3	4	2	3	2	4	3	2	2	3	2	3	2	2	3	4	2	2	2	3	2	0	0	1
1998	30	1	2	1	2	1	2	3	1	5	5	5	5	4	2	2	2	2	1	2	2	2	2	2	2	2	3	3	2	2	3	4	4	4	2	2	2	2	4	2	4	3	2	2	2	2	1	1	0
1999	39	2	2	2	4	2	3	2	1	4	4	4	4	4	2	2	2	2	2	3	2	2	3	3	2	2	3	2	3	2	3	3	3	3	3	2	3	3	2	2	3	3	4	3	3	3	1	1	1
[truncated: 84 more rows]
[truncated: 7 more columns]
